# Supplementary material for: A New Series of Cytotoxic Pyrazoline Derivatives as Potential Anticancer Agents that Induce Cell Cycle Arrest and Apoptosis
Source: PubMed Central journal article supplement (PMC6151802; doi:10.3390/molecules22101635), 2017-09-29
Supplement: molecules-22-01635-s001.pdf [file molecules-22-01635-s001.pdf]

## Supporting Information

### A new series of cytotoxic pyrazoline derivatives as potential anticancer agents induces cell cycle arrest and apoptosis

Hong Wang <sup>1,†</sup>, Jinhong Zheng <sup>1,†</sup>, Weijie Xu <sup>1</sup>, Cheng Chen <sup>1</sup>, Duncan Wei <sup>2</sup>, Wenxiu Ni <sup>1,\*</sup> and Ying Pan <sup>1,\*</sup>

<sup>1</sup> Department of Chemistry, Shantou University Medical College, Shantou 515041, Guangdong, China; [13592851552@163.com](mailto:13592851552@163.com) (H.W.); [jhzheng@stu.edu.cn](mailto:jhzheng@stu.edu.cn) (J.Z.); [13536920534@163.com](mailto:13536920534@163.com) (W.X.); [13411963192@163.com](mailto:13411963192@163.com) (C.C.)

<sup>2</sup> Department of pharmacy, The First Affiliated Hospital of Shantou University Medical College, Shantou 515041, Guangdong, China; [weiduncan2012@163.com](mailto:weiduncan2012@163.com)

\* Correspondence: [wxni@stu.edu.cn](mailto:wxni@stu.edu.cn); [ypan@stu.edu.cn](mailto:ypan@stu.edu.cn); Tel.: +86-754-8890-0499; Fax: +86-754-8855-7562.

† These authors contributed equally to this work.

#### Contents

**Figure S1.** The representative <sup>1</sup>H NMR of all compounds **1b-12b**.

<sup>1</sup>H NMR spectrum of compounds **1b-12b** (400 MHz, DMSO)

**1b**

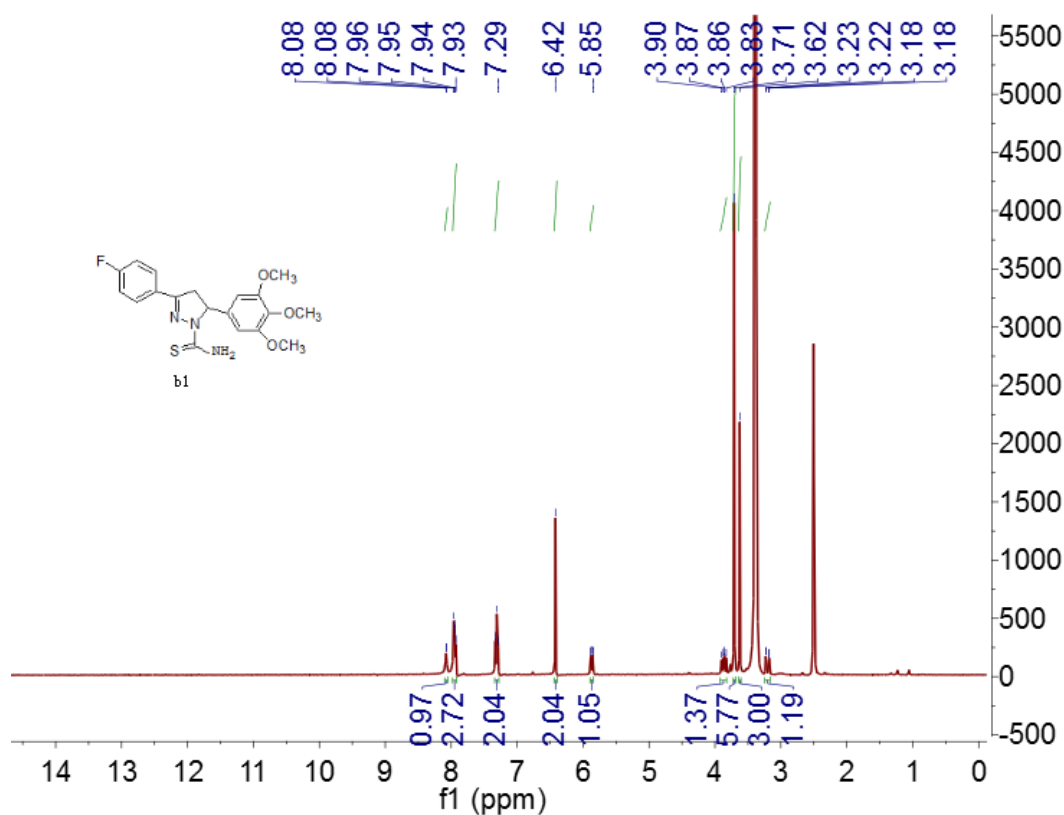

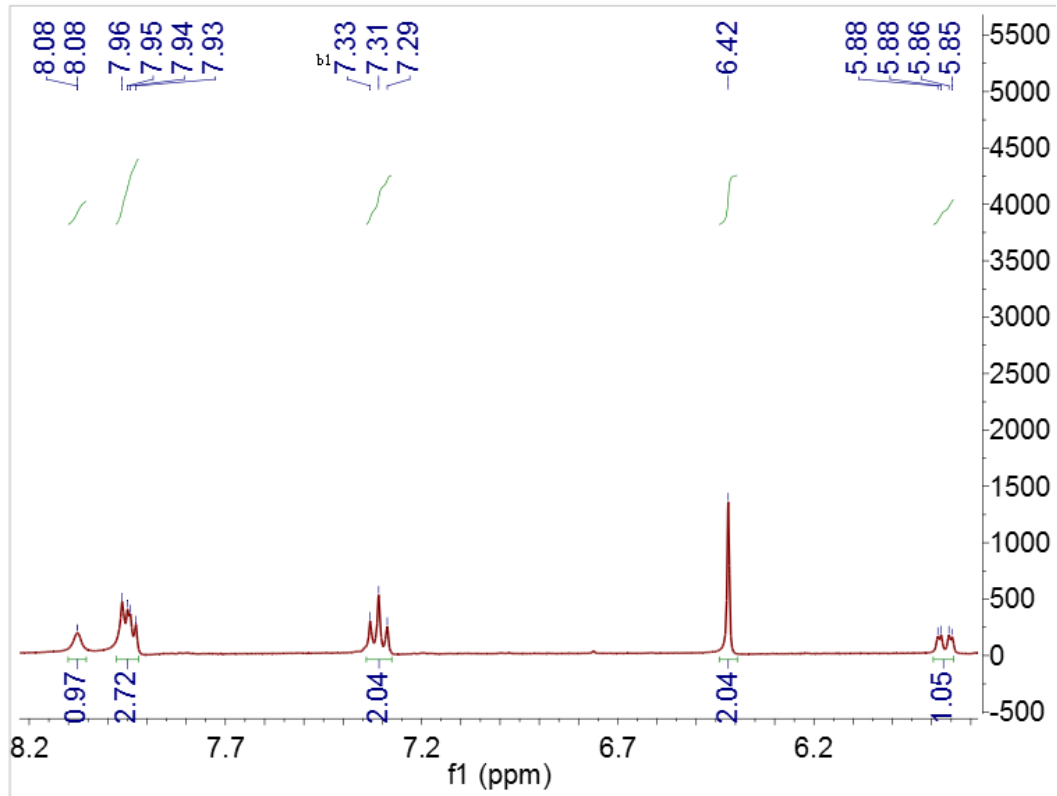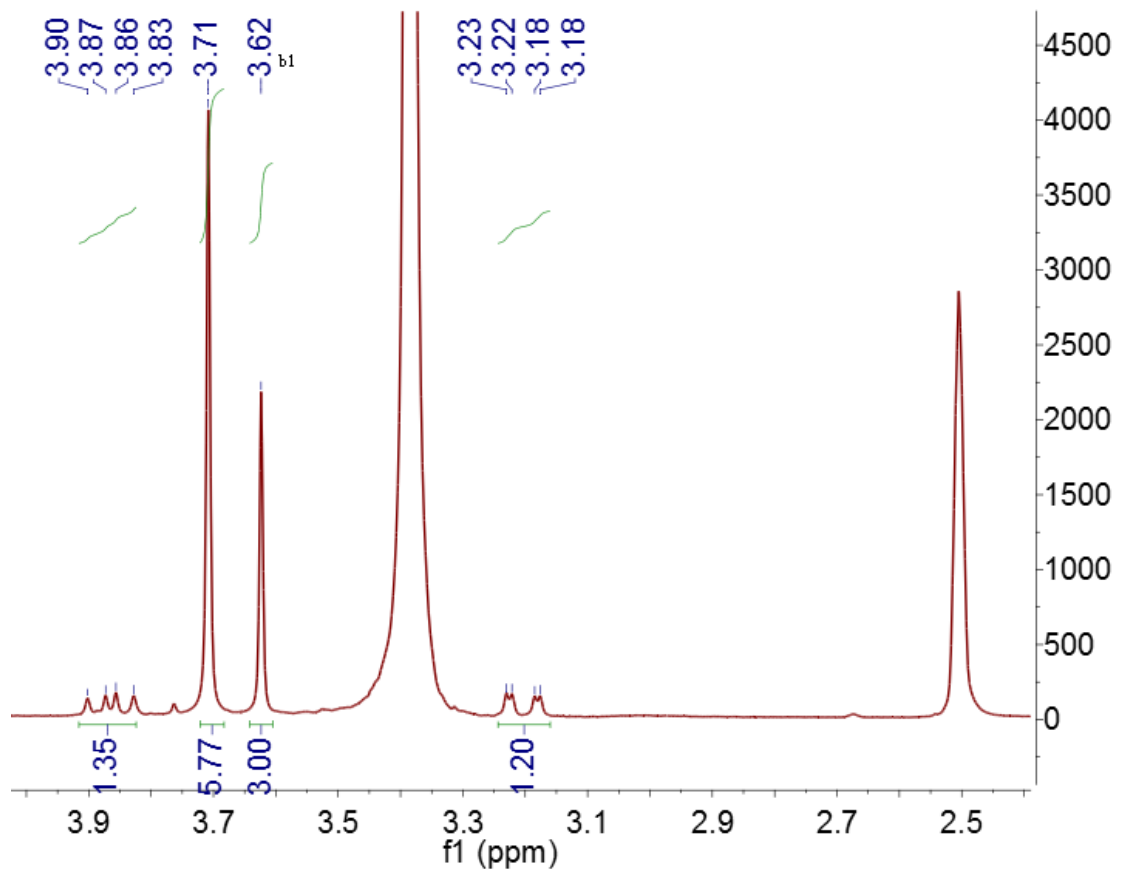

2b

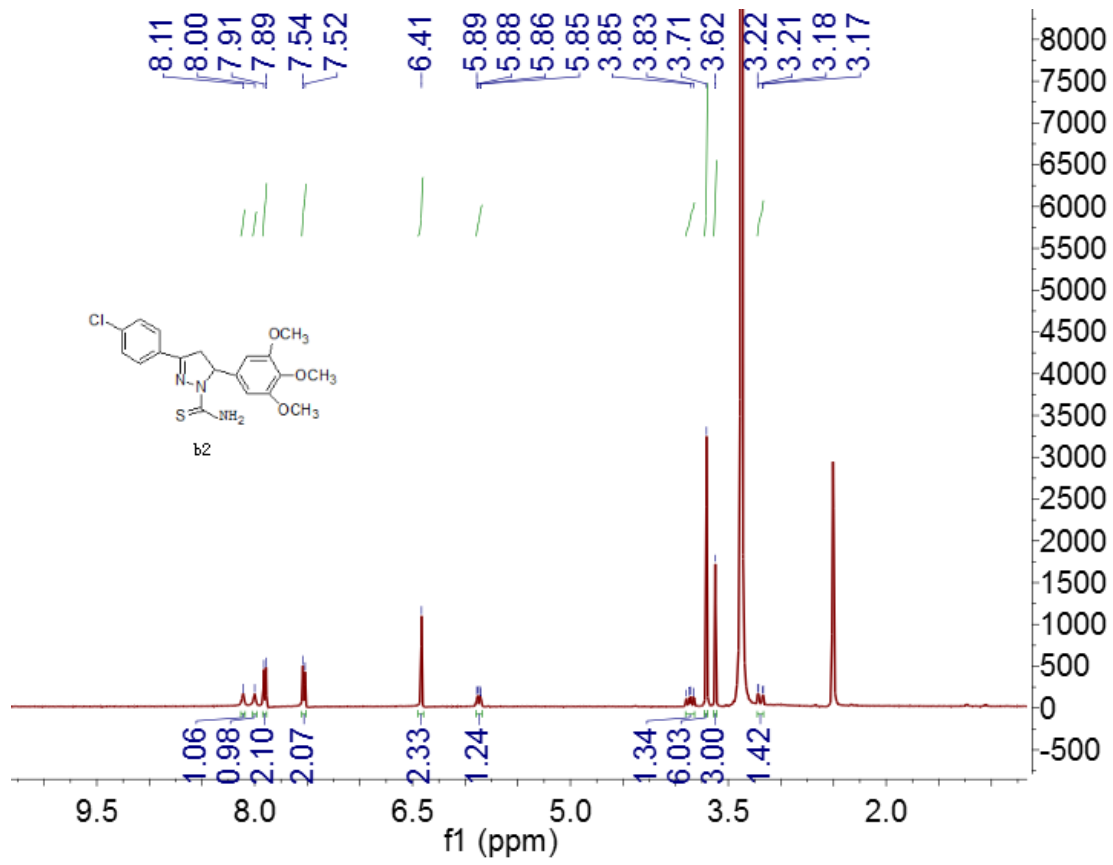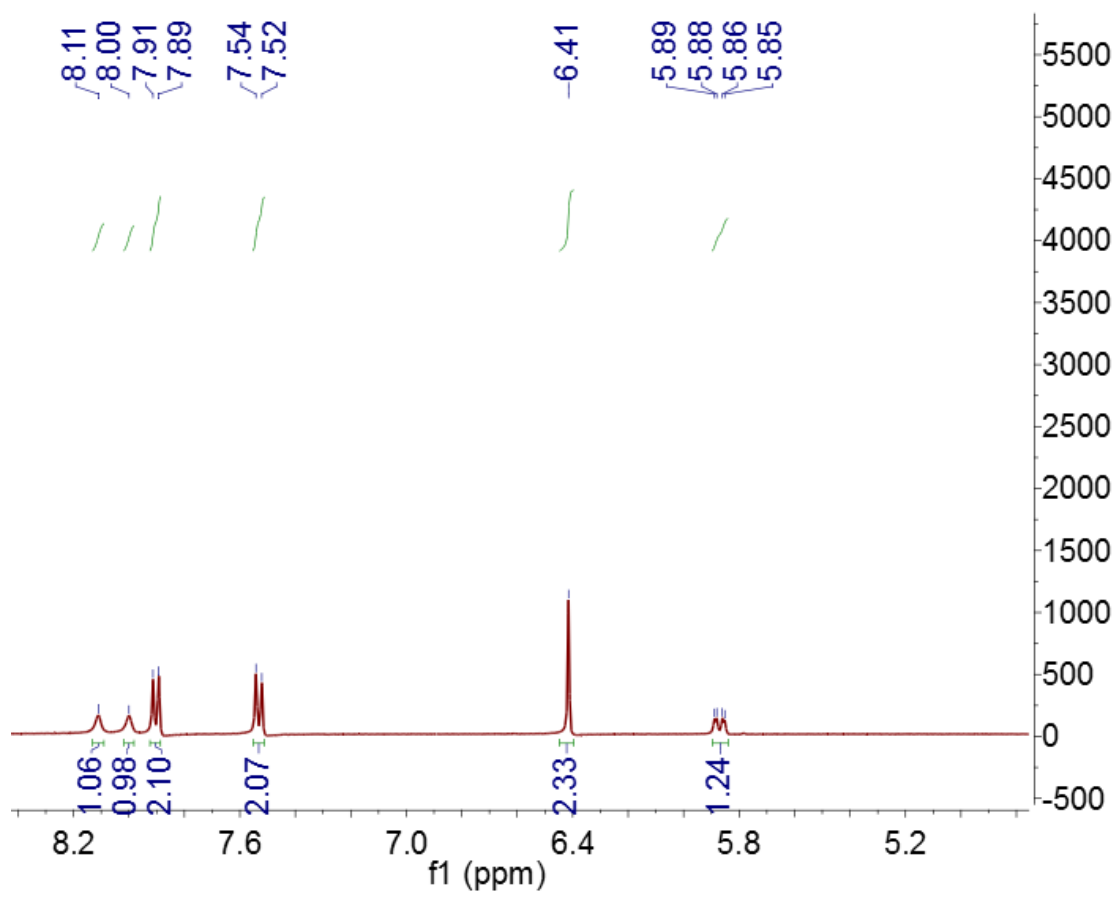

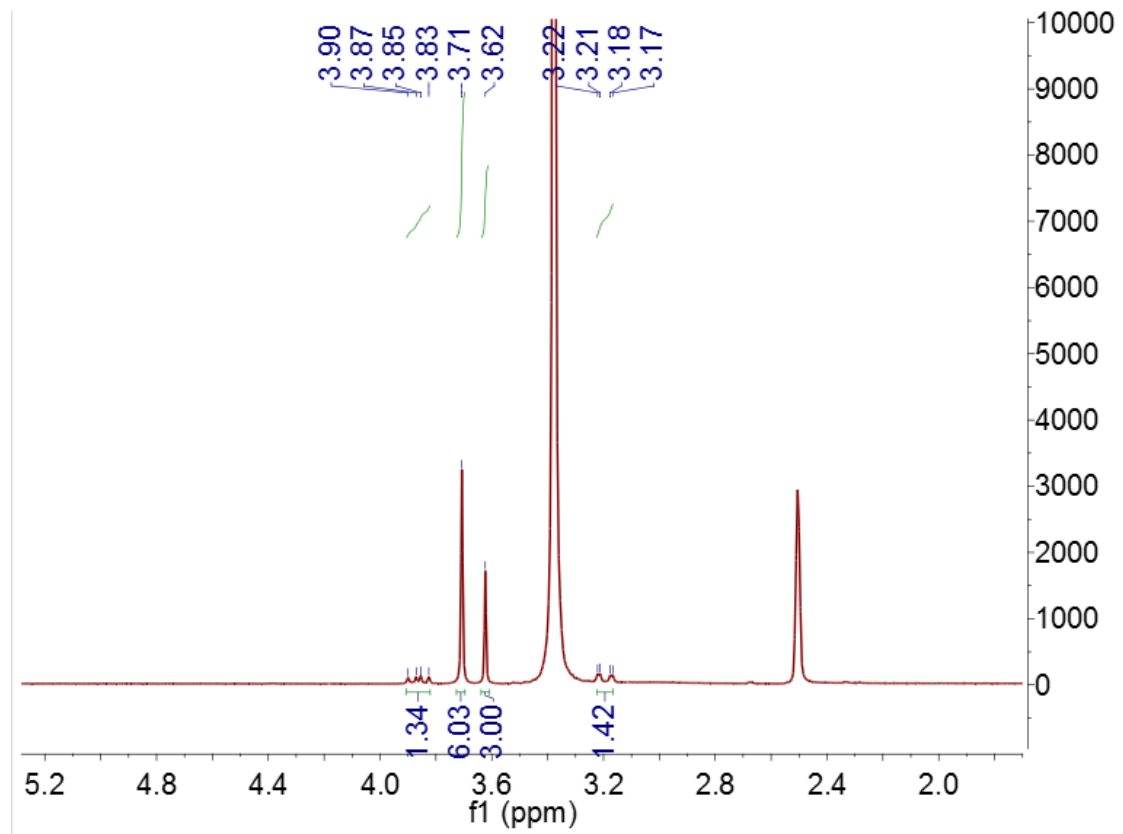

3b

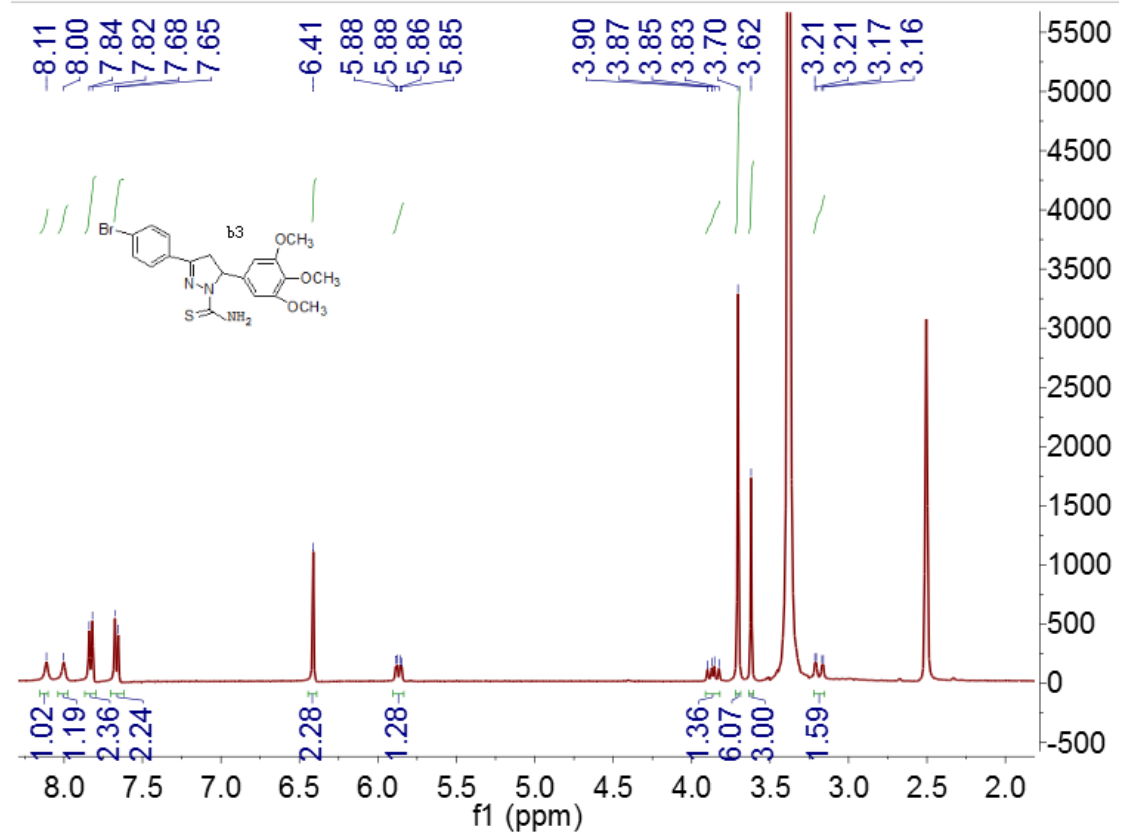

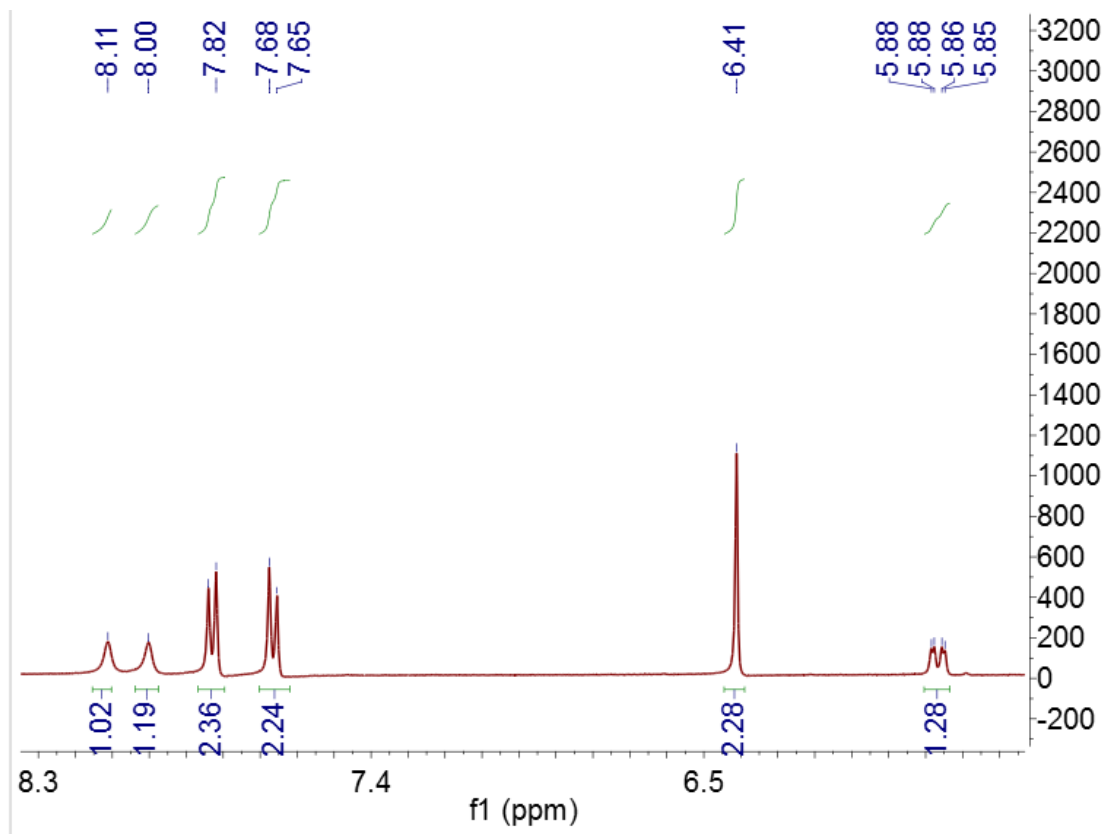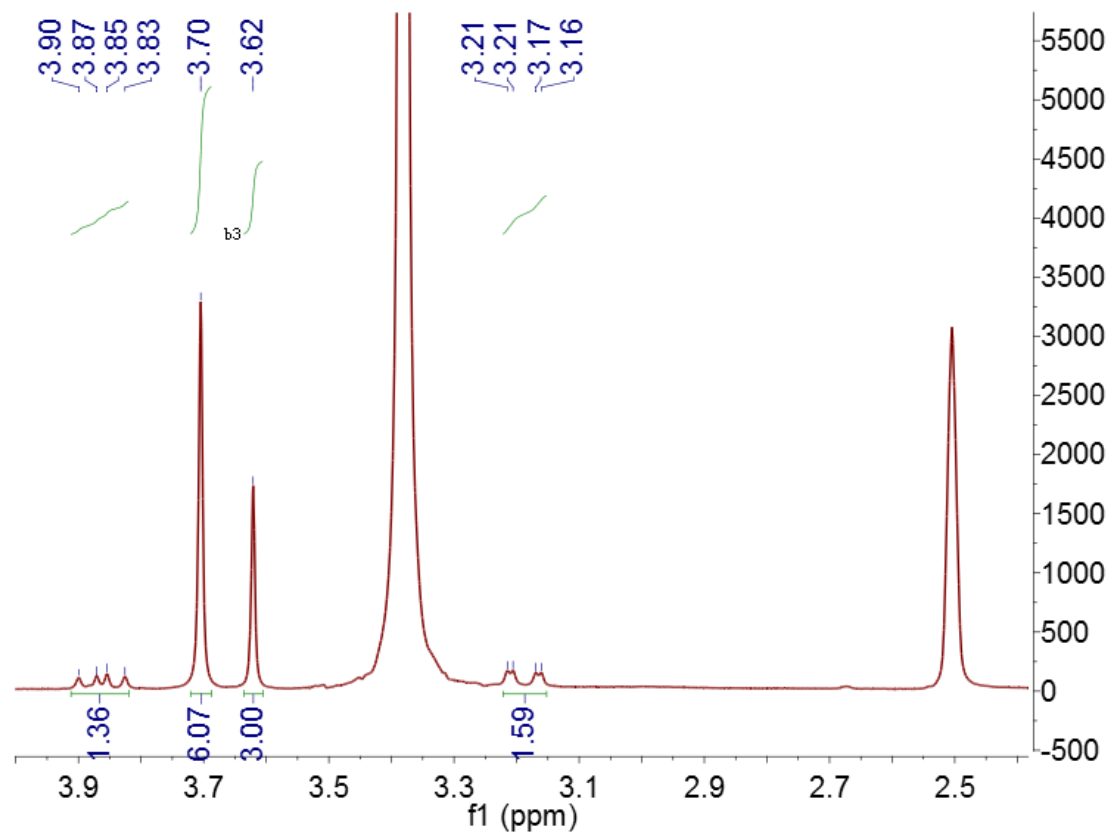

4b

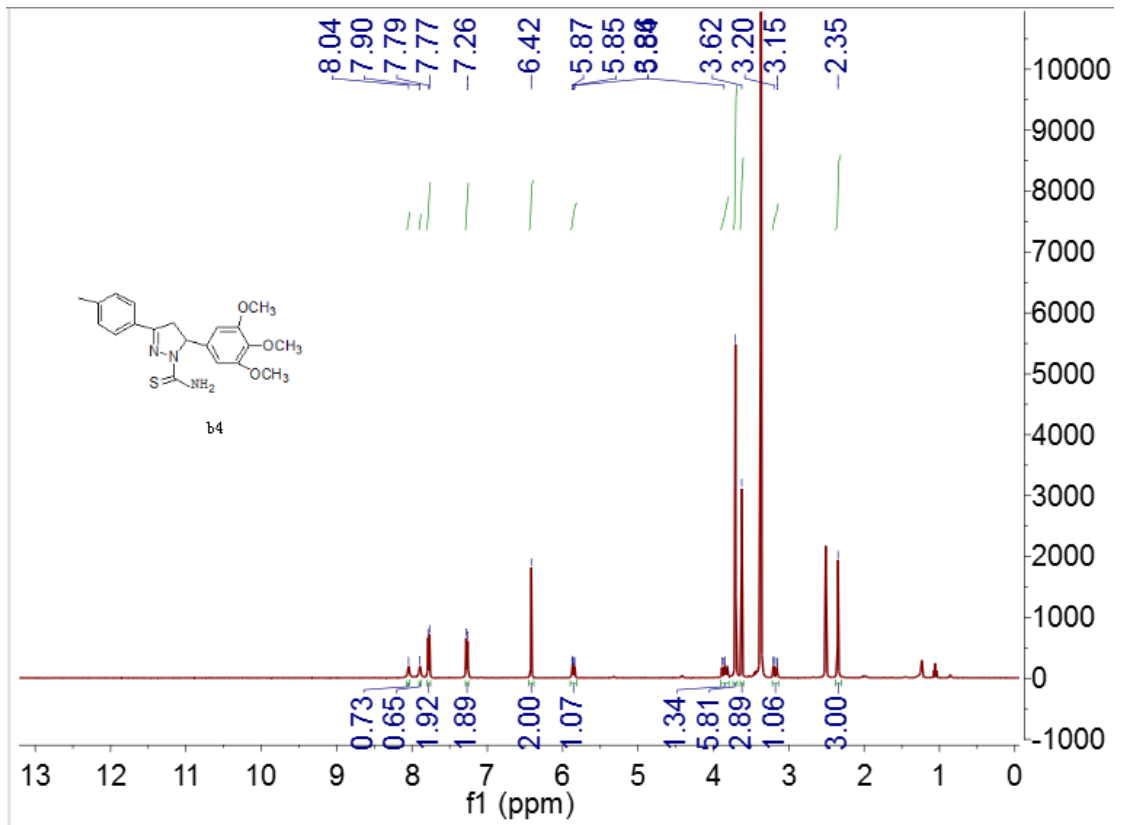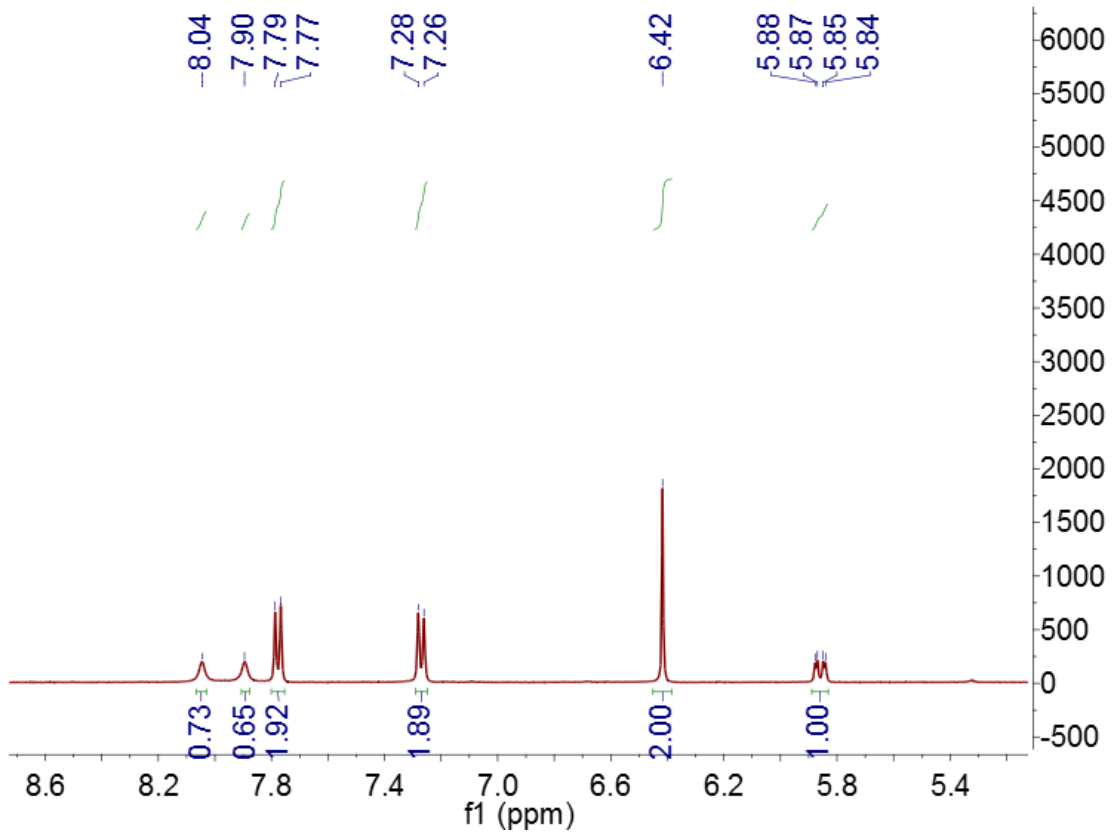

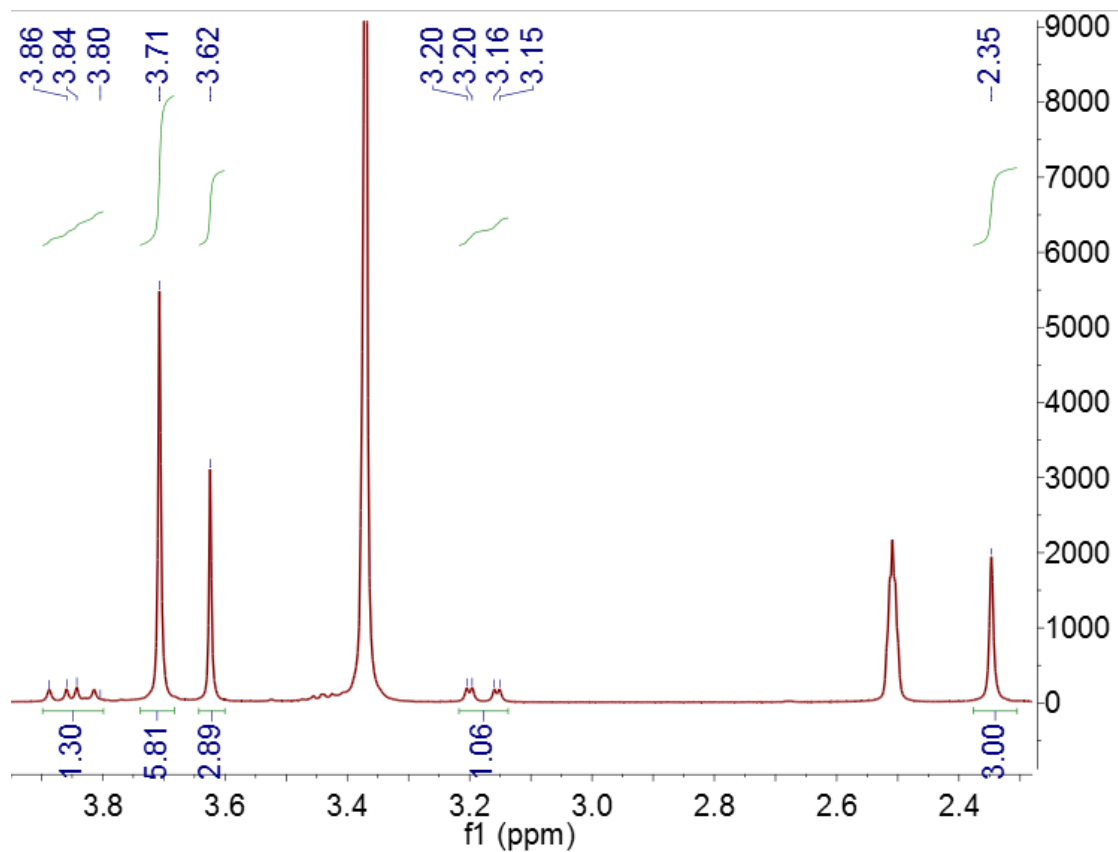

5b

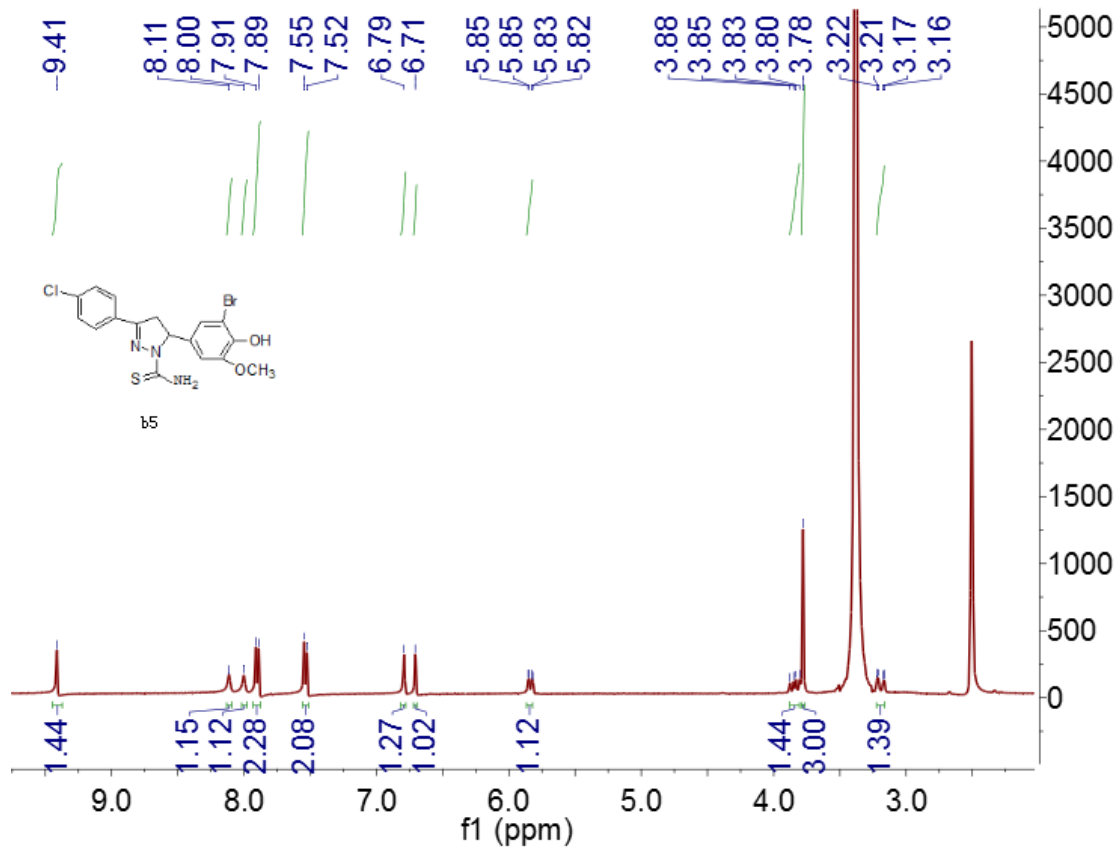

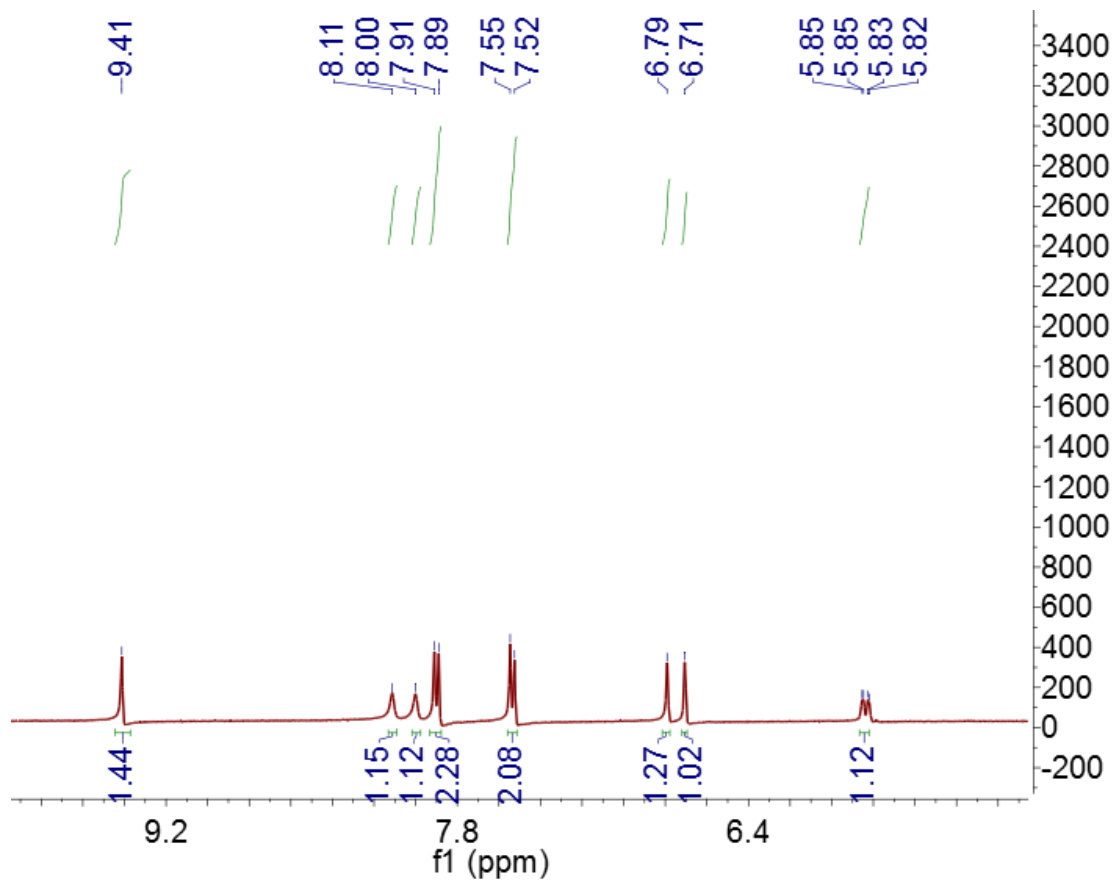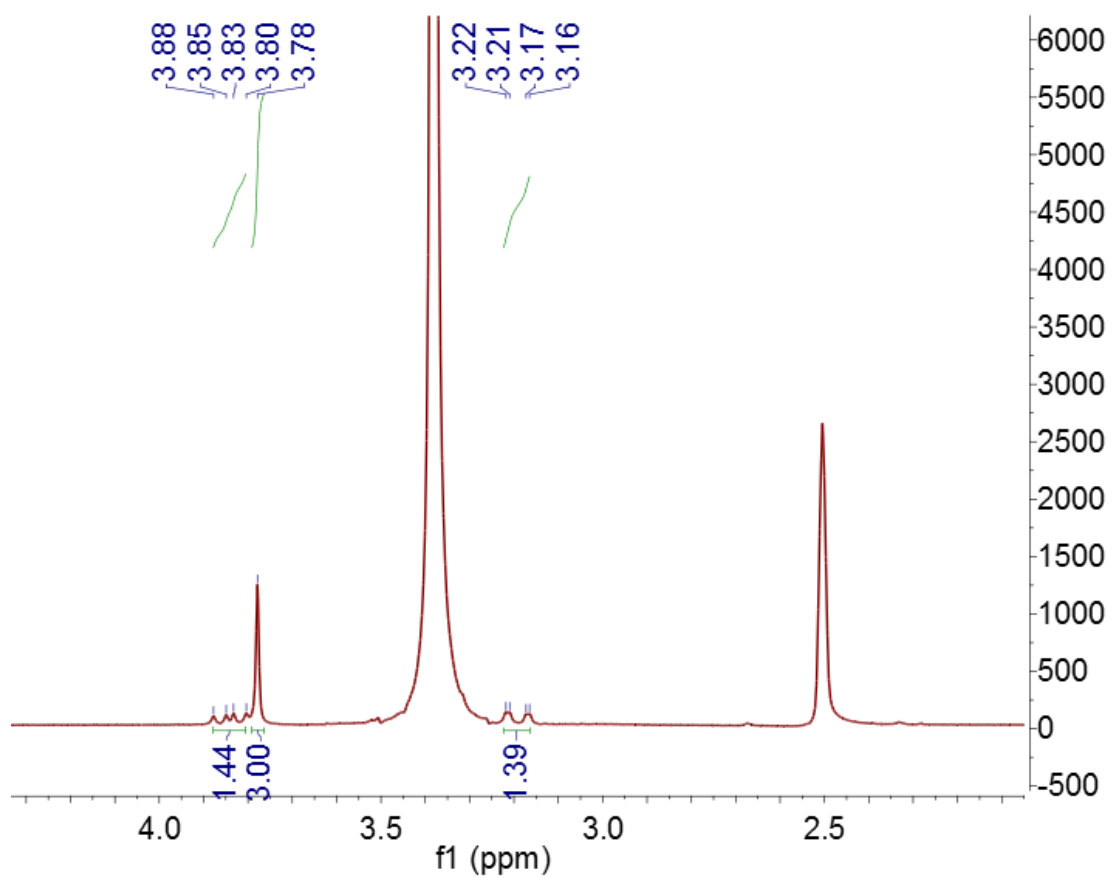

6b



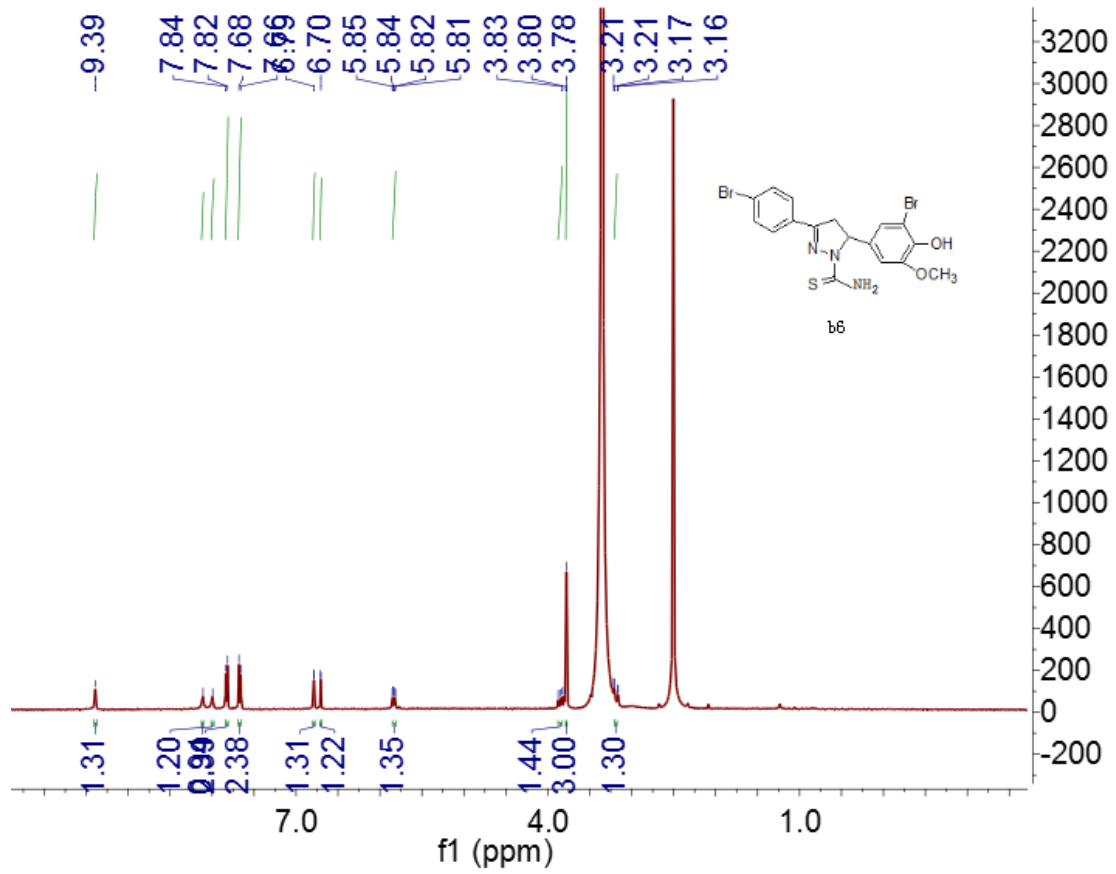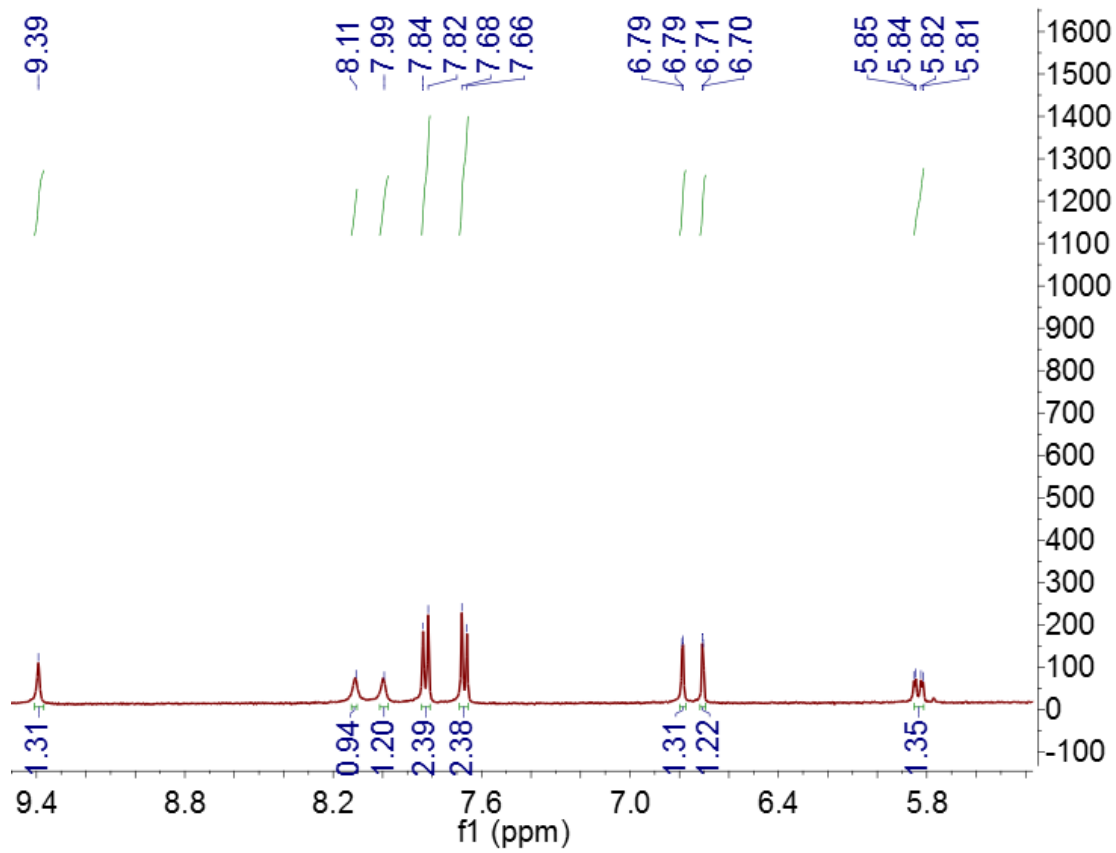

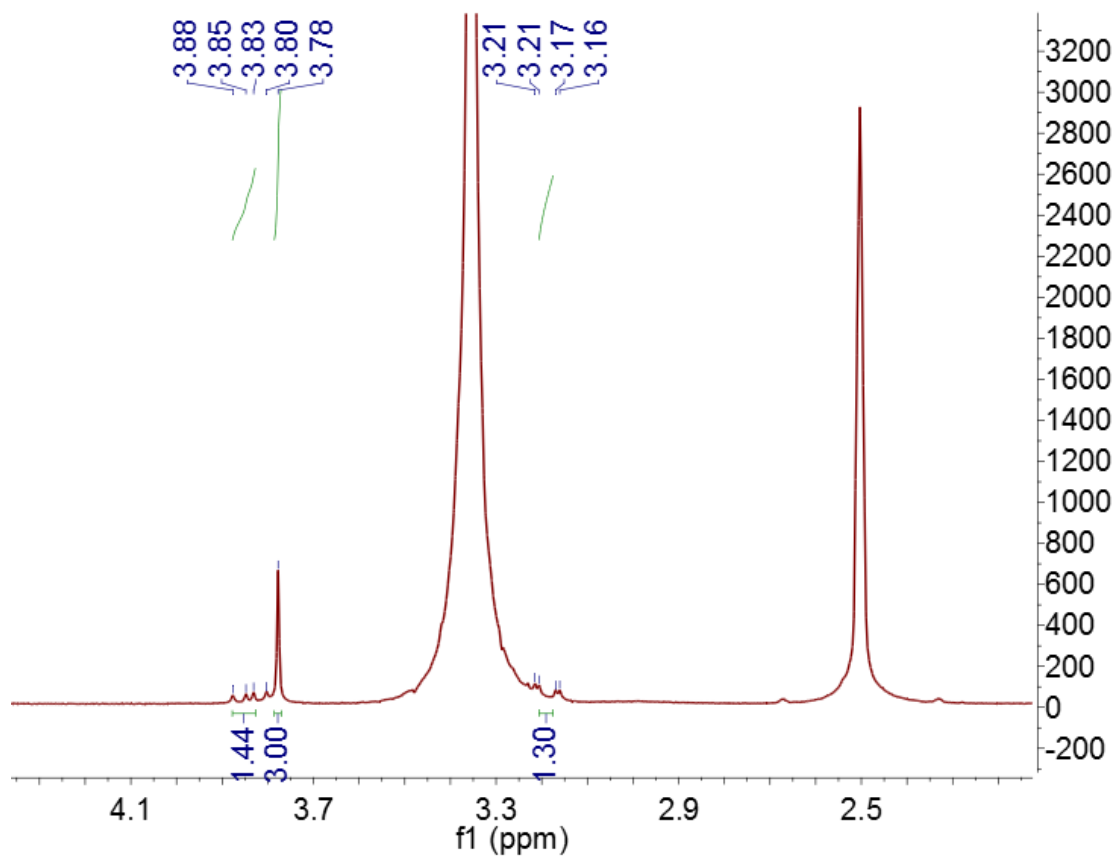

7b

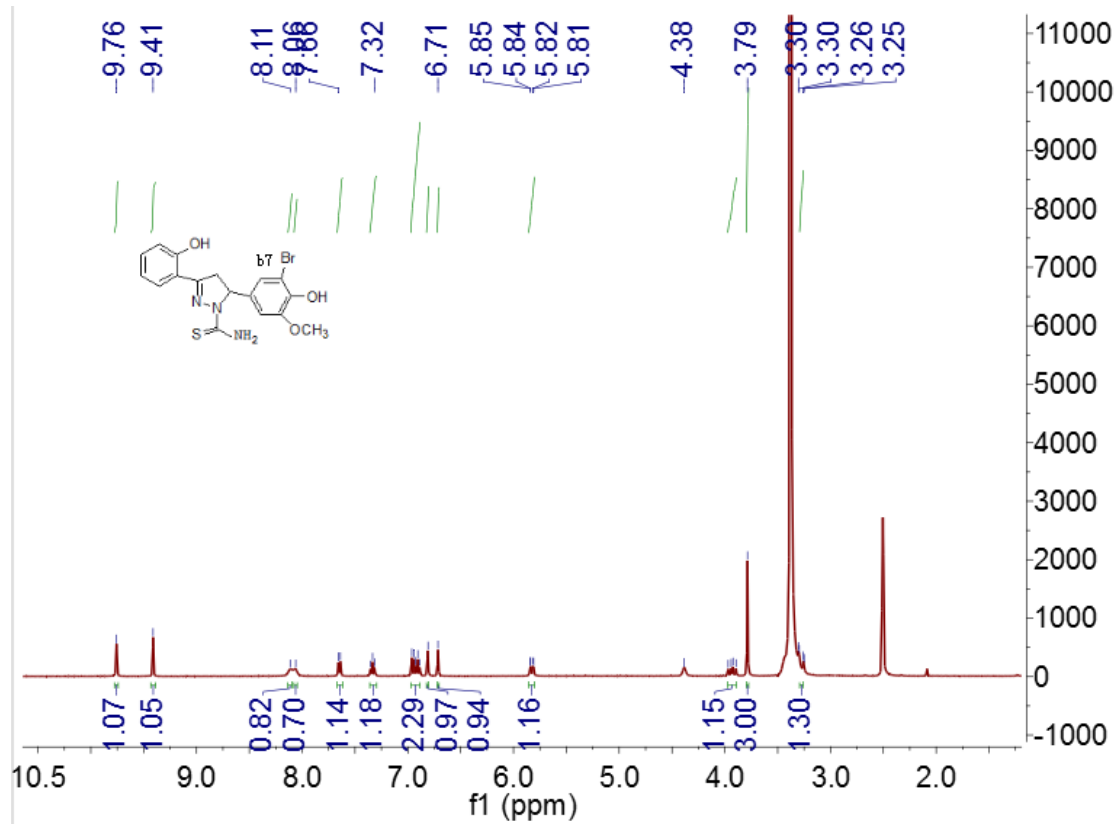

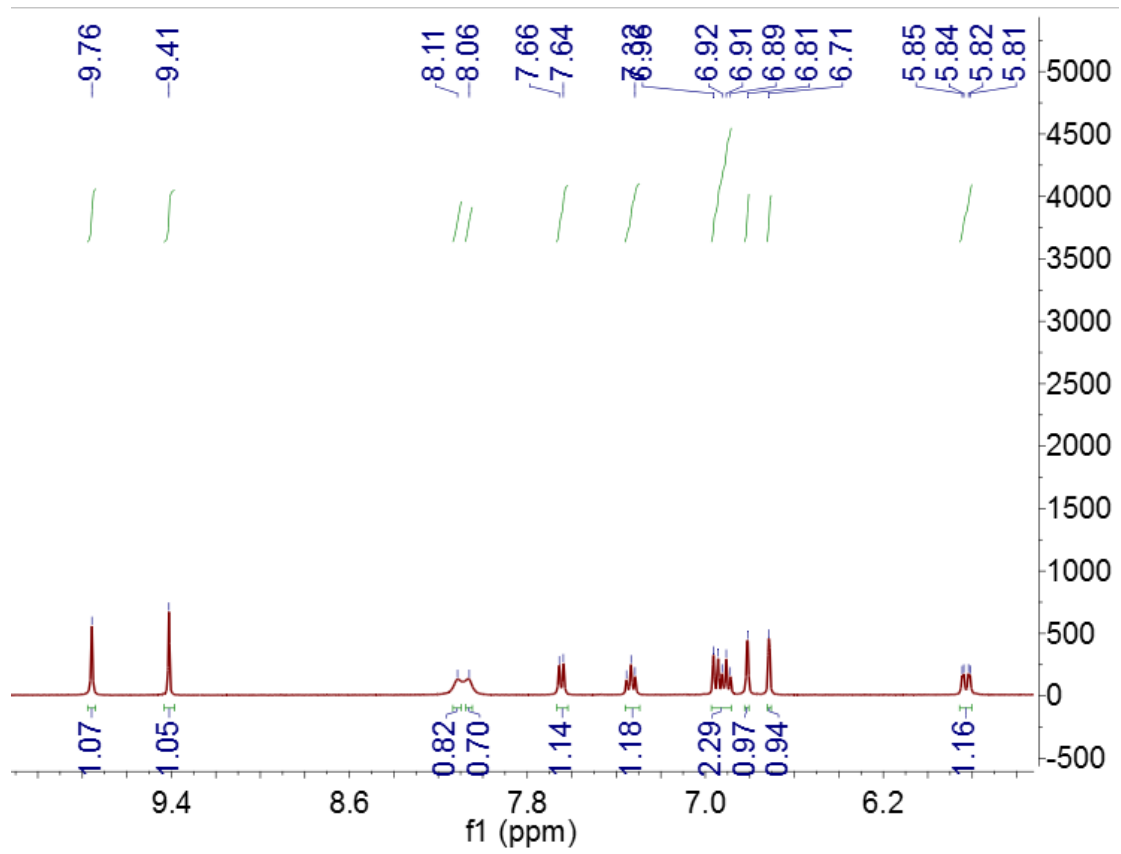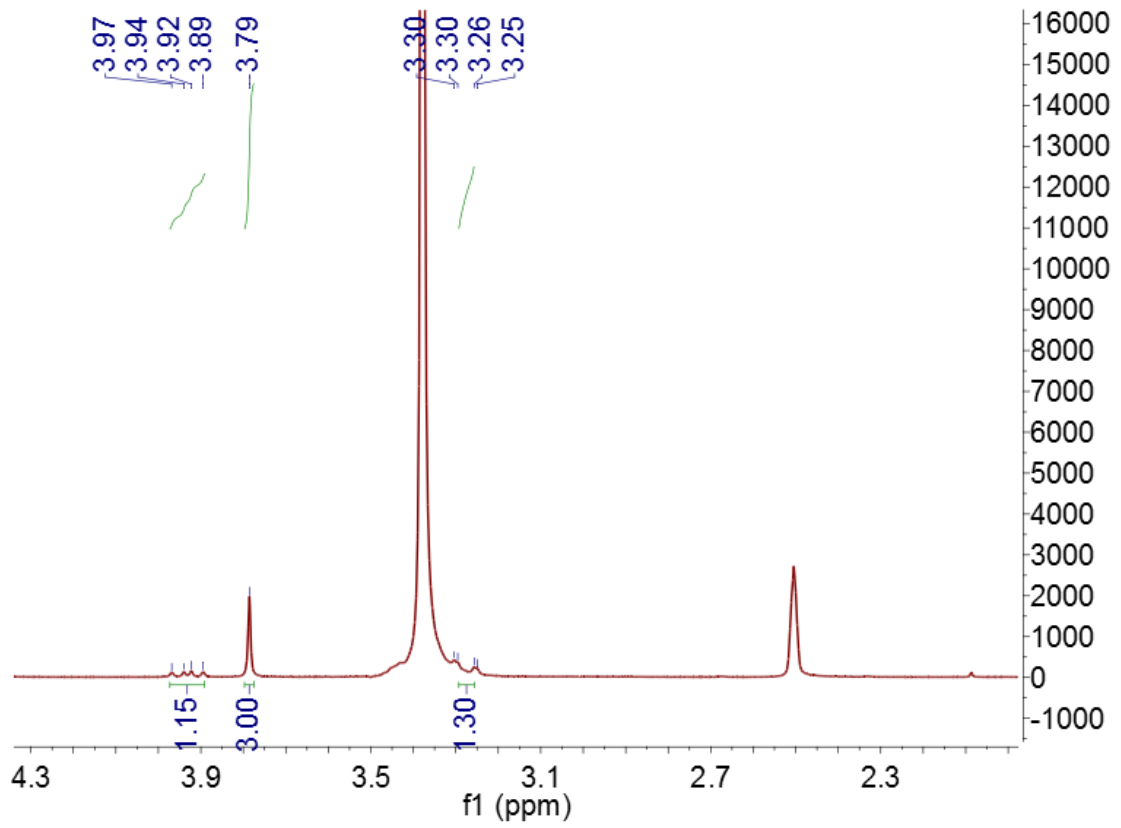

8b

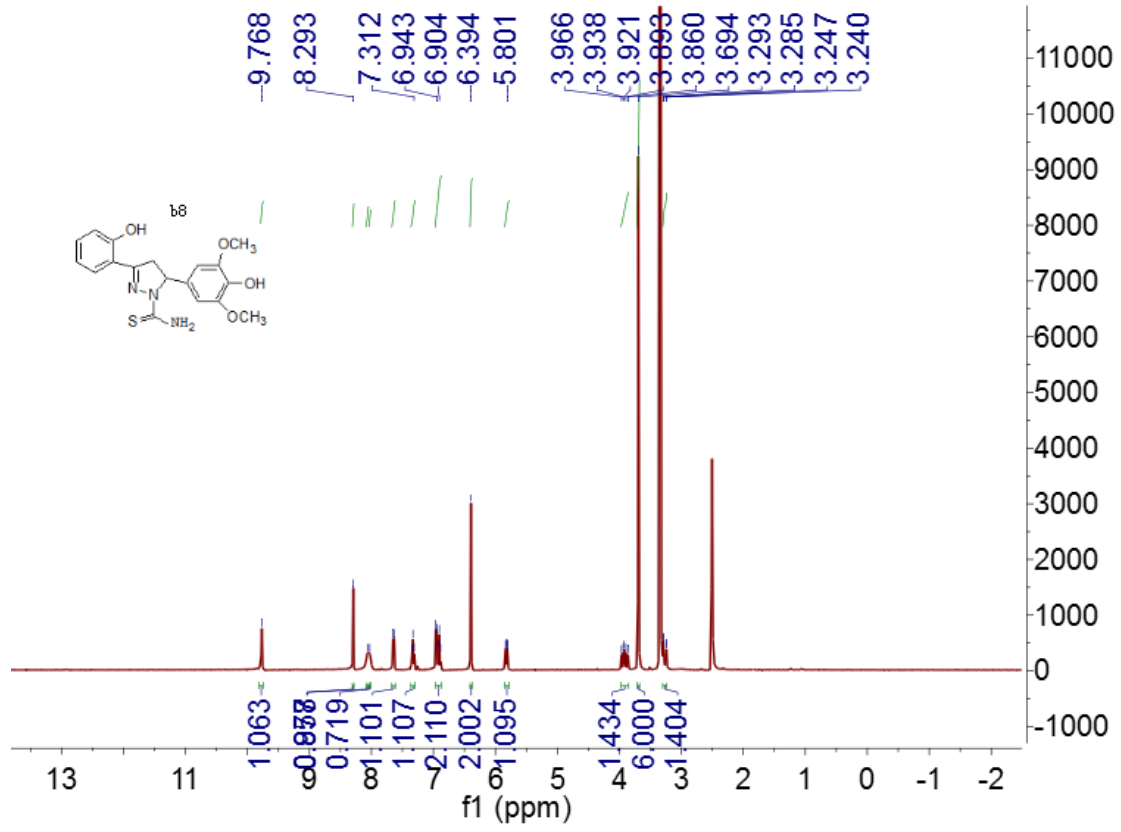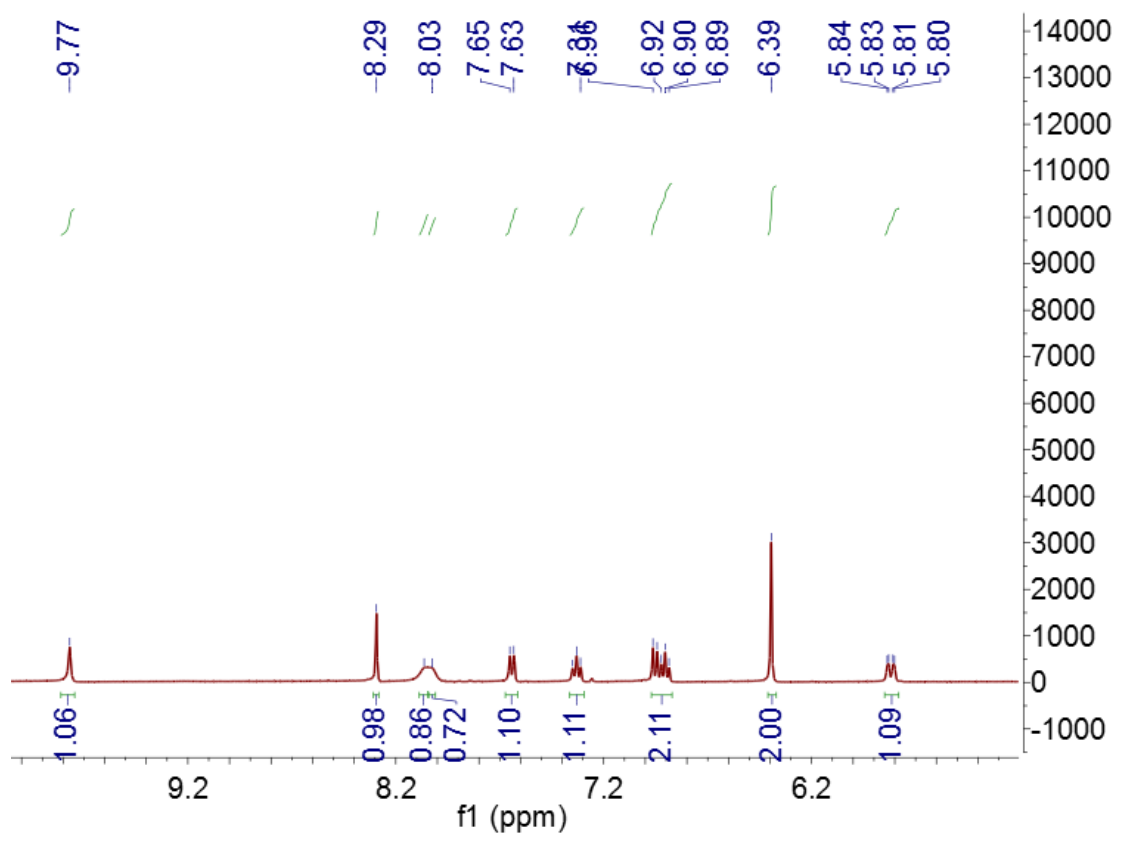

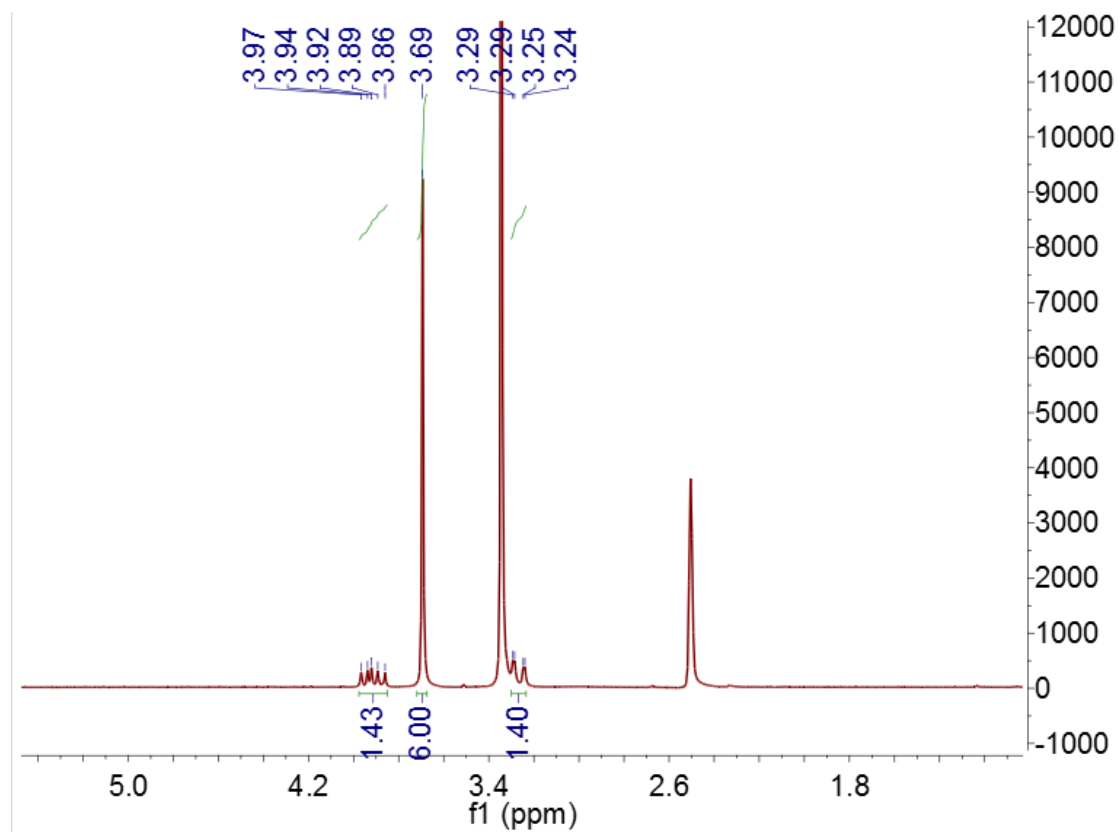

9b

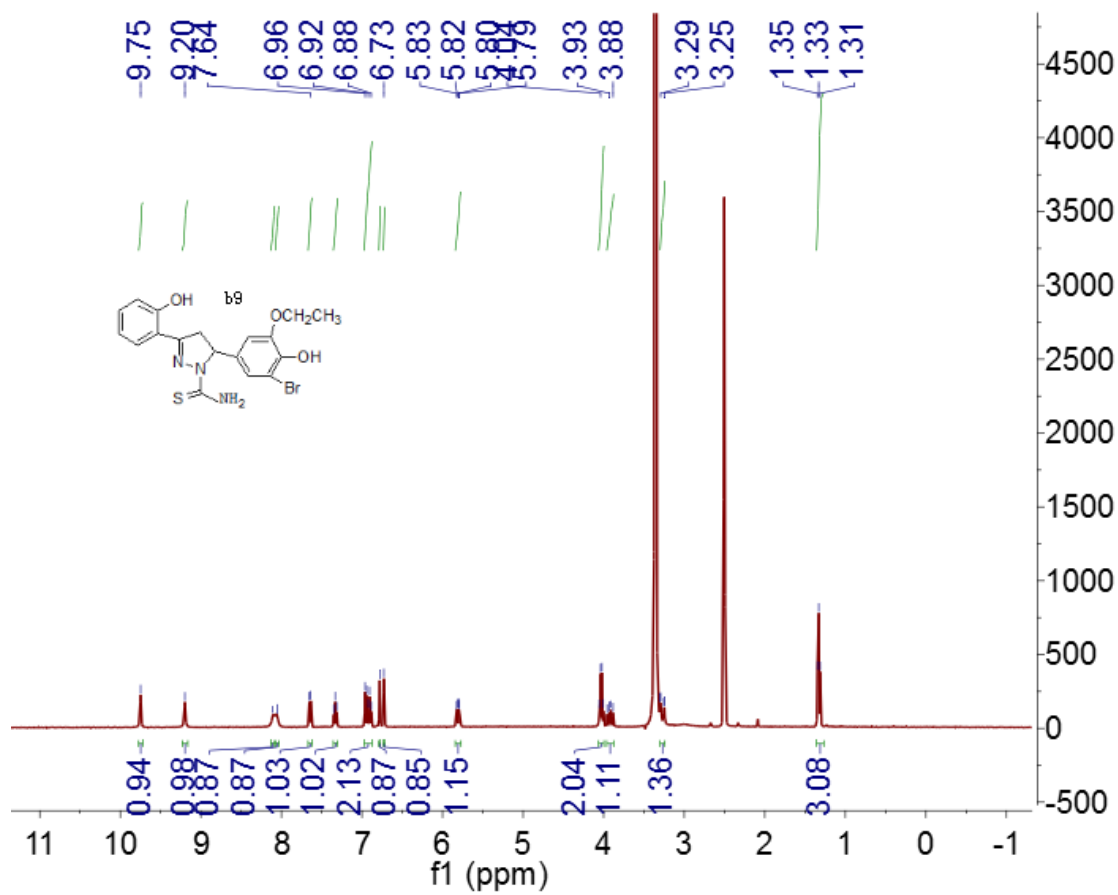

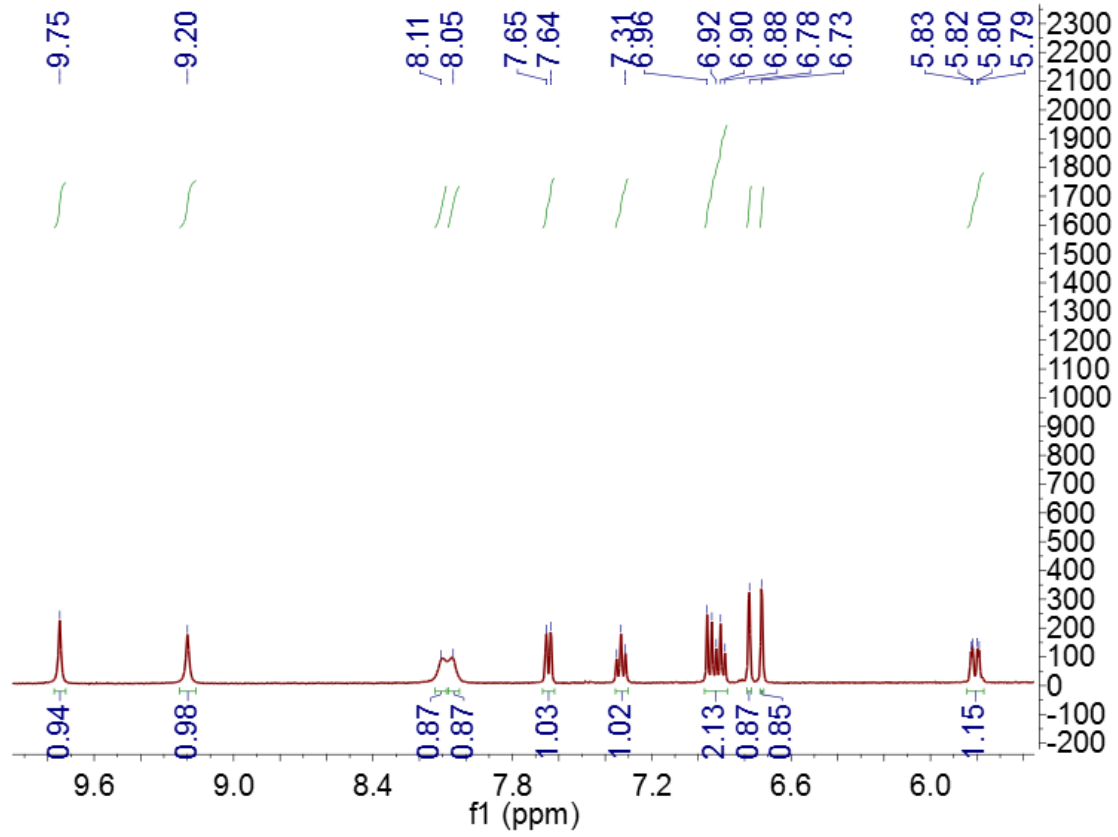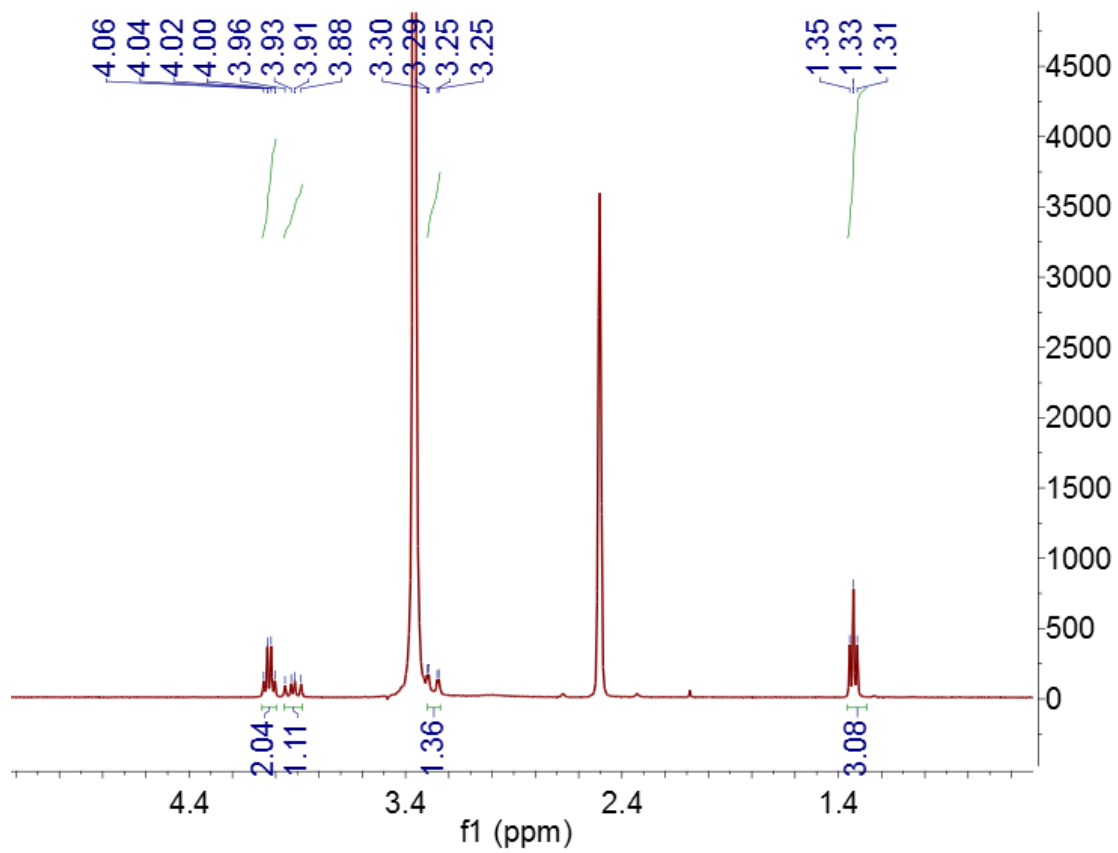

10b

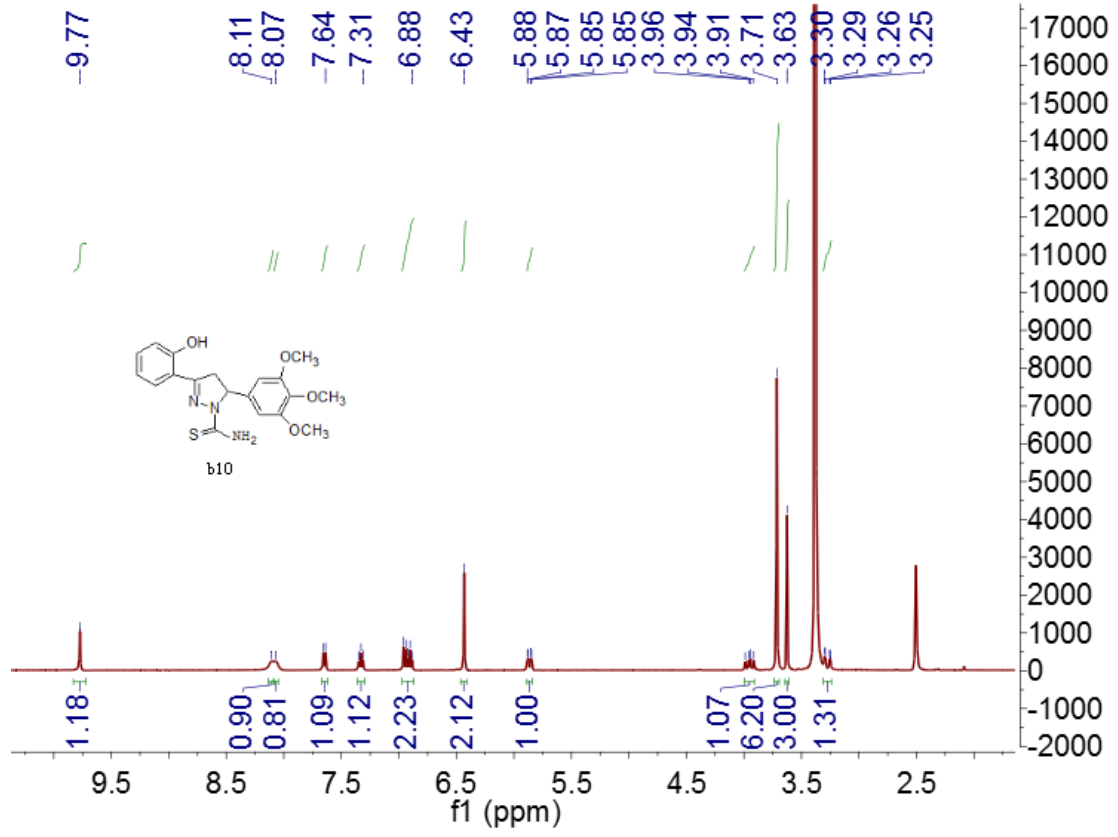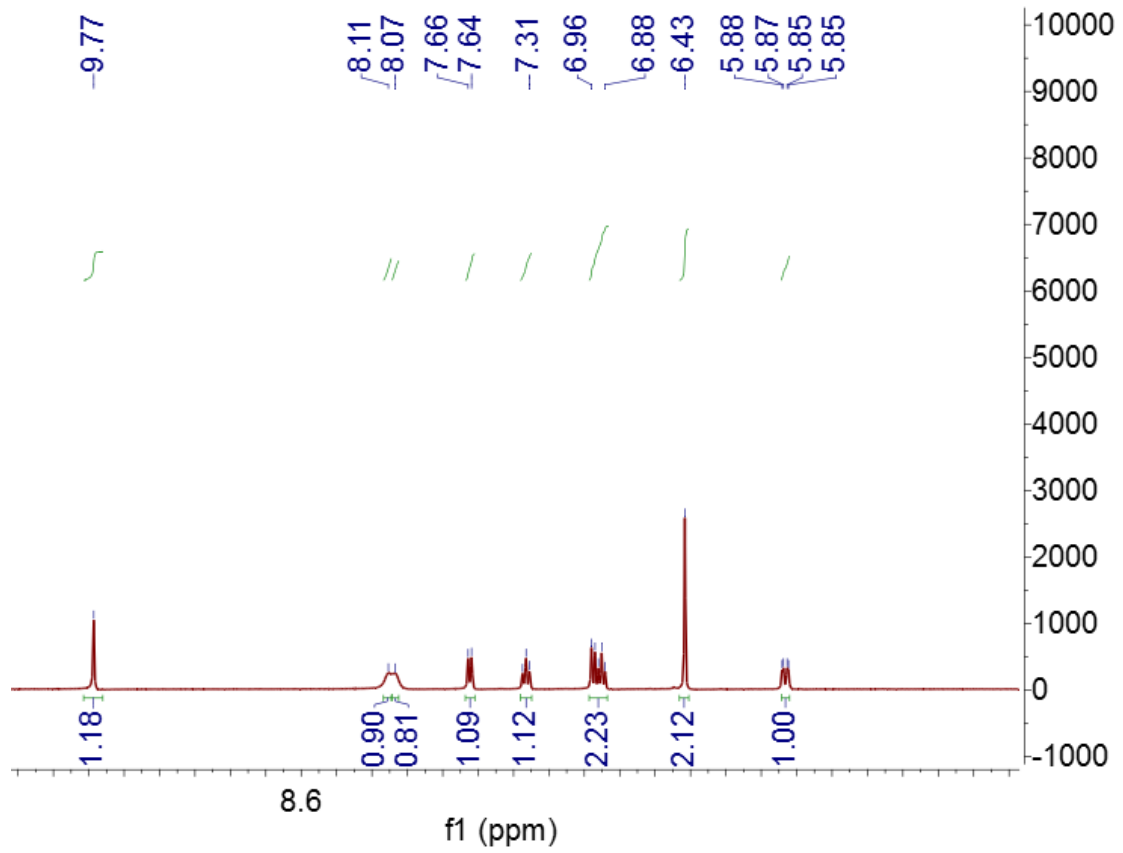

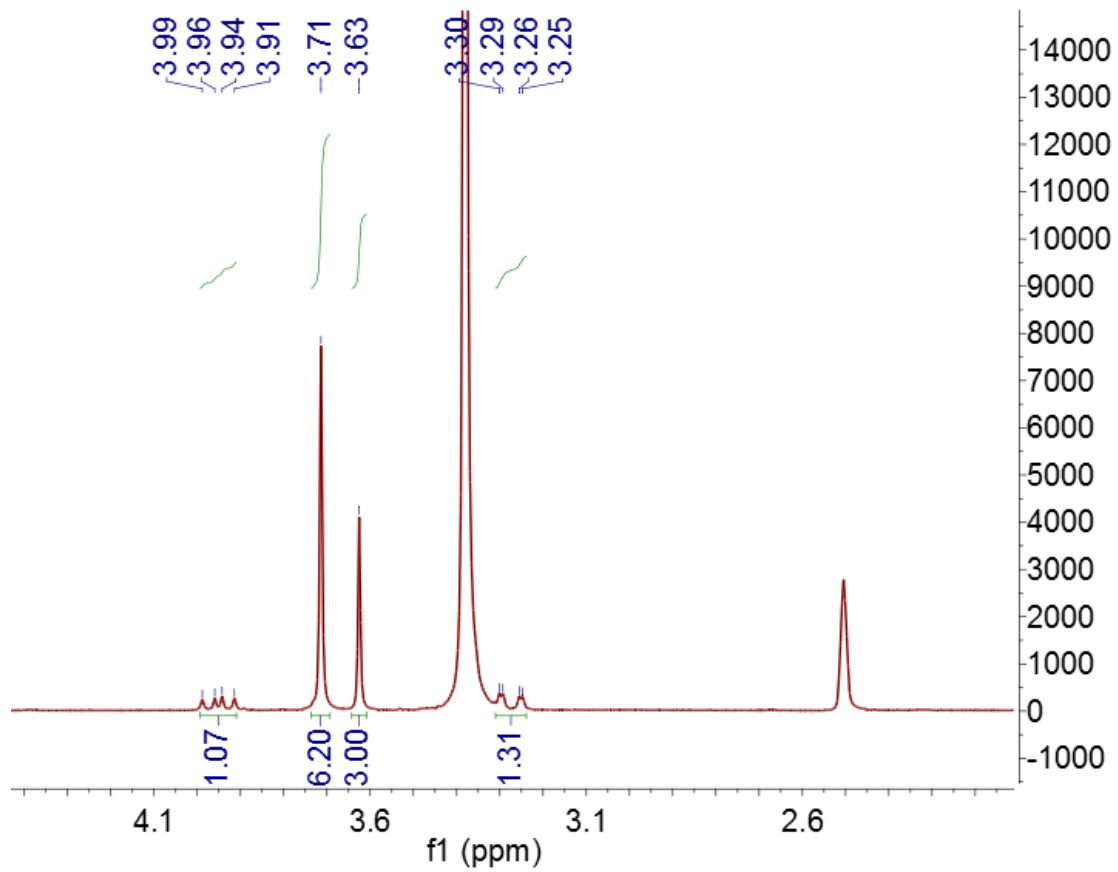

11b

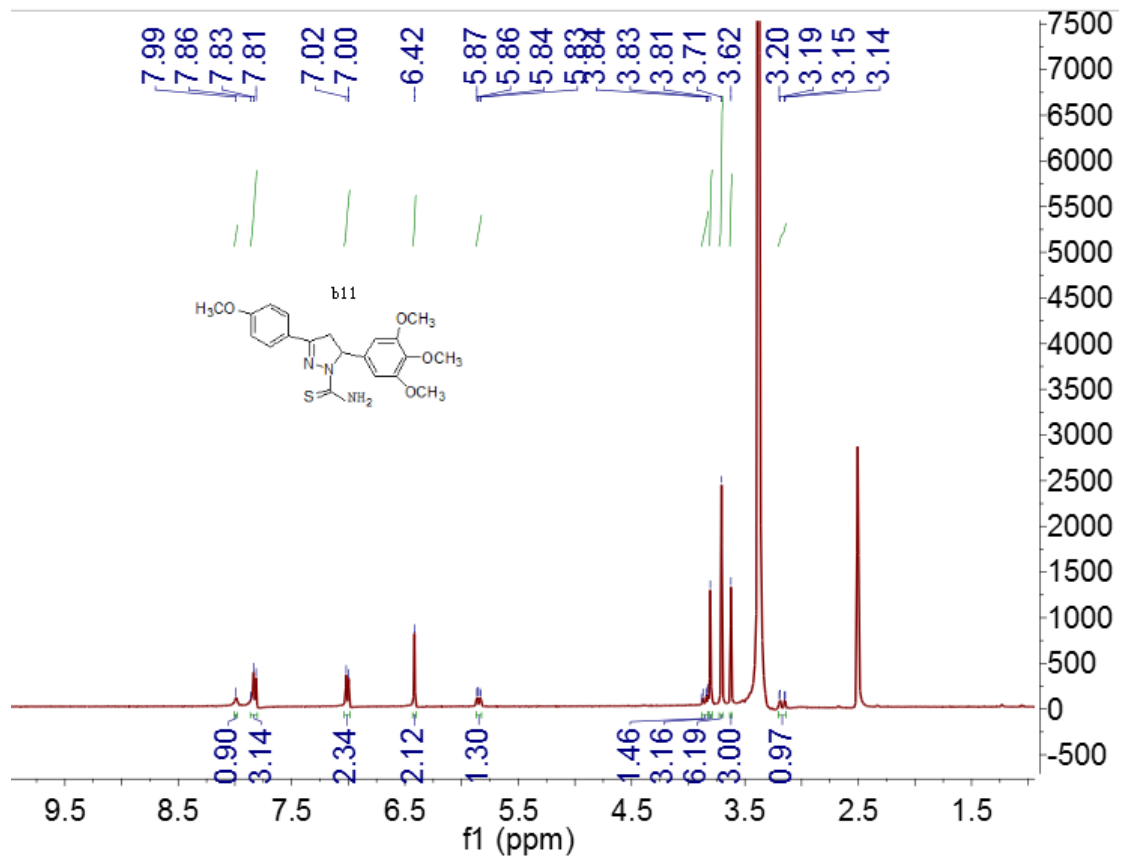



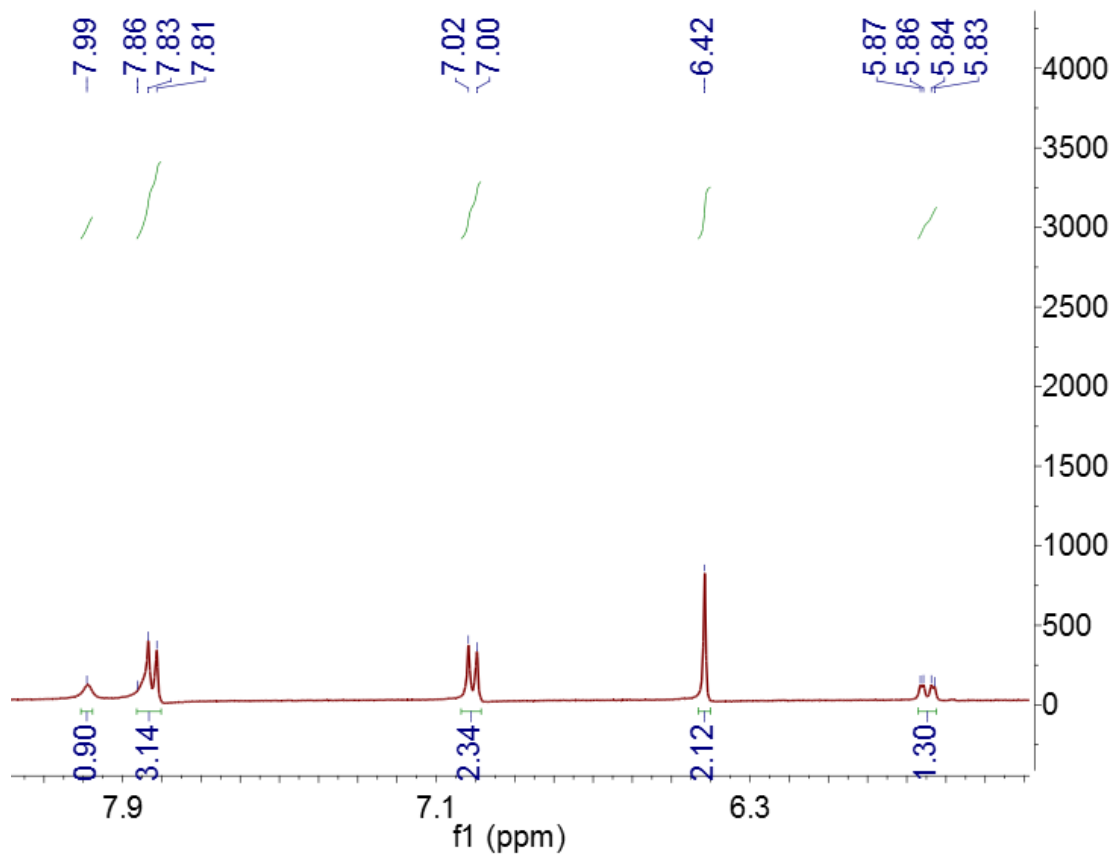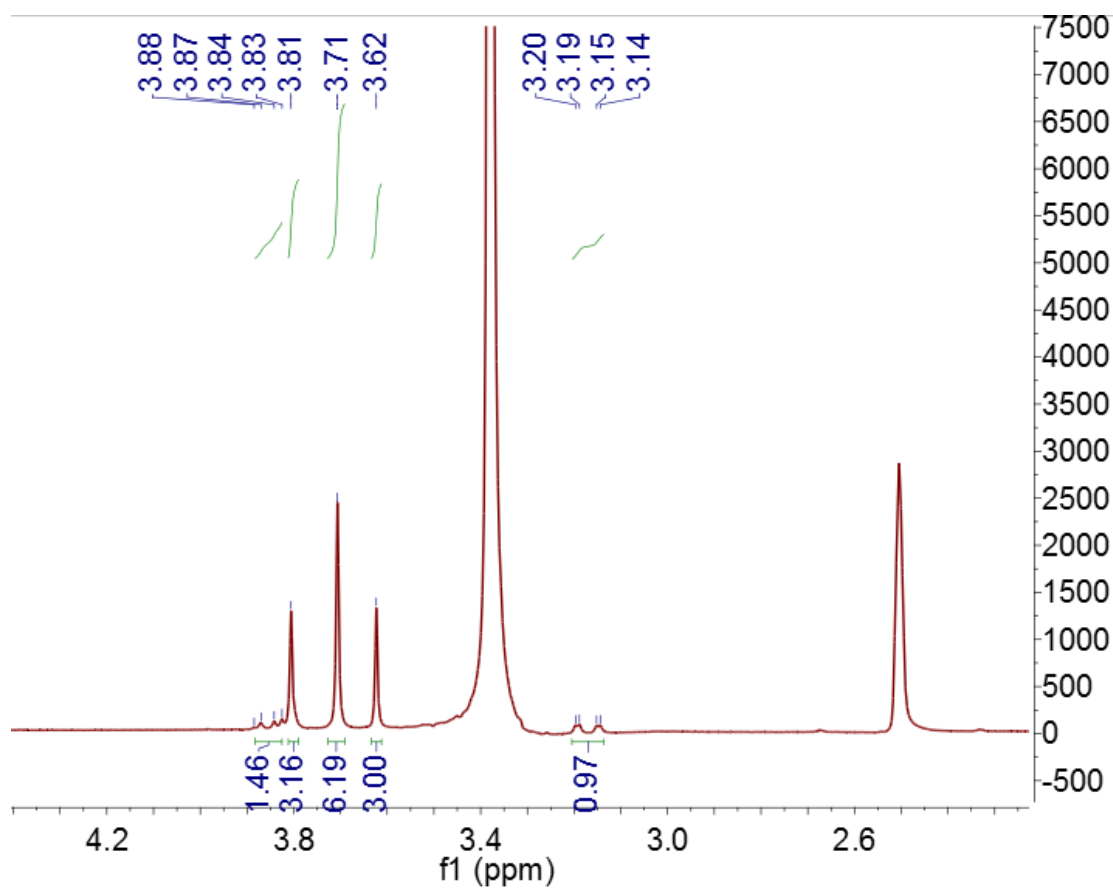

12b

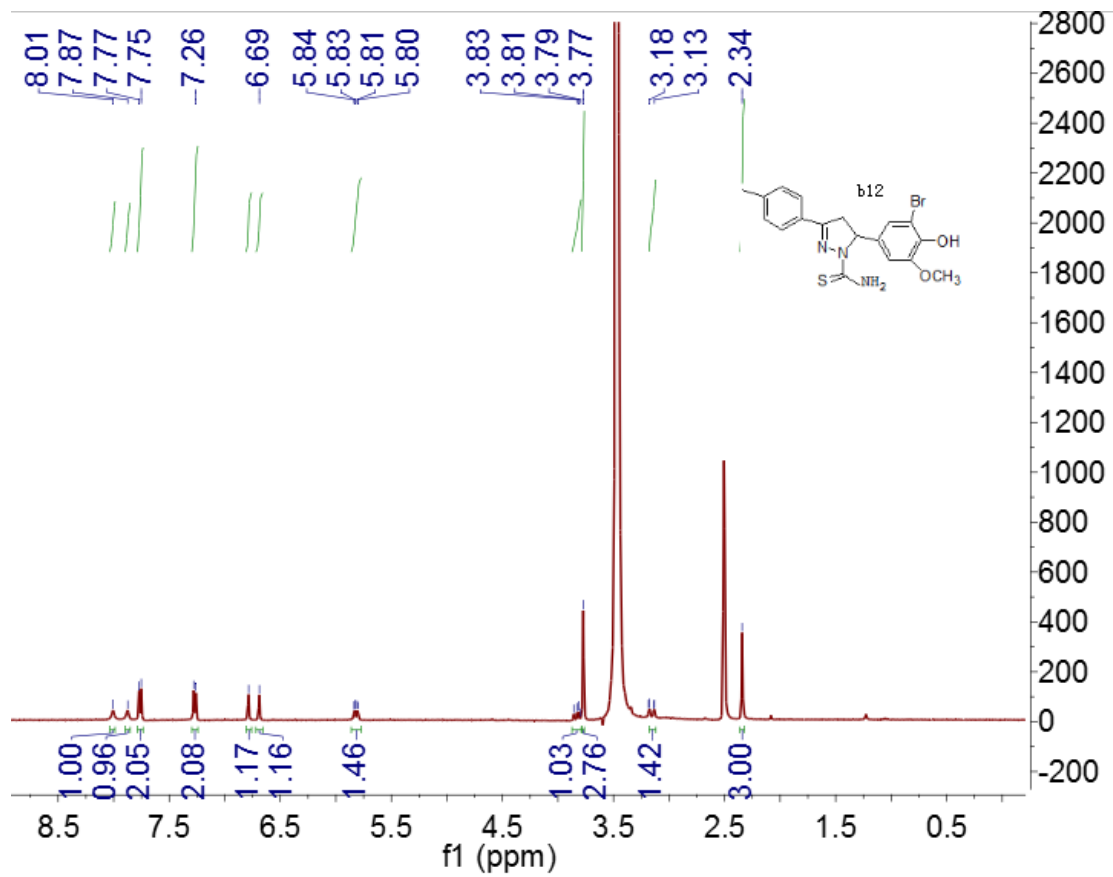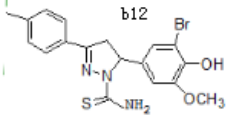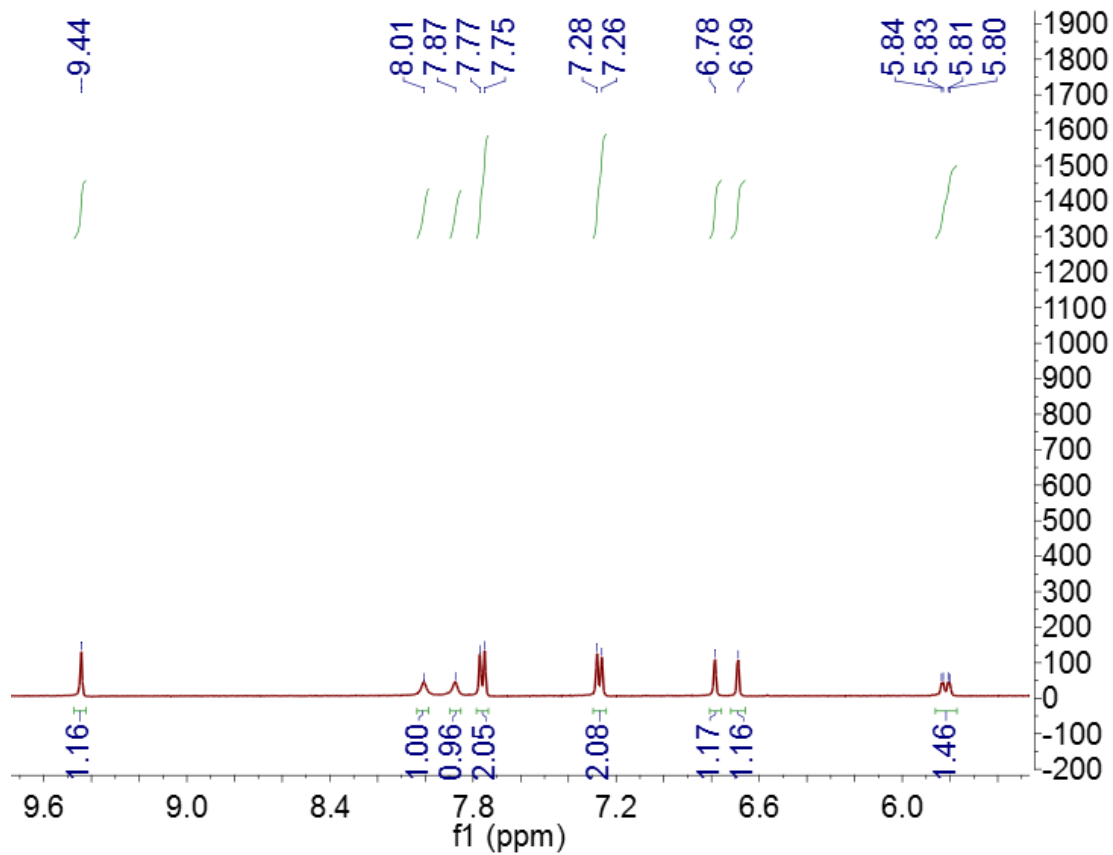

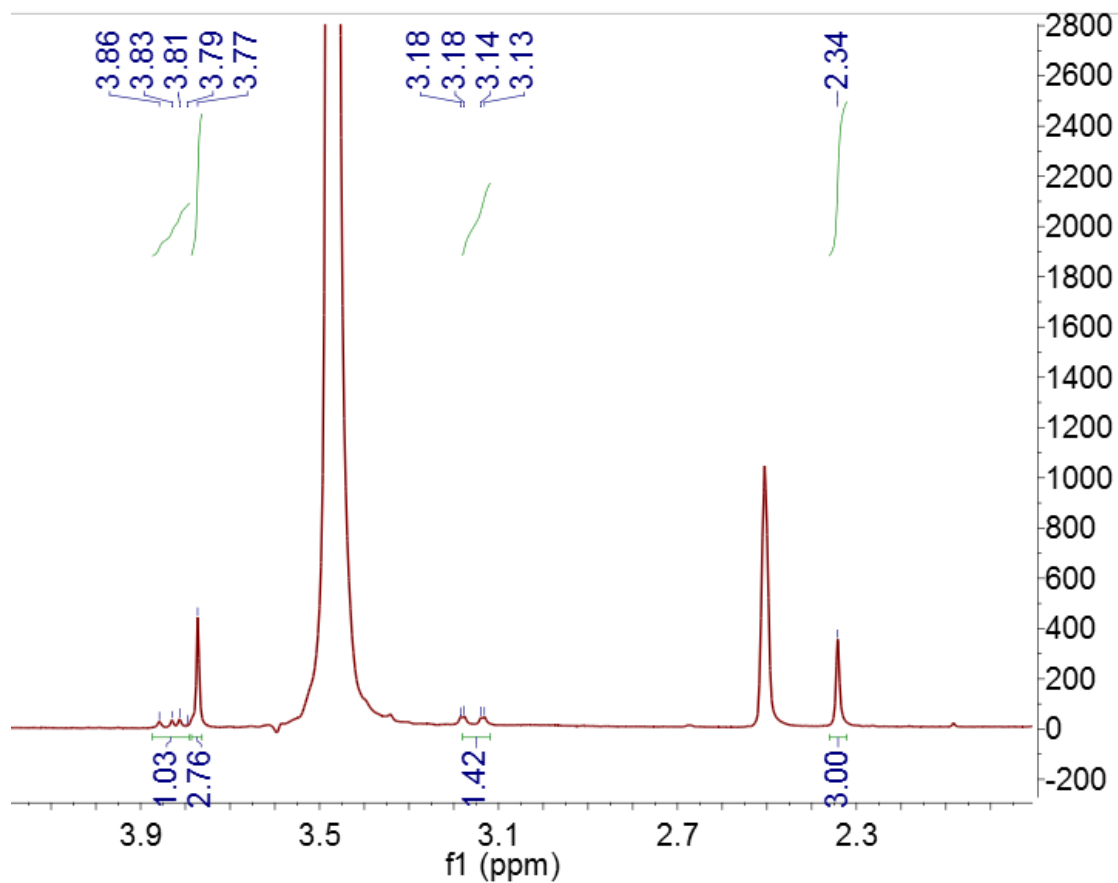

**Figure S2.** The representative  $^{13}\text{C}$  NMR of compound **1b** and compound **2b**.  
 $^{13}\text{C}$  NMR spectrum of compound **1b** and **2b** (150 MHz, DMSO)

**1b**

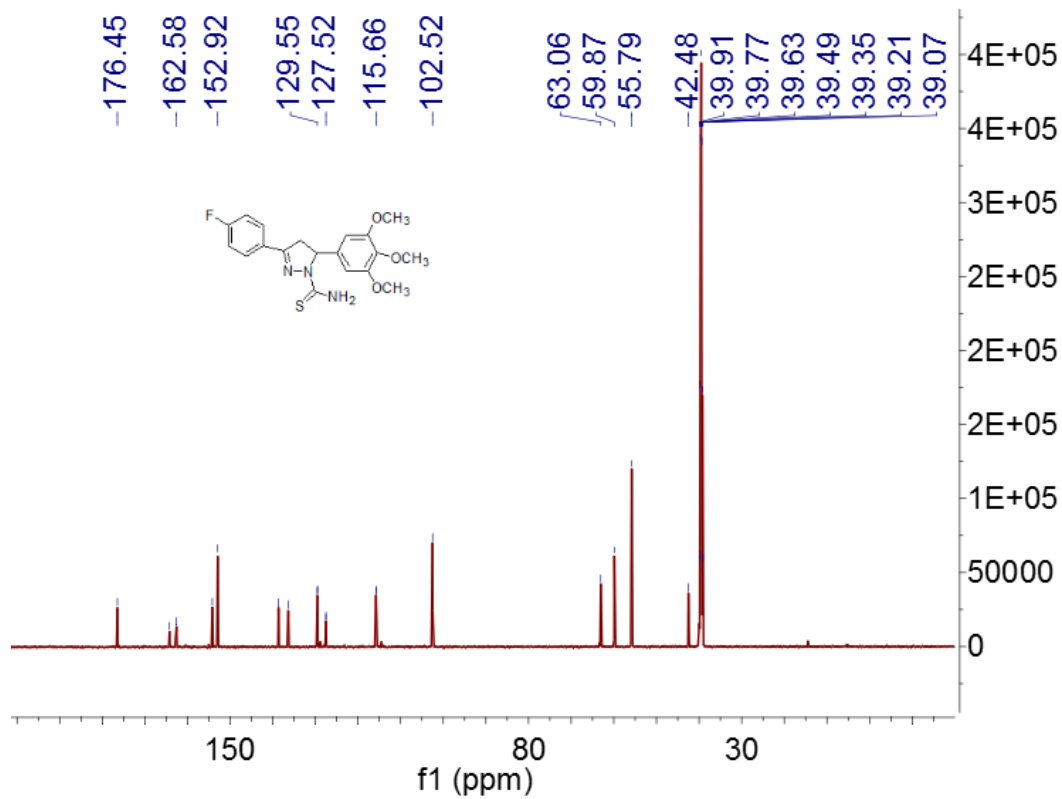

2b

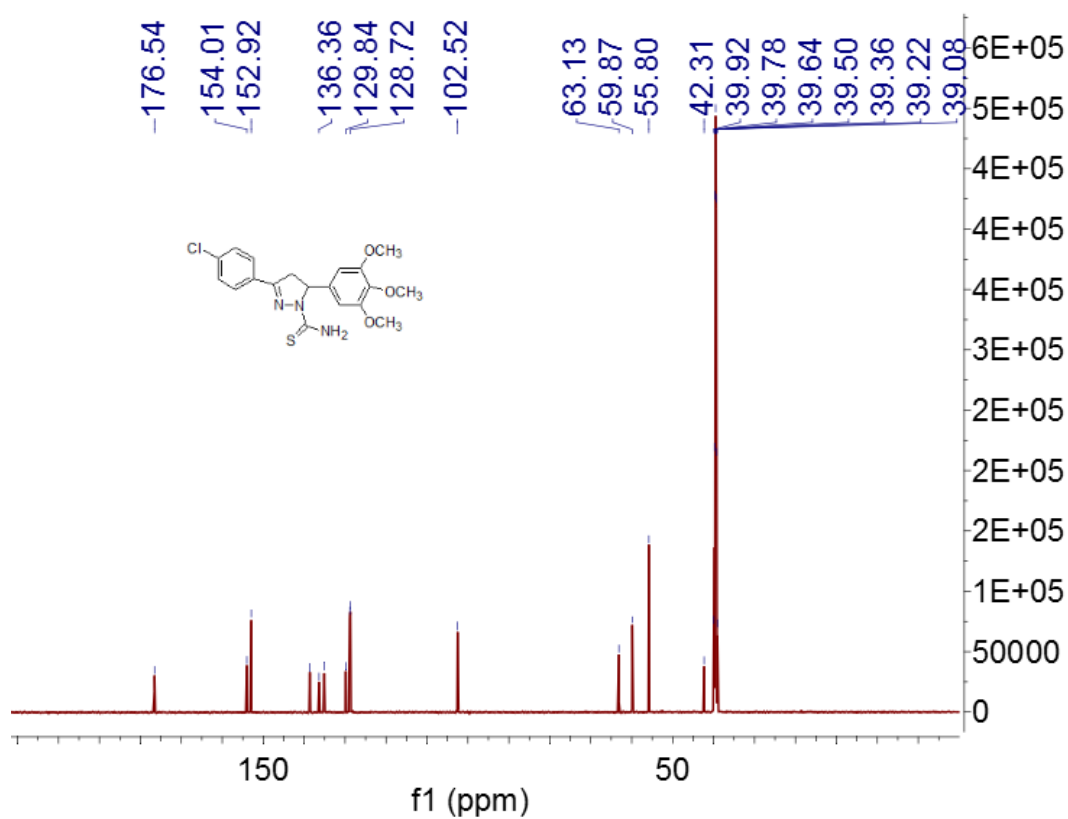

3b

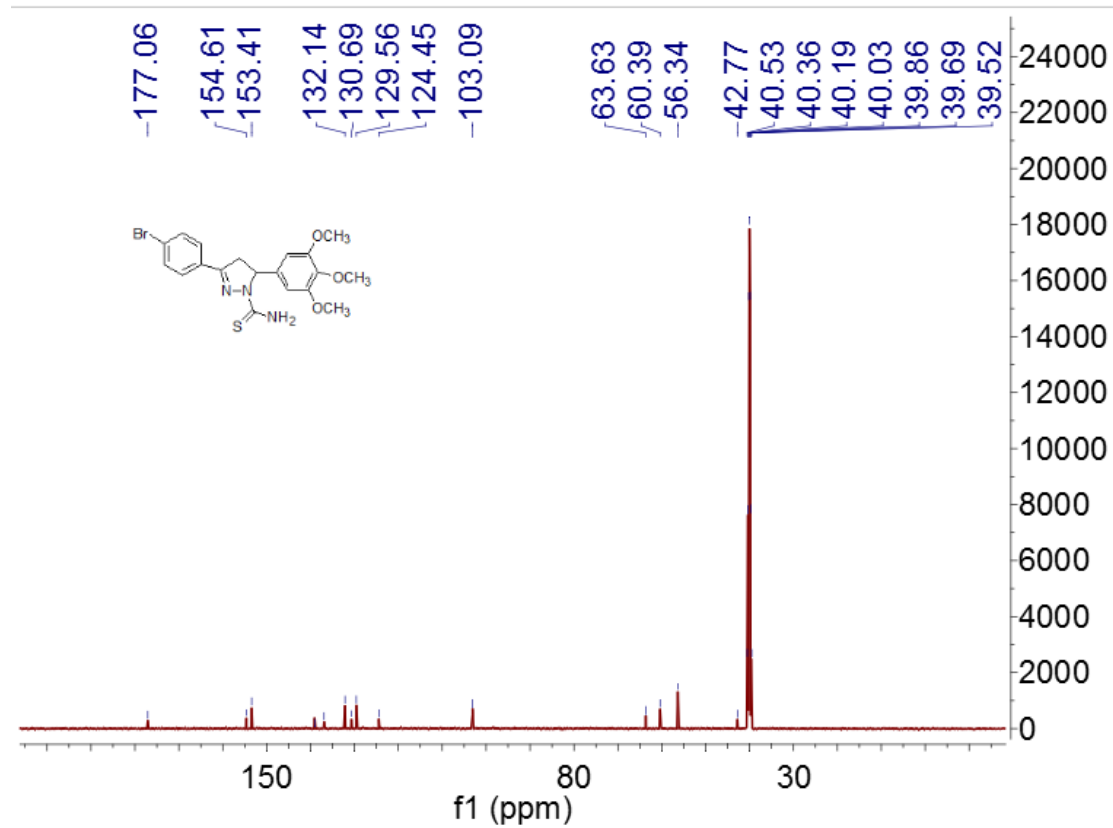

4b

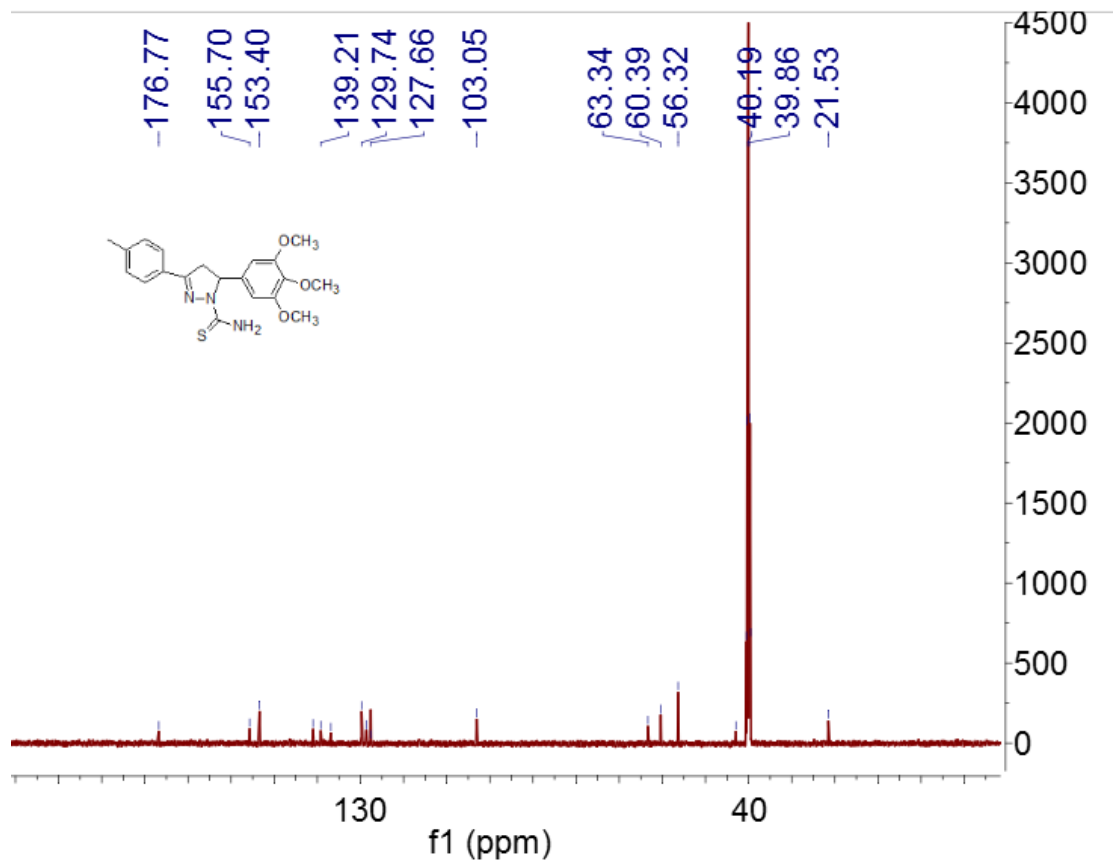

5b

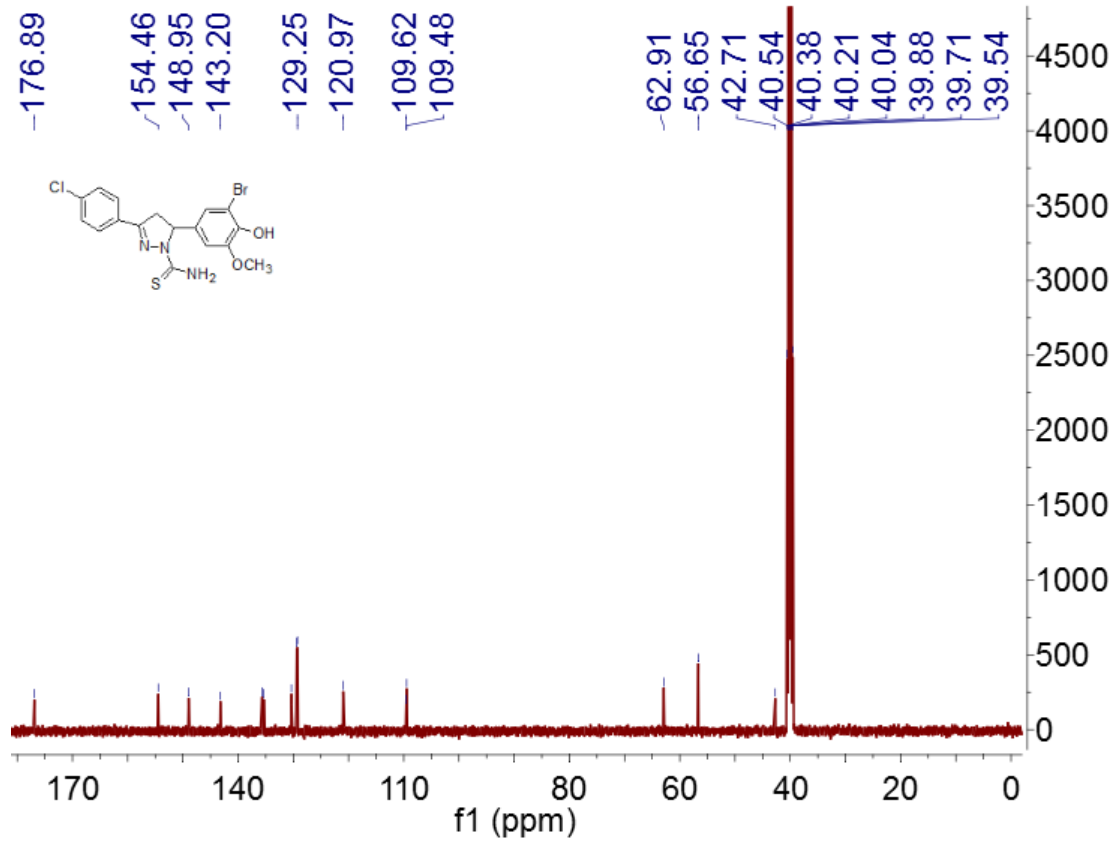

7b

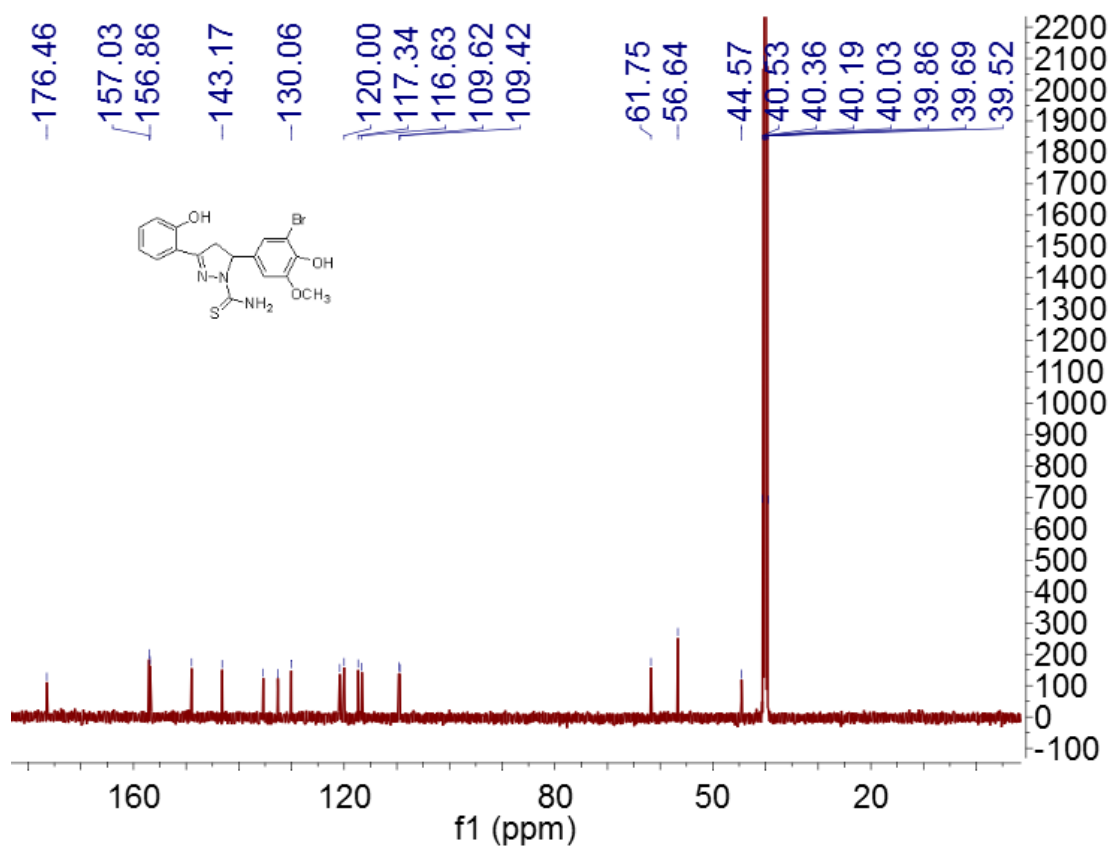

8b

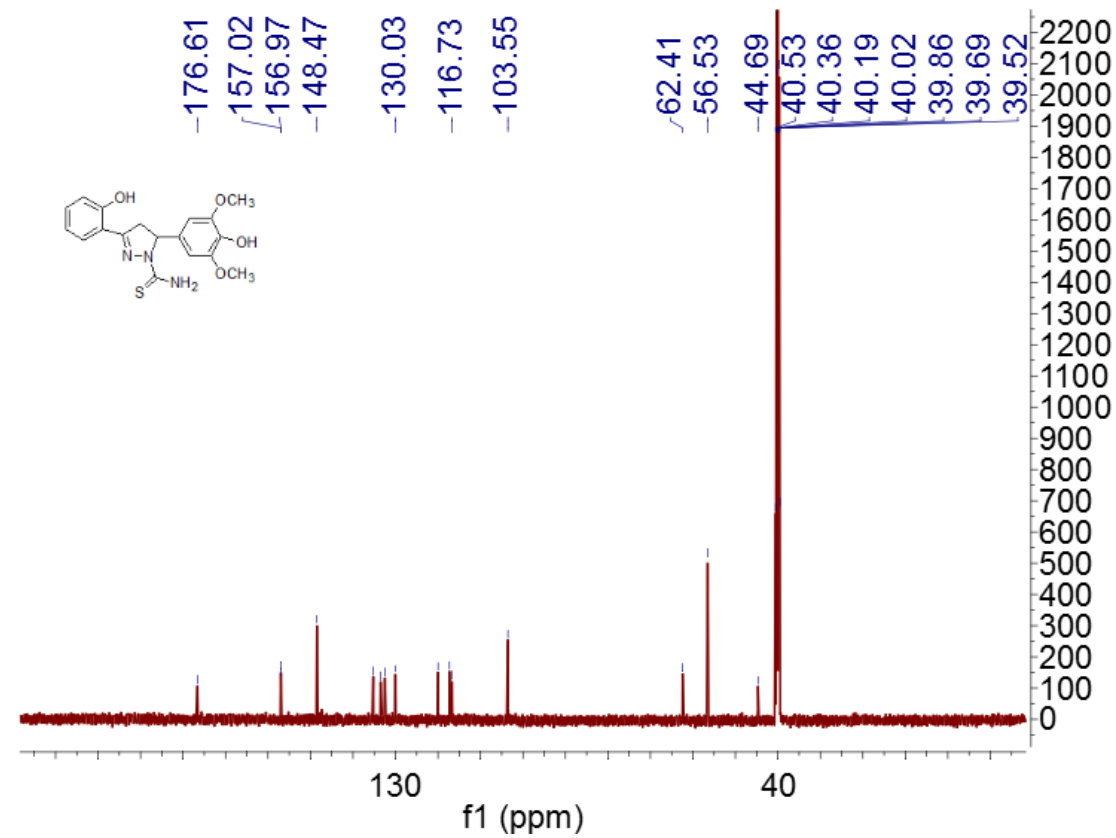

9b

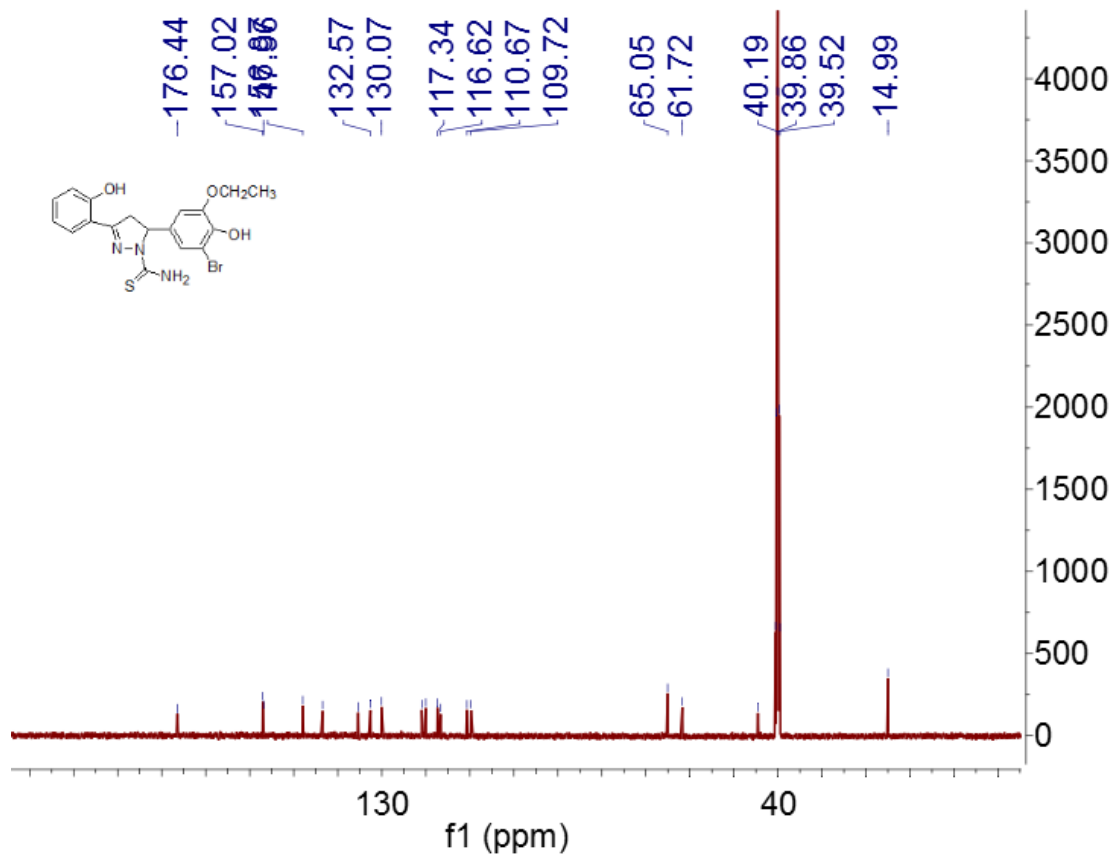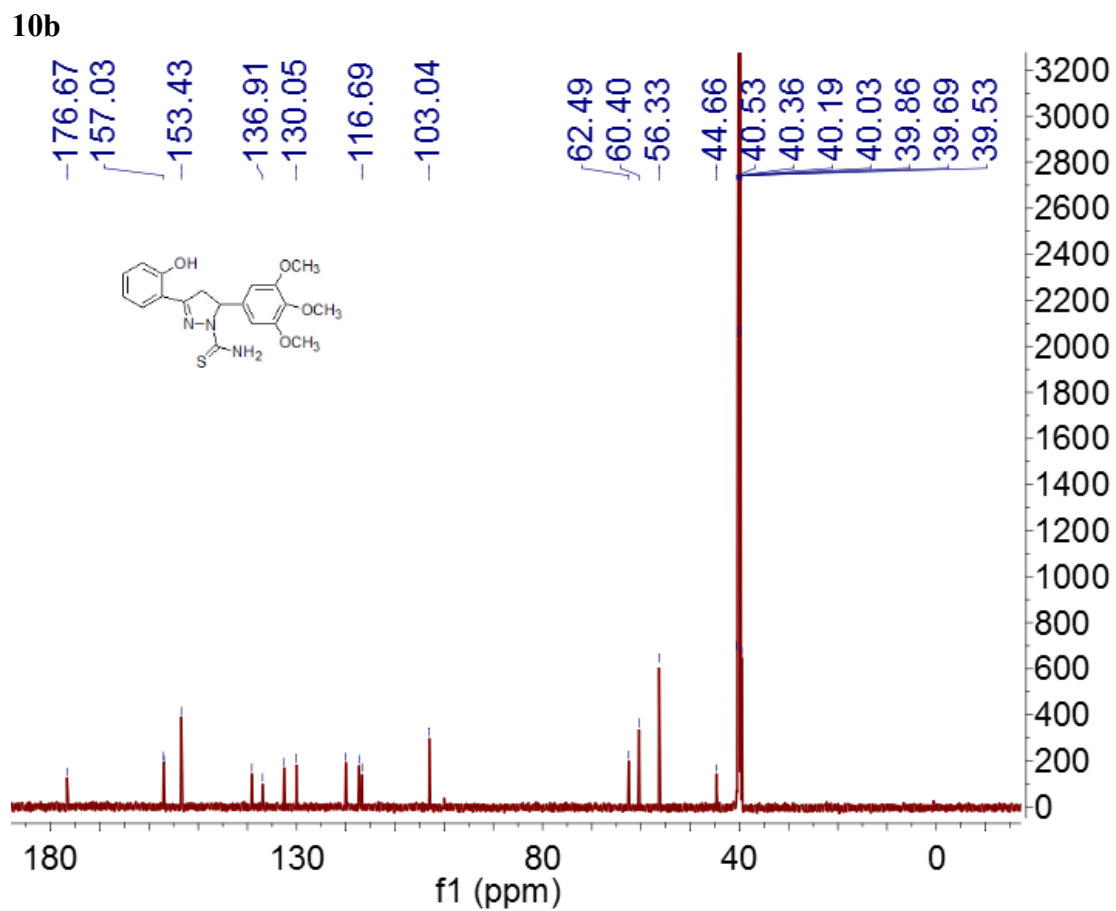

**11b**

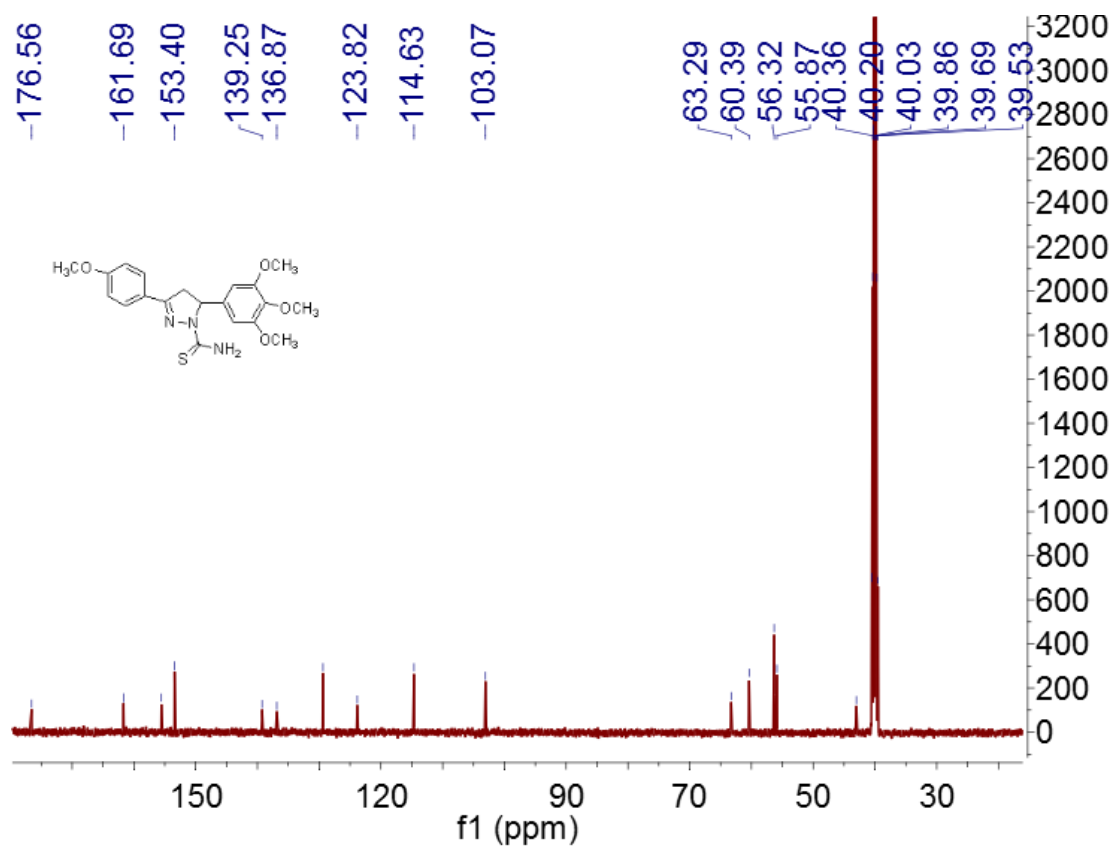

12b

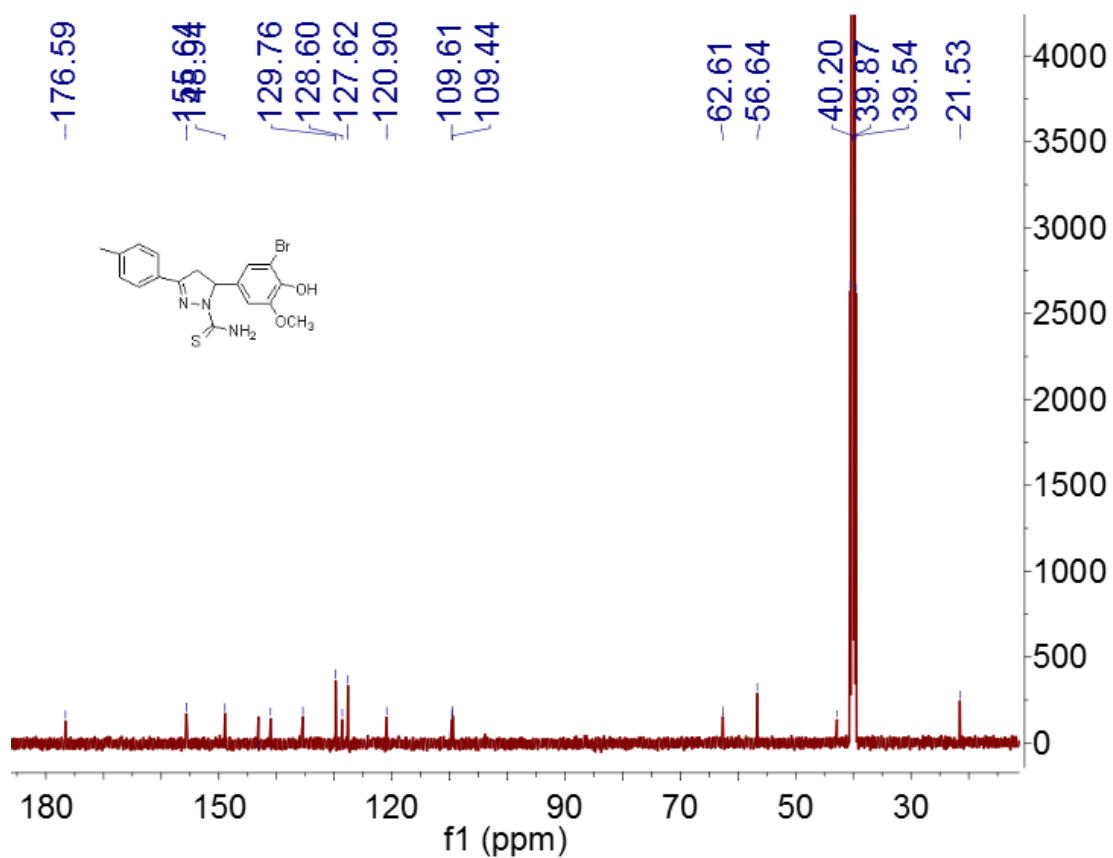

Figure S3. The representative HRMS (ESI) spectra of compound 1b-12b.



## HRMS (ESI) spectrum of compound 1b

2017022801\_170228104051 #9 RT: 0.09 AV: 1 NL: 3.43E7  
T: FTMS + p ESI Full ms [50.00-750.00]

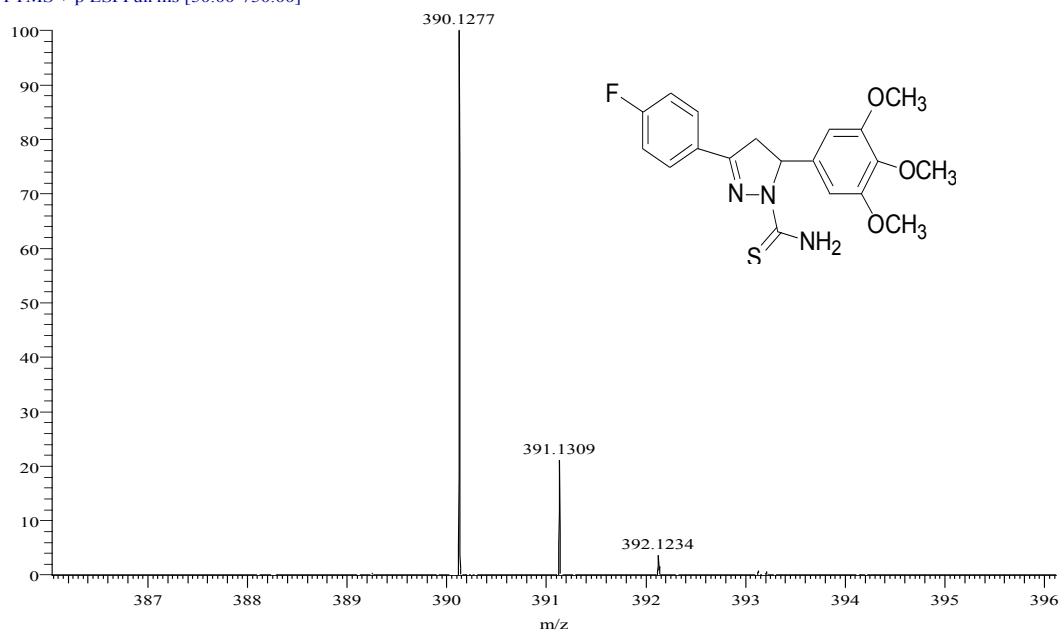

### Elemental Composition calculator

| Target M/Z                                                       | 390.1277                                           | Result type: | Positive  | Species: | [M+H] <sup>+</sup> |
|------------------------------------------------------------------|----------------------------------------------------|--------------|-----------|----------|--------------------|
| Elements:                                                        | C(0-40); H(0-80); O(0-10); N(0-10); F(0-1); S(0-1) |              |           |          |                    |
| Ion Formula                                                      | Calculated M/Z                                     |              | PPM error |          |                    |
| C <sub>19</sub> H <sub>21</sub> N <sub>3</sub> O <sub>3</sub> FS | 390.1282                                           |              | -1.28     |          |                    |

## HRMS (ESI) spectrum of compound 2b

2017022802\_170228104600 #11 RT: 0.10 AV: 1 NL: 8.29E7  
T: FTMS + p ESI Full ms [50.00-750.00]

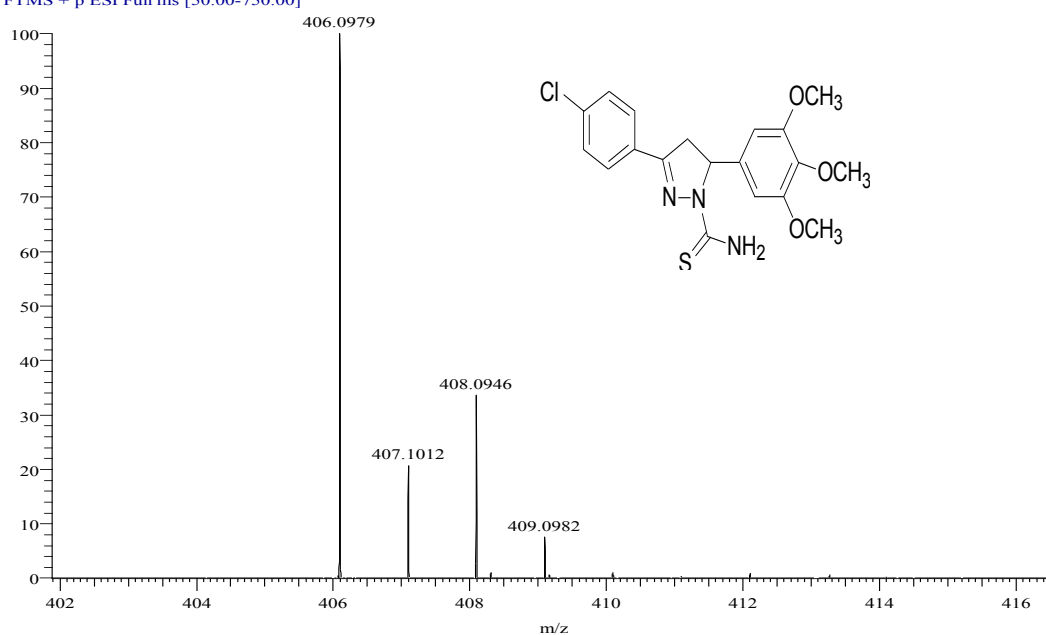

### Elemental Composition calculator

|                                                                   |                                                     |              |           |          |                    |
|-------------------------------------------------------------------|-----------------------------------------------------|--------------|-----------|----------|--------------------|
| Target M/Z                                                        | 406.0979                                            | Result type: | Positive  | Species: | [M+H] <sup>+</sup> |
| Elements:                                                         | C(0-40); H(0-80); O(0-10); N(0-10); Cl(0-1); S(0-1) |              |           |          |                    |
| Ion Formula                                                       | Calculated M/Z                                      |              | PPM error |          |                    |
| C <sub>19</sub> H <sub>21</sub> N <sub>3</sub> O <sub>3</sub> SCl | 406.0987                                            |              | -1.97     |          |                    |

### HRMS (ESI) spectrum of compound 3b

Mazhengyue-b3 #15 RT: 0.15 AV: 1 NL: 9.17E7  
T: FTMS + p ESI Full ms [100.00-1500.00]

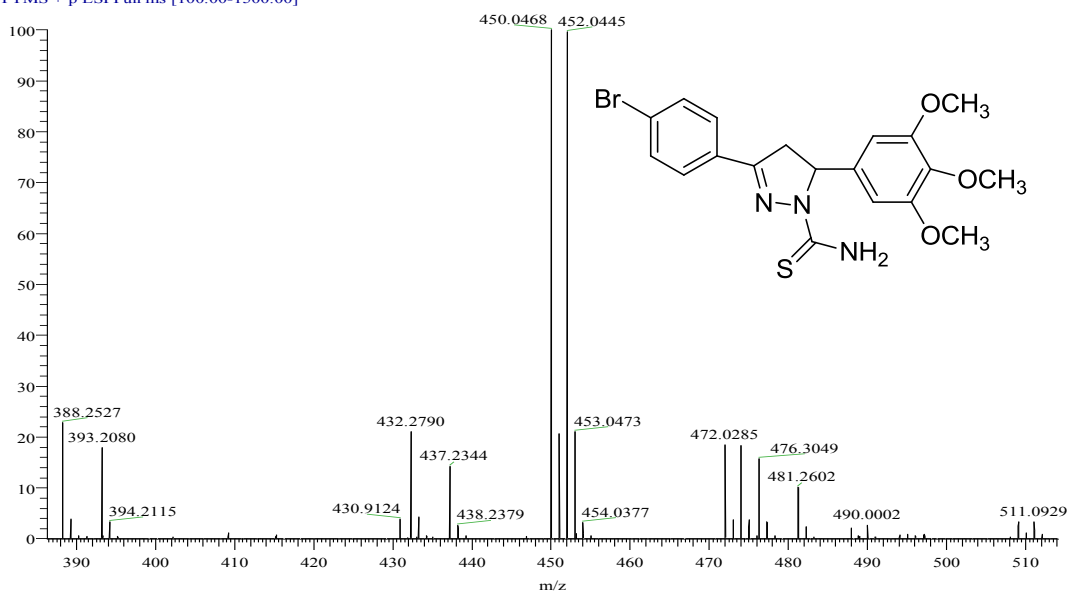

### Elemental Composition calculator

|                                                                  |                                                            |                     |                  |                 |                          |
|------------------------------------------------------------------|------------------------------------------------------------|---------------------|------------------|-----------------|--------------------------|
| <b>Target M/Z</b>                                                | <b>450.0468</b>                                            | <b>Result type:</b> | <b>Positive</b>  | <b>Species:</b> | <b>[M+H]<sup>+</sup></b> |
| <b>Elements:</b>                                                 | <b>C(0-40); H(0-80); O(0-10); N(0-10); Br(0-1); S(0-1)</b> |                     |                  |                 |                          |
| <b>Ion Formula</b>                                               | <b>Calculated M/Z</b>                                      |                     | <b>PPM error</b> |                 |                          |
| <b>C<sub>19</sub>H<sub>20</sub>BrN<sub>3</sub>O<sub>3</sub>S</b> | <b>450.0487</b>                                            |                     | <b>-4.22</b>     |                 |                          |

### HRMS (ESI) spectrum of compound 4b

Mazhengyue-b4 #11 RT: 0.11 AV: 1 NL: 1.44E9  
T: FTMS + p ESI Full ms [100.00-1500.00]

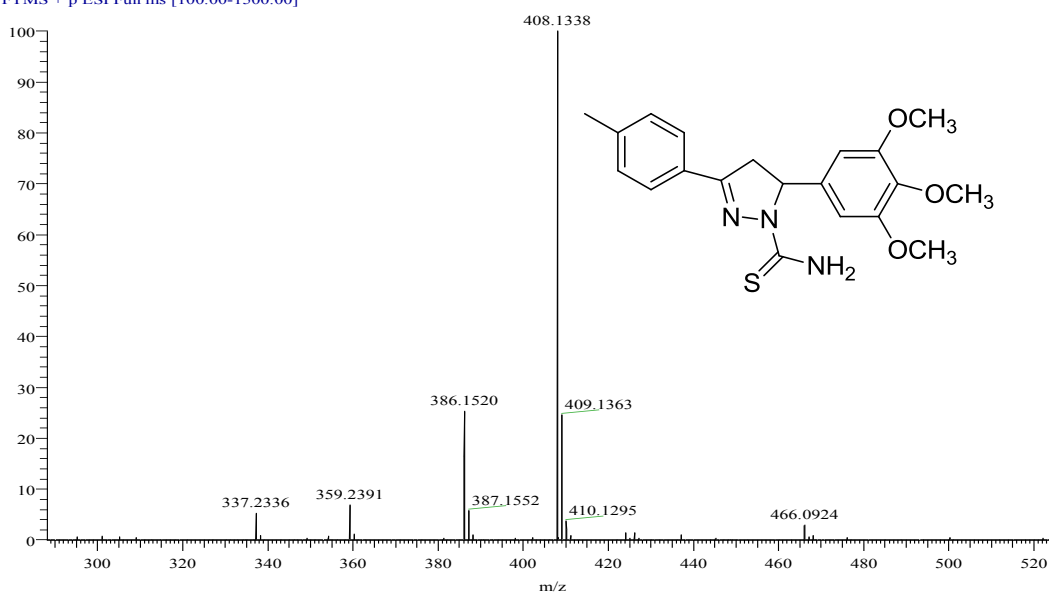

### Elemental Composition calculator

|                                                                |                                                   |                     |                  |                 |                           |
|----------------------------------------------------------------|---------------------------------------------------|---------------------|------------------|-----------------|---------------------------|
| <b>Target M/Z</b>                                              | <b>408.1338</b>                                   | <b>Result type:</b> | <b>Positive</b>  | <b>Species:</b> | <b>[M+Na]<sup>+</sup></b> |
| <b>Elements:</b>                                               | <b>C(0-40); H(0-80); O(0-10); N(0-10); S(0-1)</b> |                     |                  |                 |                           |
| <b>Ion Formula</b>                                             | <b>Calculated M/Z</b>                             |                     | <b>PPM error</b> |                 |                           |
| <b>C<sub>20</sub>H<sub>23</sub>N<sub>3</sub>O<sub>3</sub>S</b> | <b>408.1358</b>                                   |                     | <b>-4.9</b>      |                 |                           |

### HRMS (ESI) spectrum of compound 5b

Mazhengyue-b5 #11 RT: 0.11 AV: 1 NL: 1.05E8  
 T: FTMS + p ESI Full ms [100.00-1500.00]

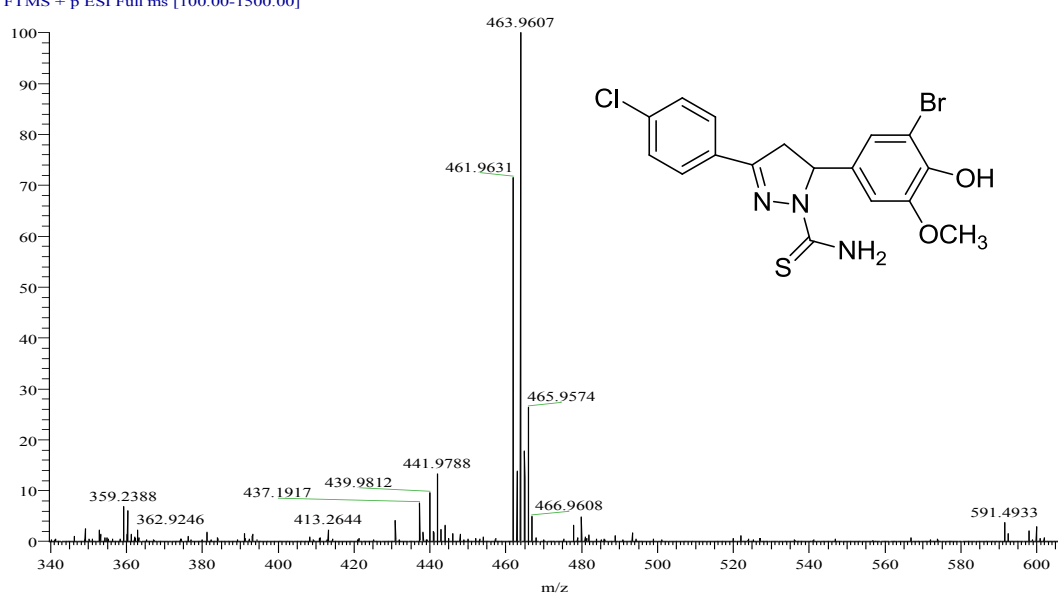

### Elemental Composition calculator

|                                                                    |                                                                     |                     |                 |                 |                           |
|--------------------------------------------------------------------|---------------------------------------------------------------------|---------------------|-----------------|-----------------|---------------------------|
| <b>Target M/Z</b>                                                  | <b>461.9631</b>                                                     | <b>Result type:</b> | <b>Positive</b> | <b>Species:</b> | <b>[M+Na]<sup>+</sup></b> |
| <b>Elements:</b>                                                   | <b>C(0-40); H(0-80); O(0-10); N(0-10); Br(0-1); Cl(0-1); S(0-1)</b> |                     |                 |                 |                           |
| <b>Ion Formula</b>                                                 | <b>Calculated M/Z</b>                                               | <b>PPM error</b>    |                 |                 |                           |
| <b>C<sub>17</sub>H<sub>15</sub>BrClN<sub>3</sub>O<sub>2</sub>S</b> | <b>461.9634</b>                                                     | <b>-0.6</b>         |                 |                 |                           |

### HRMS (ESI) spectrum of compound 6b

Mazhengyue-b6 #13 RT: 0.13 AV: 1 NL: 2.33E8  
 T: FTMS + p ESI Full ms [100.00-1500.00]

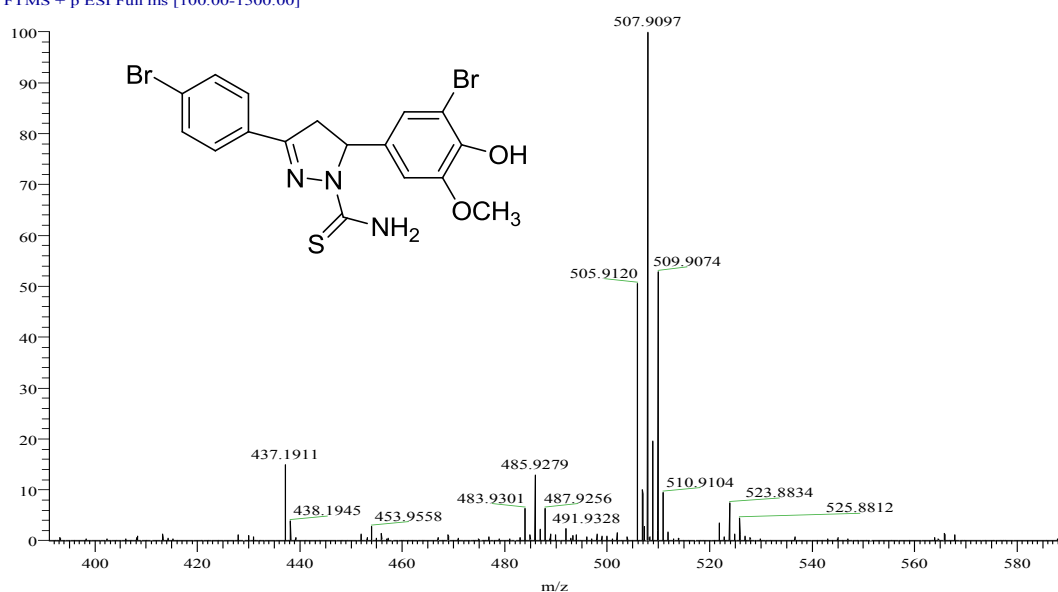

### Elemental Composition calculator

|                                                                              |                                                            |                     |                  |                 |                           |
|------------------------------------------------------------------------------|------------------------------------------------------------|---------------------|------------------|-----------------|---------------------------|
| <b>Target M/Z</b>                                                            | <b>507.9097</b>                                            | <b>Result type:</b> | <b>Positive</b>  | <b>Species:</b> | <b>[M+Na]<sup>+</sup></b> |
| <b>Elements:</b>                                                             | <b>C(0-40); H(0-80); O(0-10); N(0-10); Br(0-1); S(0-1)</b> |                     |                  |                 |                           |
| <b>Ion Formula</b>                                                           | <b>Calculated M/Z</b>                                      |                     | <b>PPM error</b> |                 |                           |
| <b>C<sub>17</sub>H<sub>15</sub>Br<sub>2</sub>N<sub>3</sub>O<sub>2</sub>S</b> | <b>507.9107</b>                                            |                     | <b>-1.96</b>     |                 |                           |

### HRMS (ESI) spectrum of compound 7b

Mazhengyue-b7 #11 RT: 0.11 AV: 1 NL: 5.37E8  
T: FTMS + p ESI Full ms [100.00-1500.00]

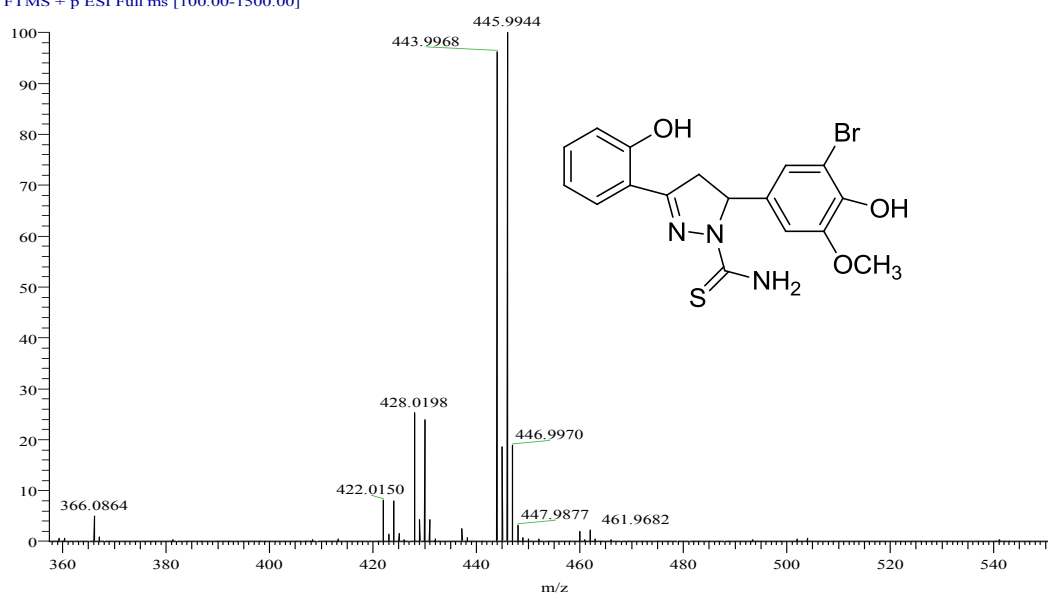

### Elemental Composition calculator

|                                                                  |                                                            |                     |                  |                 |                           |
|------------------------------------------------------------------|------------------------------------------------------------|---------------------|------------------|-----------------|---------------------------|
| <b>Target M/Z</b>                                                | <b>443.9968</b>                                            | <b>Result type:</b> | <b>Positive</b>  | <b>Species:</b> | <b>[M+Na]<sup>+</sup></b> |
| <b>Elements:</b>                                                 | <b>C(0-40); H(0-80); O(0-10); N(0-10); Br(0-1); S(0-1)</b> |                     |                  |                 |                           |
| <b>Ion Formula</b>                                               | <b>Calculated M/Z</b>                                      |                     | <b>PPM error</b> |                 |                           |
| <b>C<sub>17</sub>H<sub>16</sub>BrN<sub>3</sub>O<sub>3</sub>S</b> | <b>443.9973</b>                                            |                     | <b>-1.1</b>      |                 |                           |

### HRMS (ESI) spectrum of compound 8b

Mazhengyue-b8 #11 RT: 0.11 AV: 1 NL: 1.42E9  
 T: FTMS + p ESI Full ms [100.00-1500.00]

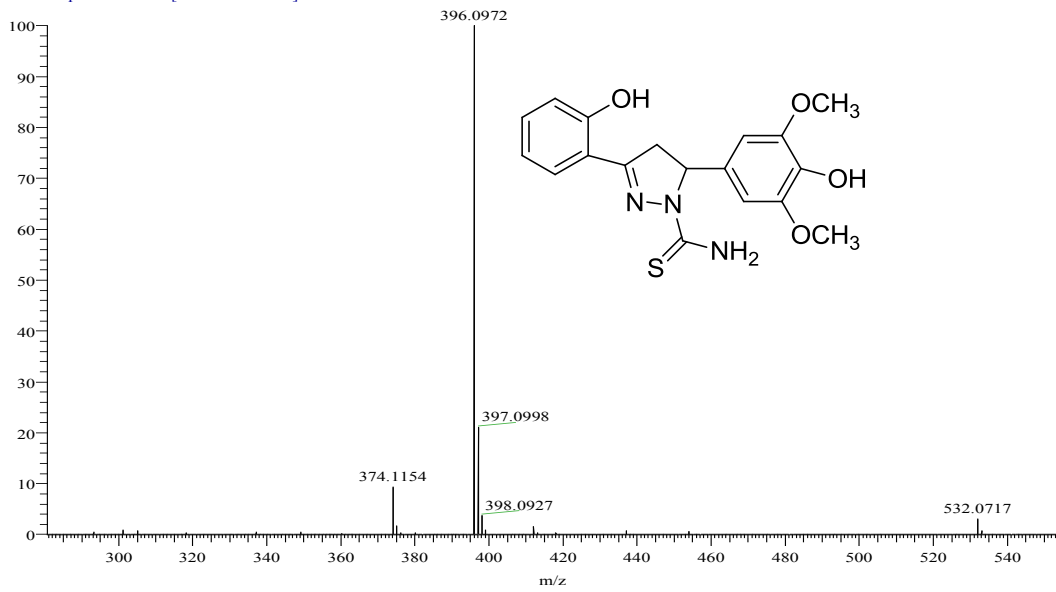

### Elemental Composition calculator

|                                                                |                                                   |                     |                 |                 |                           |
|----------------------------------------------------------------|---------------------------------------------------|---------------------|-----------------|-----------------|---------------------------|
| <b>Target M/Z</b>                                              | <b>396.0972</b>                                   | <b>Result type:</b> | <b>Positive</b> | <b>Species:</b> | <b>[M+Na]<sup>+</sup></b> |
| <b>Elements:</b>                                               | <b>C(0-40); H(0-80); O(0-10); N(0-10); S(0-1)</b> |                     |                 |                 |                           |
| <b>Ion Formula</b>                                             | <b>Calculated M/Z</b>                             | <b>PPM error</b>    |                 |                 |                           |
| <b>C<sub>18</sub>H<sub>19</sub>N<sub>3</sub>O<sub>4</sub>S</b> | <b>396.0984</b>                                   | <b>-3.0</b>         |                 |                 |                           |

### HRMS (ESI) spectrum of compound 9b

Mazhengyue-b9 #11 RT: 0.11 AV: 1 NL: 4.97E8  
 T: FTMS + p ESI Full ms [100.00-1500.00]

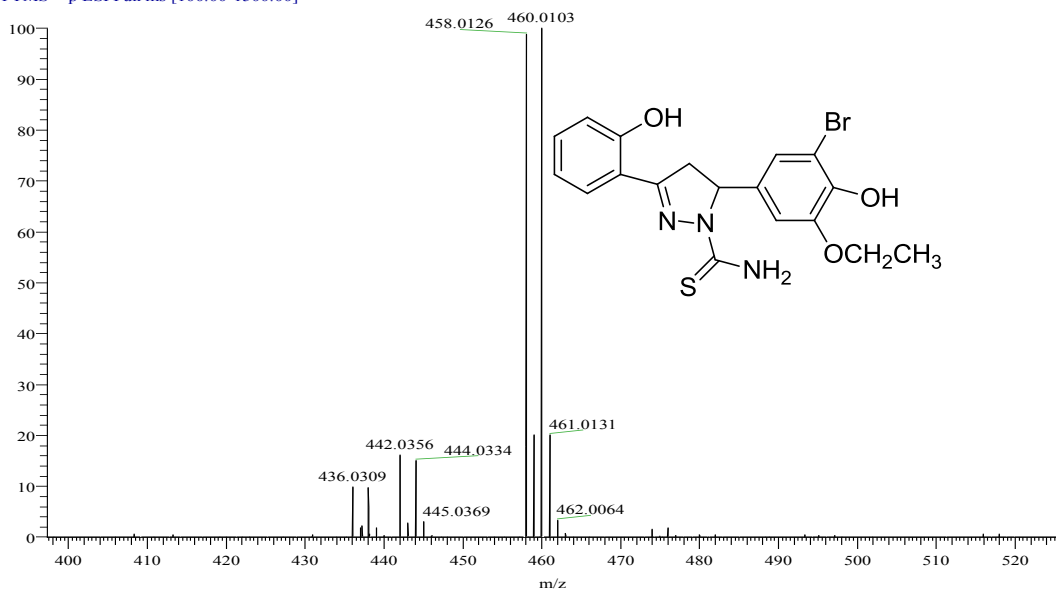

### Elemental Composition calculator

|                                                                  |                                                            |                     |                  |                 |                           |
|------------------------------------------------------------------|------------------------------------------------------------|---------------------|------------------|-----------------|---------------------------|
| <b>Target M/Z</b>                                                | <b>460.0108</b>                                            | <b>Result type:</b> | <b>Positive</b>  | <b>Species:</b> | <b>[M+Na]<sup>+</sup></b> |
| <b>Elements:</b>                                                 | <b>C(0-40); H(0-80); O(0-10); N(0-10); Br(0-1); S(0-1)</b> |                     |                  |                 |                           |
| <b>Ion Formula</b>                                               | <b>Calculated M/Z</b>                                      |                     | <b>PPM error</b> |                 |                           |
| <b>C<sub>18</sub>H<sub>18</sub>BrN<sub>3</sub>O<sub>3</sub>S</b> | <b>460.0129</b>                                            |                     | <b>-4.5</b>      |                 |                           |

### HRMS (ESI) spectrum of compound 10b

Mazhengyue-b10 #11 RT: 0.11 AV: 1 NL: 1.36E9  
T: FTMS + p ESI Full ms [100.00-1500.00]

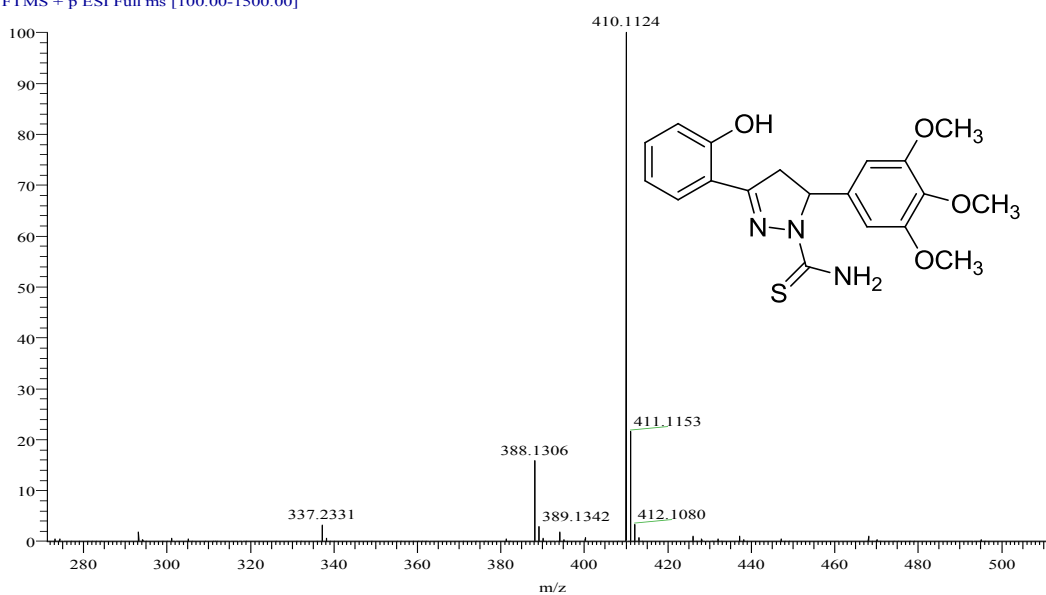

### Elemental Composition calculator

|                                                                |                                                   |                     |                  |                 |                           |
|----------------------------------------------------------------|---------------------------------------------------|---------------------|------------------|-----------------|---------------------------|
| <b>Target M/Z</b>                                              | <b>410.1124</b>                                   | <b>Result type:</b> | <b>Positive</b>  | <b>Species:</b> | <b>[M+Na]<sup>+</sup></b> |
| <b>Elements:</b>                                               | <b>C(0-40); H(0-80); O(0-10); N(0-10); S(0-1)</b> |                     |                  |                 |                           |
| <b>Ion Formula</b>                                             | <b>Calculated M/Z</b>                             |                     | <b>PPM error</b> |                 |                           |
| <b>C<sub>19</sub>H<sub>21</sub>N<sub>3</sub>O<sub>4</sub>S</b> | <b>410.1140</b>                                   |                     | <b>-3.9</b>      |                 |                           |

### HRMS (ESI) spectrum of compound 11b

Mazhengyue-b11 #13 RT: 0.13 AV: 1 NL: 1.64E9  
 T: FTMS + p ESI Full ms [100.00-1500.00]

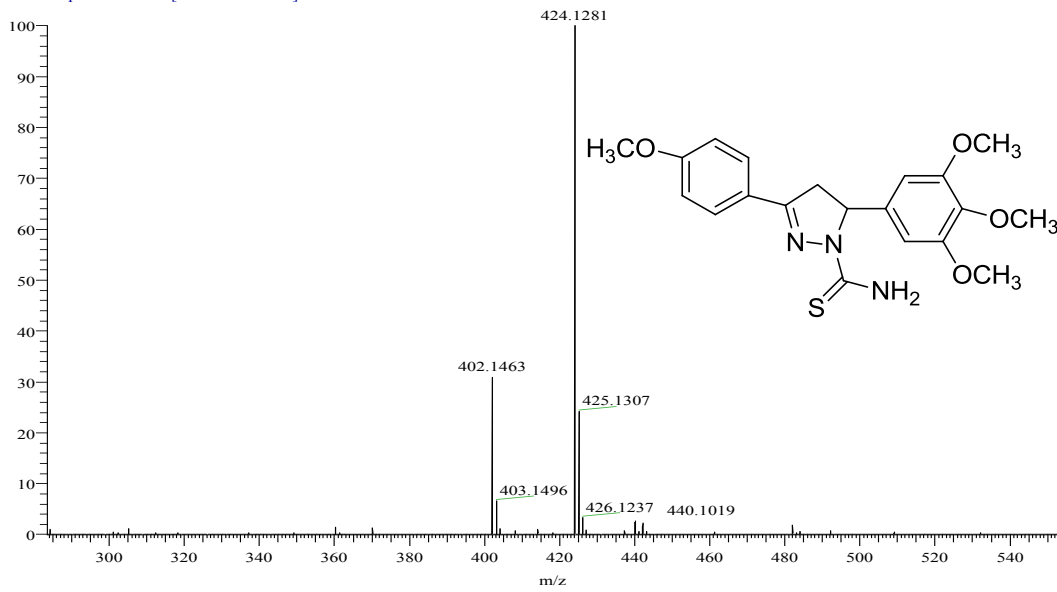

### Elemental Composition calculator

|                    |                                                                |                       |                 |                  |                           |
|--------------------|----------------------------------------------------------------|-----------------------|-----------------|------------------|---------------------------|
| <b>Target M/Z</b>  | <b>424.1281</b>                                                | <b>Result type:</b>   | <b>Positive</b> | <b>Species:</b>  | <b>[M+Na]<sup>+</sup></b> |
| <b>Elements:</b>   | <b>C(0-40); H(0-80); O(0-10); N(0-10); S(0-1)</b>              |                       |                 |                  |                           |
| <b>Ion Formula</b> | <b>C<sub>20</sub>H<sub>23</sub>N<sub>3</sub>O<sub>4</sub>S</b> | <b>Calculated M/Z</b> | <b>424.1301</b> | <b>PPM error</b> | <b>-4.7</b>               |

### HRMS (ESI) spectrum of compound 12b

Mazhengyue-b12 #11 RT: 0.11 AV: 1 NL: 4.58E8  
 T: FTMS + p ESI Full ms [100.00-1500.00]

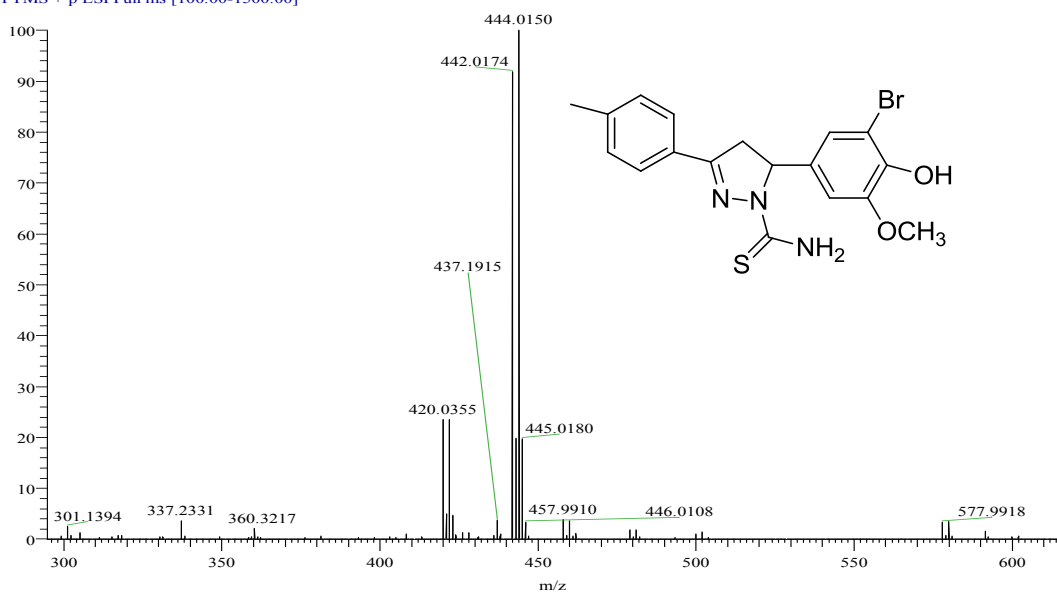

### Elemental Composition calculator



|                                                                   |                                                     |              |           |          |                     |
|-------------------------------------------------------------------|-----------------------------------------------------|--------------|-----------|----------|---------------------|
| Target M/Z                                                        | 444.0150                                            | Result type: | Positive  | Species: | [M+Na] <sup>+</sup> |
| Elements:                                                         | C(0-40); H(0-80); O(0-10); N(0-10); Br(0-1); S(0-1) |              |           |          |                     |
| Ion Formula                                                       | Calculated M/Z                                      |              | PPM error |          |                     |
| C <sub>18</sub> H <sub>18</sub> BrN <sub>3</sub> O <sub>2</sub> S | 444.0170                                            |              | -4.5      |          |                     |

Figure S4. The representative IR of compound 1b-12b.

1b

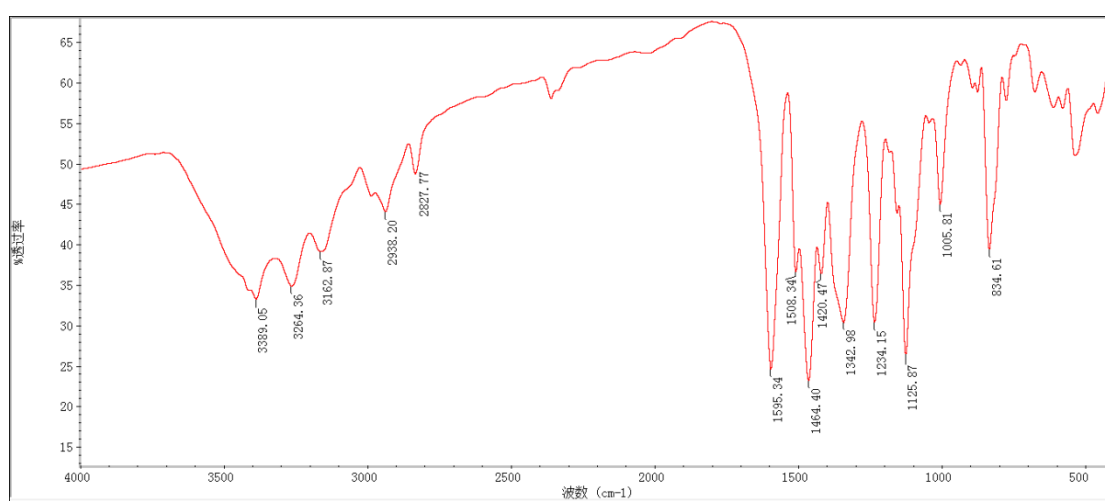

2b

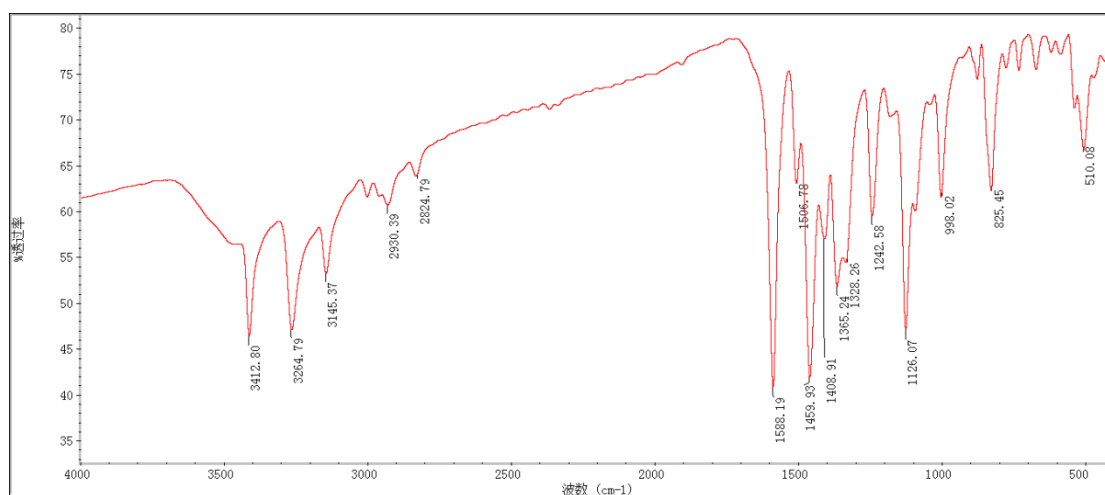

3b

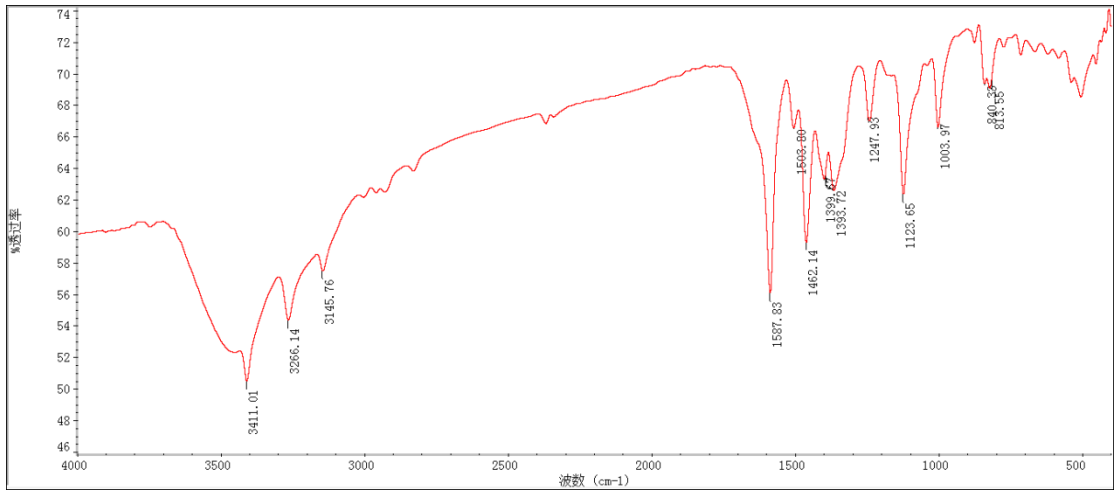

4b

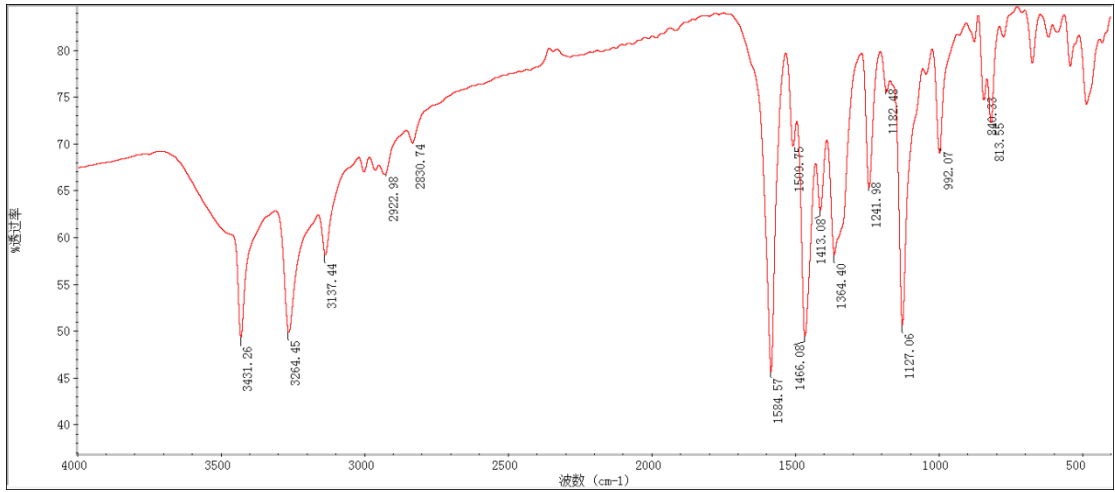

5b

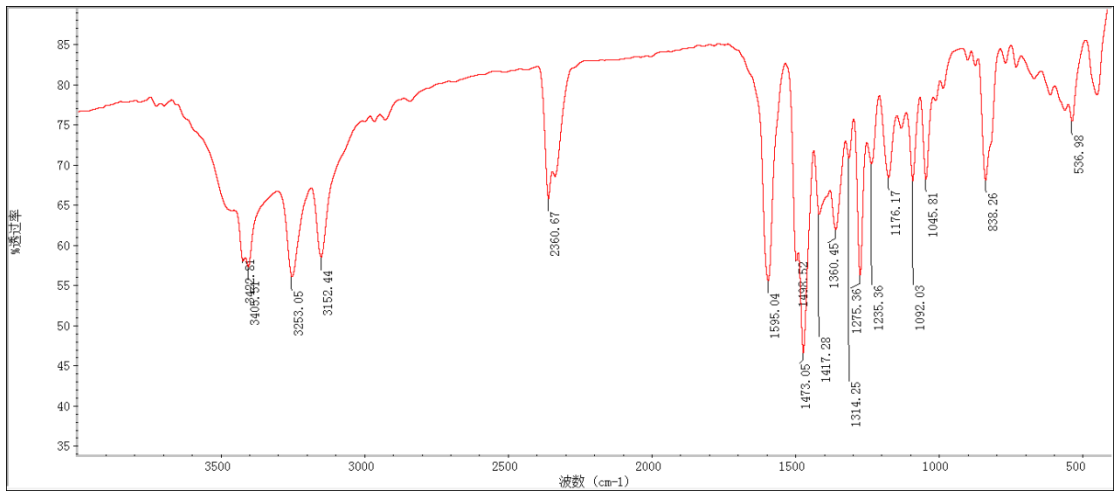

6b

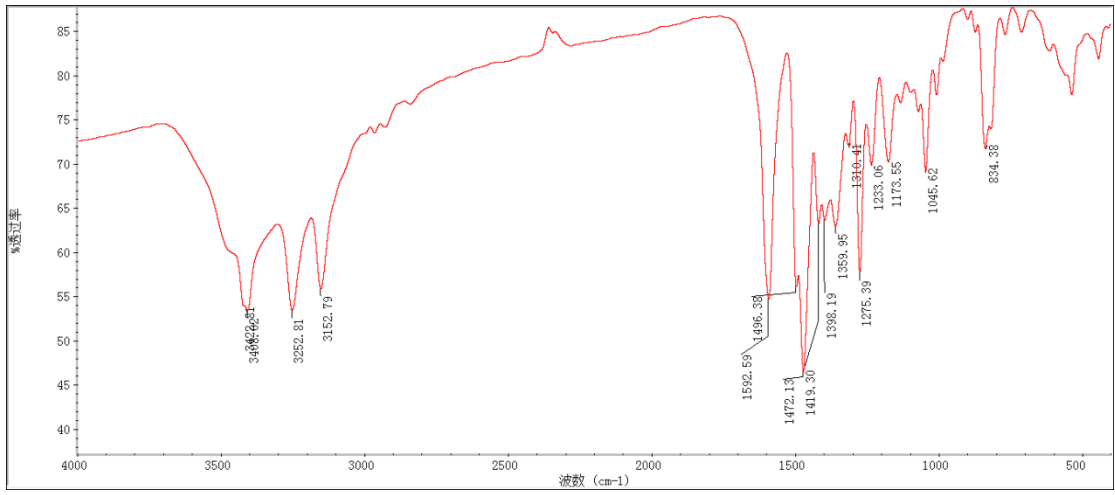

7b

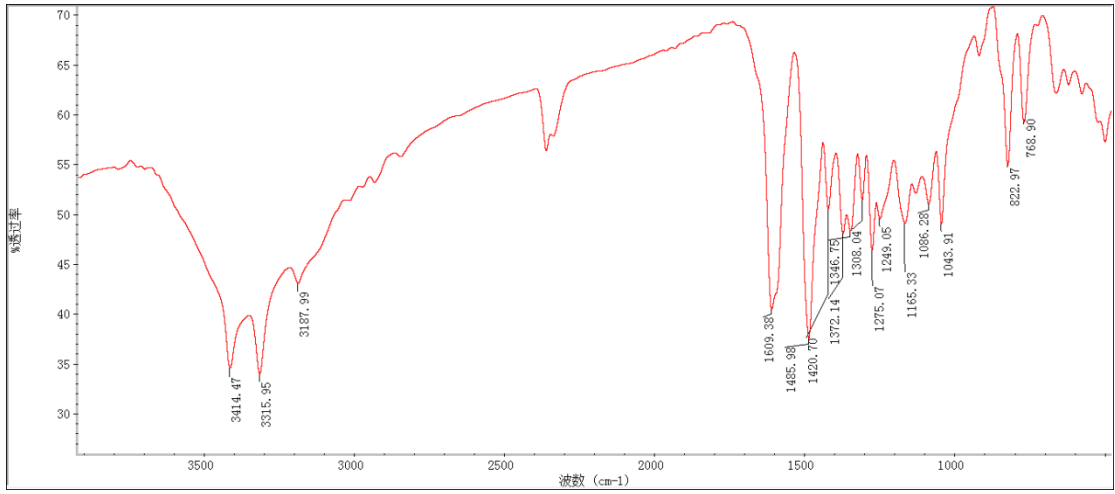

8b

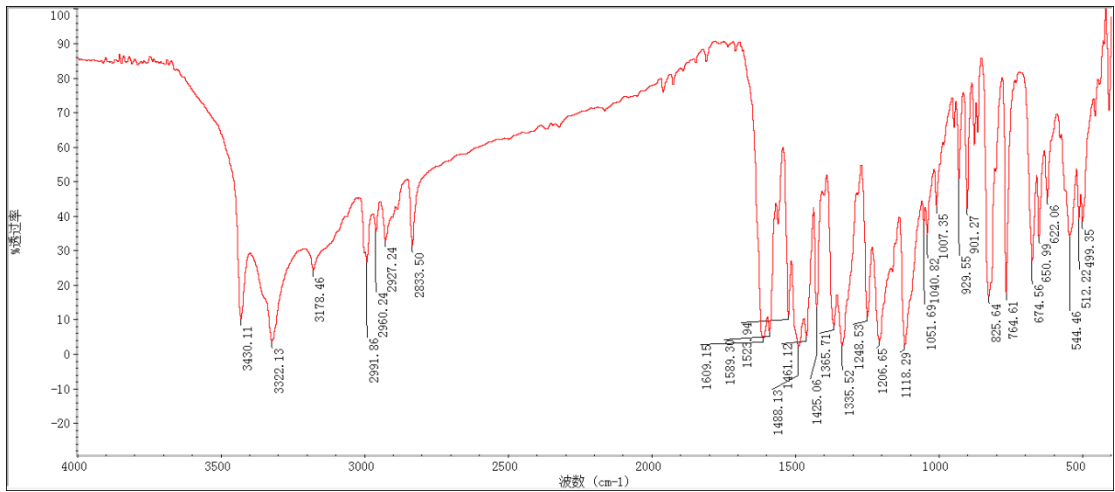

9b

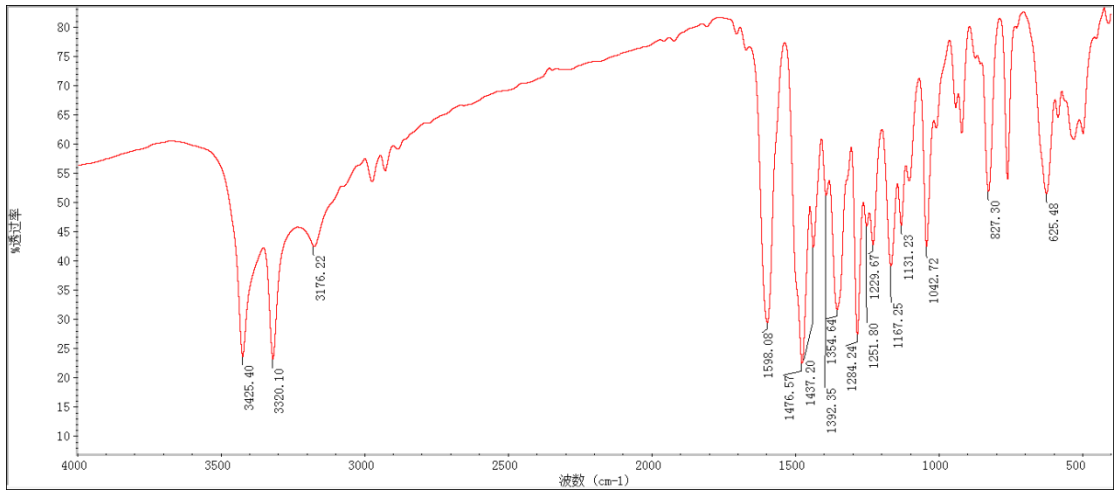

**10b**

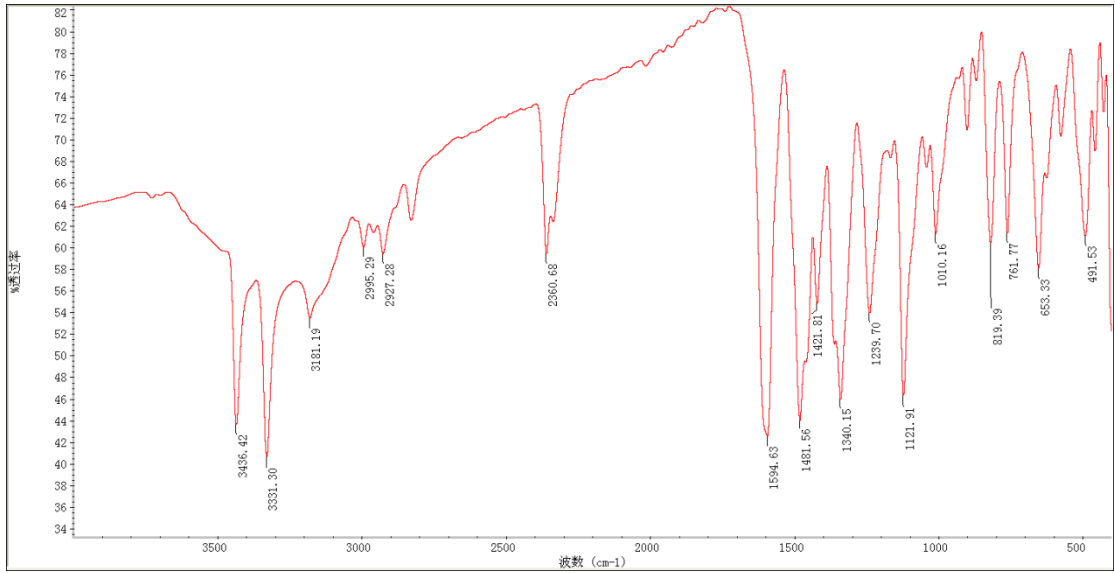

**11b**

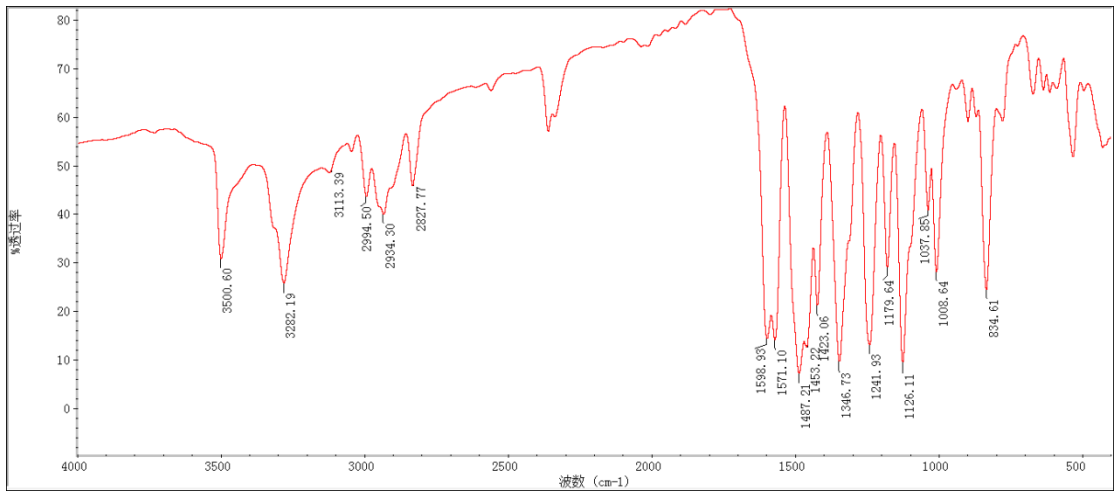

**12b**

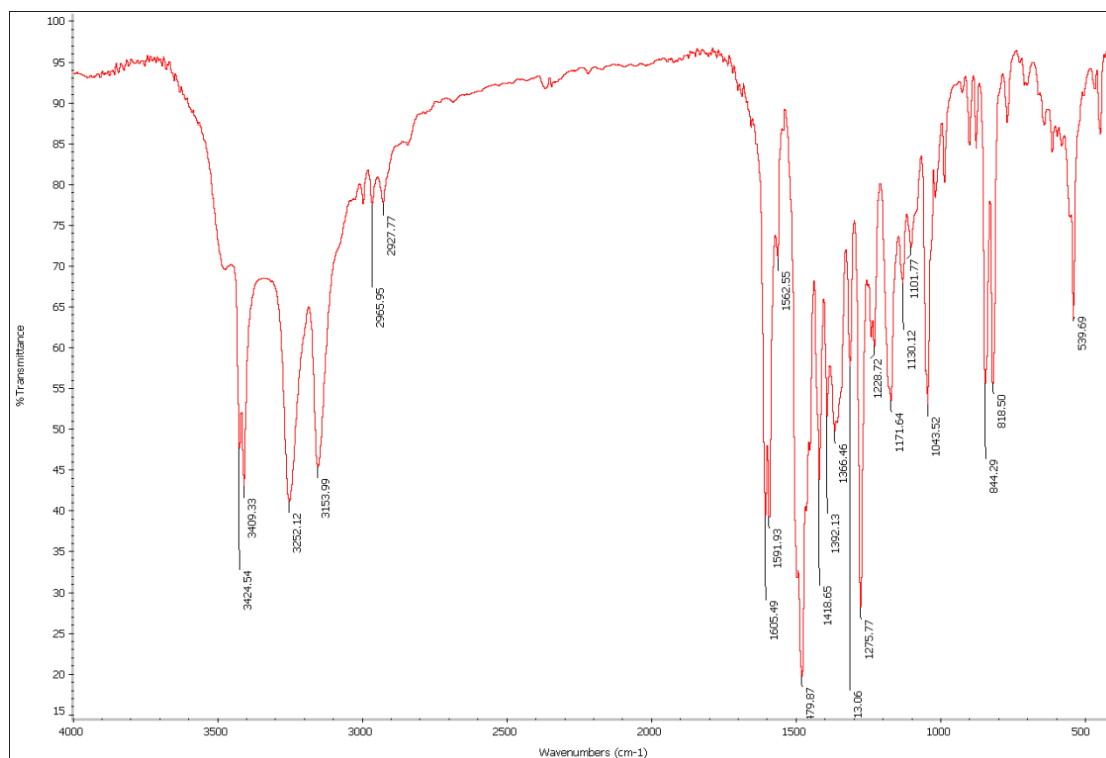

**Figure S5.** The representative HPLC chromatogram of compound **1b-12b**.

#### Purity determination of compound **1b**

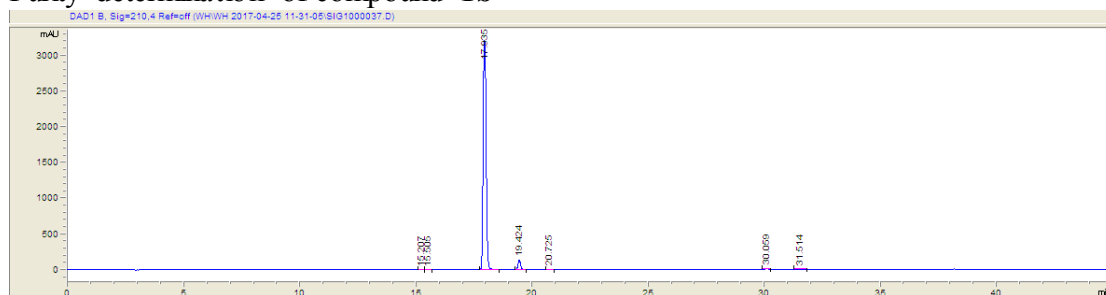

|   | RT     | Area    | Height | Peak width | Symmetry factor | %Area  |
|---|--------|---------|--------|------------|-----------------|--------|
| 1 | 15.207 | 19.4    | 2.7    | 0.1123     | 0.881           | 0.065  |
| 2 | 15.505 | 20.1    | 2.8    | 0.1119     | 0.884           | 0.067  |
| 3 | 17.935 | 28596.9 | 3203.1 | 0.1422     | 0.852           | 95.773 |
| 4 | 19.424 | 1057.7  | 136.3  | 0.1205     | 0.865           | 3.542  |
| 5 | 20.725 | 25.3    | 3.2    | 0.1201     | 0.85            | 0.085  |
| 6 | 30.059 | 113.4   | 13.5   | 0.13       | 0.928           | 0.380  |
| 7 | 31.514 | 26.3    | 1.9    | 0.2063     | 0.56            | 0.088  |

#### Purity determination of compound **2b**

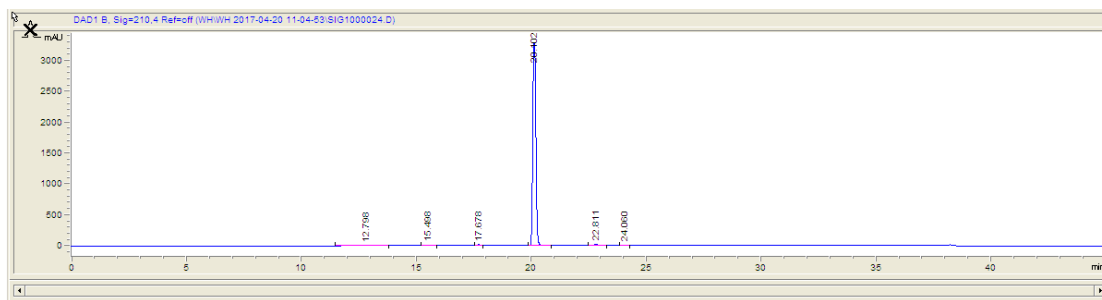

|   | RT     | Area    | Height | Peak width | Symmetry factor | %Area  |
|---|--------|---------|--------|------------|-----------------|--------|
| 1 | 12.798 | 574.2   | 7.3    | 1.0407     | 1.437           | 1.792  |
| 2 | 15.498 | 120.6   | 11.4   | 0.1514     | 0.816           | 0.376  |
| 3 | 17.678 | 147.3   | 16.3   | 0.1336     | 0.787           | 0.460  |
| 4 | 20.102 | 30824.5 | 3289.7 | 0.1493     | 0.875           | 96.218 |
| 5 | 22.811 | 261.7   | 24.4   | 0.1571     | 0.793           | 0.817  |
| 6 | 24.06  | 107.7   | 9.5    | 0.1636     | 0.957           | 0.336  |

#### Purity determination of compound **3b**

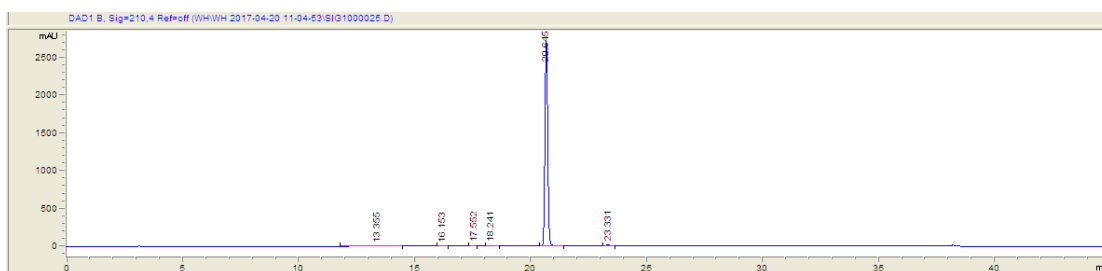

|   | RT     | Area    | Height | Peak width | Symmetry factor | %Area  |
|---|--------|---------|--------|------------|-----------------|--------|
| 1 | 13.355 | 377.9   | 4.8    | 1.0586     | 1.452           | 1.630  |
| 2 | 16.153 | 45.5    | 4.4    | 0.1515     | 0.745           | 0.196  |
| 3 | 17.552 | 54.3    | 6.2    | 0.1349     | 0.938           | 0.234  |
| 4 | 18.241 | 102     | 10.2   | 0.1441     | 0.64            | 0.44   |
| 5 | 20.645 | 22429.1 | 2707   | 0.1287     | 0.88            | 96.768 |
| 6 | 23.331 | 169.5   | 18.1   | 0.1412     | 0.889           | 0.731  |

#### Purity determination of compound **4b**

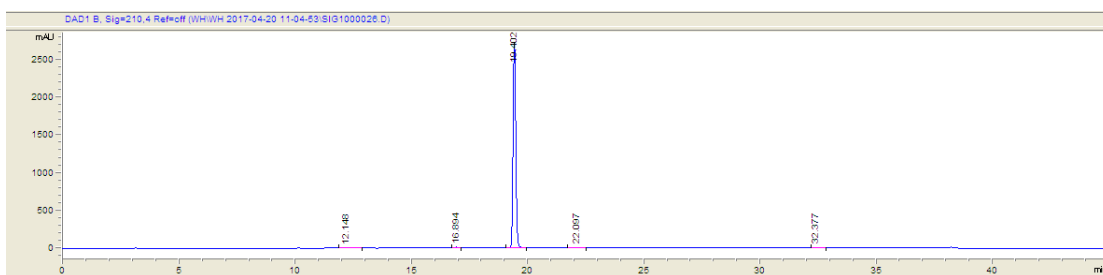

|   | RT     | Area    | Height | Peak width | Symmetry factor | %Area  |
|---|--------|---------|--------|------------|-----------------|--------|
| 1 | 12.148 | 141.6   | 3.5    | 0.5001     | 0.557           | 0.623  |
| 2 | 16.894 | 109.5   | 12.9   | 0.1267     | 0.82            | 0.482  |
| 3 | 19.402 | 22280.8 | 2721.3 | 0.1315     | 0.866           | 98.038 |
| 4 | 22.097 | 111.6   | 9.6    | 0.164      | 0.813           | 0.419  |
| 5 | 32.377 | 83.2    | 6.6    | 0.1824     | 0.61            | 0.366  |

### Purity determination of compound **5b**

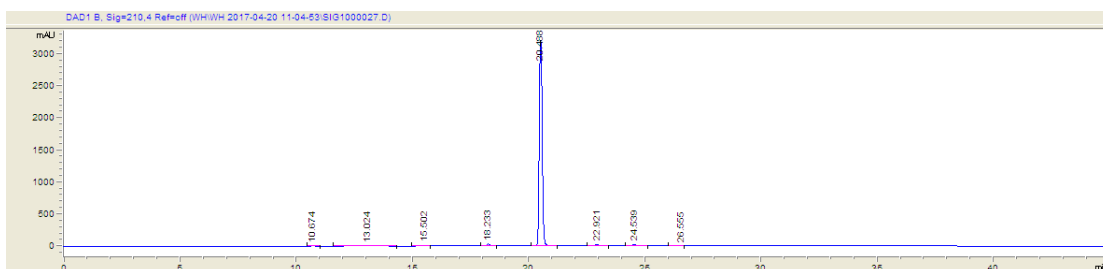

|   | RT     | Area    | Height | Peak width | Symmetry factor | %Area  |
|---|--------|---------|--------|------------|-----------------|--------|
| 1 | 10.674 | 47.9    | 5.3    | 0.1367     | 0.803           | 0.161  |
| 2 | 13.024 | 390     | 5.2    | 0.9833     | 1.326           | 1.313  |
| 3 | 15.502 | 136.5   | 15     | 0.1383     | 1.125           | 0.459  |
| 4 | 18.233 | 260.3   | 31.6   | 0.1281     | 0.785           | 0.876  |
| 5 | 20.488 | 28318.7 | 3207.4 | 0.143      | 0.857           | 95.319 |
| 6 | 22.921 | 280.2   | 27.4   | 0.1512     | 0.893           | 0.943  |
| 7 | 24.539 | 252     | 23.1   | 0.1592     | 0.632           | 0.848  |
| 8 | 26.555 | 23.7    | 8.1E-1 | 0.3747     | 3.118           | 0.080  |

### Purity determination of compound **6b**

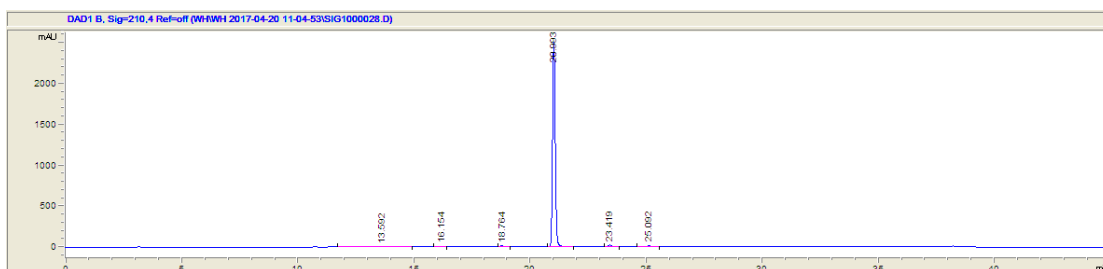

|   | RT     | Area    | Height | Peak width | Symmetry factor | %Area  |
|---|--------|---------|--------|------------|-----------------|--------|
| 1 | 13.592 | 295.8   | 3.9    | 0.9823     | 1.314           | 1.418  |
| 2 | 16.154 | 47.8    | 5.5    | 0.1337     | 1.022           | 0.229  |
| 3 | 18.764 | 120.7   | 14.1   | 0.128      | 0.708           | 0.579  |
| 4 | 20.993 | 20007.5 | 2498.1 | 0.1254     | 0.857           | 95.940 |
| 5 | 23.419 | 208.1   | 21.9   | 0.1431     | 0.789           | 0.998  |
| 6 | 25.092 | 174.4   | 14.1   | 0.1735     | 0.705           | 0.836  |

### Purity determination of compound **7b**

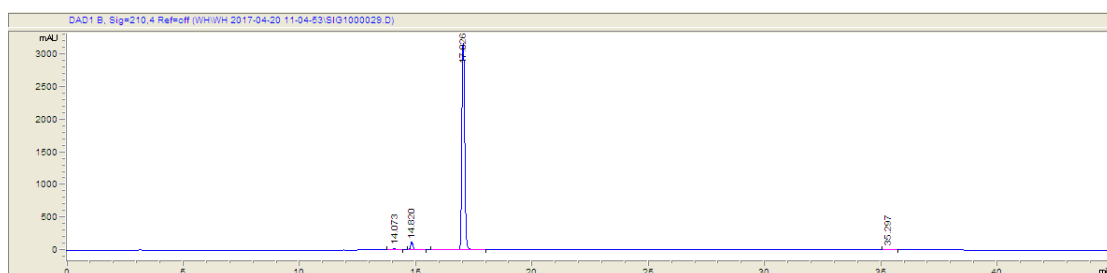

|   | RT     | Area    | Height | Peak width | Symmetry factor | %Area  |
|---|--------|---------|--------|------------|-----------------|--------|
| 1 | 14.073 | 184.7   | 23.8   | 0.1187     | 0.829           | 0.648  |
| 2 | 14.82  | 881.8   | 117.2  | 0.1158     | 0.822           | 3.095  |
| 3 | 17.026 | 27329.1 | 3157.9 | 0.1369     | 0.823           | 95.891 |
| 4 | 35.297 | 104.2   | 7.9    | 0.2067     | 0.937           | 0.366  |

### Purity determination of compound **8b**

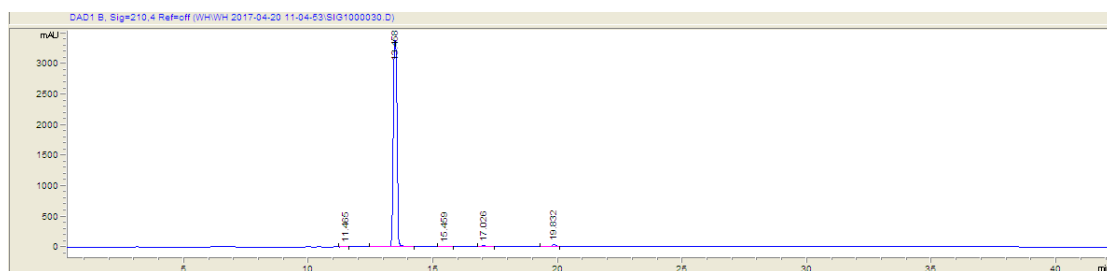

|   | RT     | Area    | Height | Peak width | Symmetry factor | %Area  |
|---|--------|---------|--------|------------|-----------------|--------|
| 1 | 11.465 | 114.1   | 14.2   | 0.1219     | 0.989           | 0.343  |
| 2 | 13.458 | 32450.4 | 3379.2 | 0.152      | 0.861           | 97.543 |
| 3 | 15.459 | 113.2   | 9      | 0.178      | 0.771           | 0.340  |
| 4 | 17.026 | 214.5   | 24.6   | 0.1296     | 0.781           | 0.645  |
| 5 | 19.832 | 375.7   | 43.6   | 0.1326     | 0.753           | 1.129  |

### Purity determination of compound **9b**



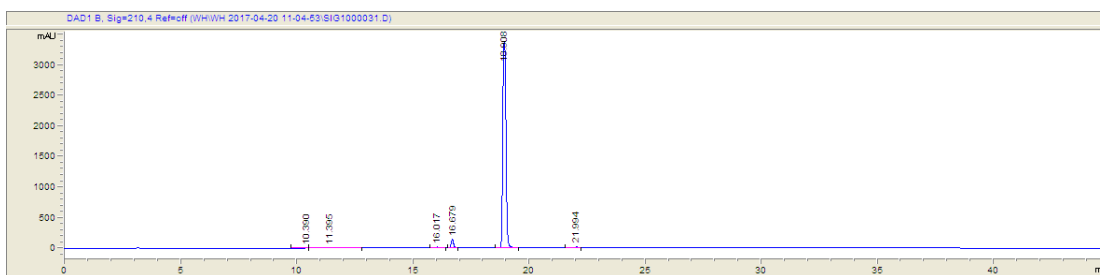

|   | RT     | Area    | Height | Peak width | Symmetry factor | %Area  |
|---|--------|---------|--------|------------|-----------------|--------|
| 1 | 10.39  | 26.8    | 2.9    | 0.1369     | 1.203           | 0.079  |
| 2 | 11.395 | 270.7   | 4.1    | 0.8545     | 1.013           | 0.795  |
| 3 | 16.017 | 134.3   | 15.5   | 0.1329     | 0.806           | 0.394  |
| 4 | 16.679 | 1037.6  | 137.1  | 0.1163     | 0.832           | 3.046  |
| 5 | 18.908 | 32395.2 | 3384.5 | 0.1517     | 0.836           | 95.103 |
| 6 | 21.994 | 198.8   | 21.5   | 0.14       | 1.017           | 0.584  |

### Purity determination of compound 10b

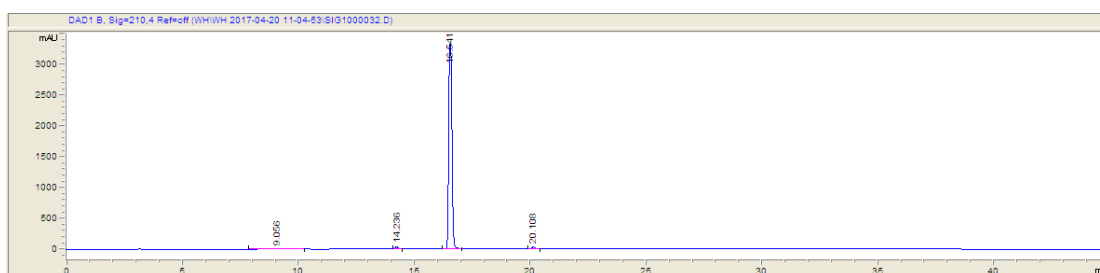

|   | RT     | Area    | Height | Peak width | Symmetry factor | %Area  |
|---|--------|---------|--------|------------|-----------------|--------|
| 1 | 9.056  | 407.1   | 6.6    | 0.8444     | 1.235           | 1.219  |
| 2 | 14.236 | 342.8   | 45.7   | 0.1155     | 0.841           | 1.027  |
| 3 | 16.541 | 32389.3 | 3344.9 | 0.157      | 0.817           | 96.980 |
| 4 | 20.108 | 258.6   | 29.9   | 0.1288     | 0.795           | 0.774  |

### Purity determination of compound 11b

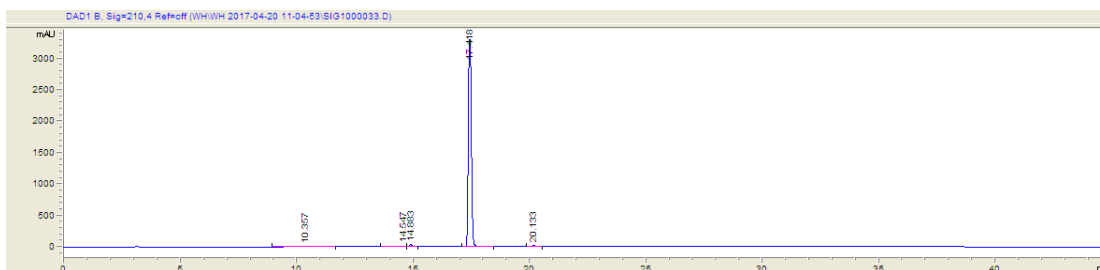

|  | RT     | Area | Height | Peak width | Symmetry factor | %Area |
|--|--------|------|--------|------------|-----------------|-------|
|  | 10.357 |      |        |            |                 |       |
|  | 14.57  |      |        |            |                 |       |
|  | 14.865 |      |        |            |                 |       |
|  | 18     |      |        |            |                 |       |
|  | 20.133 |      |        |            |                 |       |

|   |        |         |      |        |       |        |
|---|--------|---------|------|--------|-------|--------|
| 1 | 10.357 | 408.7   | 6.3  | 0.8807 | 1.373 | 1.326  |
| 2 | 14.547 | 105.4   | 6.6  | 0.2139 | 1.438 | 0.342  |
| 3 | 14.883 | 266.6   | 32.8 | 0.1227 | 0.743 | 0.865  |
| 4 | 17.418 | 29855.2 | 3301 | 0.1455 | 0.849 | 96.835 |
| 5 | 20.133 | 194.9   | 19.6 | 0.1443 | 1.004 | 0.632  |

### Purity determination of compound **12b**

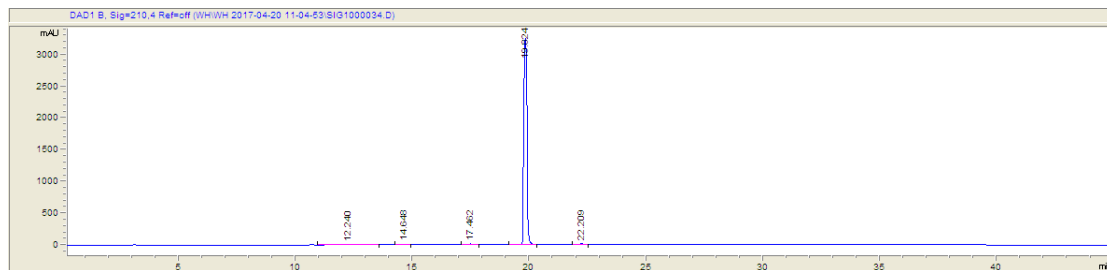

|   | RT     | Area    | Height | Peak width | Symmetry factor | %Area  |
|---|--------|---------|--------|------------|-----------------|--------|
| 1 | 12.24  | 385.1   | 4.8    | 1.0289     | 1.041           | 1.279  |
| 2 | 14.648 | 113.8   | 8.5    | 0.1886     | 1.032           | 0.378  |
| 3 | 17.462 | 225.8   | 19.1   | 0.1698     | 0.831           | 0.750  |
| 4 | 19.824 | 29074.3 | 3248.3 | 0.1444     | 0.855           | 96.604 |
| 5 | 22.209 | 297.4   | 20.1   | 0.2043     | 0.789           | 0.988  |
